# Supplementary material for: Asymmetric Solvation of the Zinc Dimer Cation Revealed by Infrared Multiple Photon Dissociation Spectroscopy of Zn2+(H2O)n (n = 1–20)
Source: MDPI journal article supplement (doi:10.3390/ijms22116026), 2021-06-02
Supplement: s1 [file s1]

# Supplementary Material

## Asymmetric solvation of the zinc dimer cation revealed by infrared multiple photon dissociation spectroscopy of $\text{Zn}_2^+(\text{H}_2\text{O})_n$ ( $n = 1-20$ )

Ethan M. Cunningham <sup>\*,†</sup>, Thomas Taxer <sup>†</sup>, Jakob Heller, Milan Ončák, Christian van der Linde and  
Martin K. Beyer <sup>\*</sup>

Institut für Ionenphysik und Angewandte Physik, Universität Innsbruck, Technikerstraße 25, 6020 Innsbruck, Austria

<sup>\*</sup>Correspondence: ethan.cunningham@uibk.ac.at (E.M.C.); martin.beyer@uibk.ac.at (M.K.B.)

<sup>†</sup>These authors contributed equally to this work.

### Table of Contents

|                                                                                                            |    |
|------------------------------------------------------------------------------------------------------------|----|
| Calculated Binding Energies.....                                                                           | 2  |
| Calculated Charges, Spin Densities, and Bond Distances of Zn–Zn.....                                       | 4  |
| Calculating IRMPD Cross Sections .....                                                                     | 6  |
| Outer Water Binding Motifs .....                                                                           | 7  |
| Calculated Structures.....                                                                                 | 9  |
| i) Coordination to one Zn atom in $\text{Zn}_2^+(\text{H}_2\text{O})_n$ clusters.....                      | 9  |
| ii) Coordination to both Zn atoms in $\text{Zn}_2^+(\text{H}_2\text{O})_n$ clusters .....                  | 11 |
| Infrared Multiple Photon Dissociation Spectra of $\text{Zn}_2^+(\text{H}_2\text{O})_n$ ( $n = 1-20$ )..... | 38 |
| References.....                                                                                            | 80 |

## Calculated Binding Energies

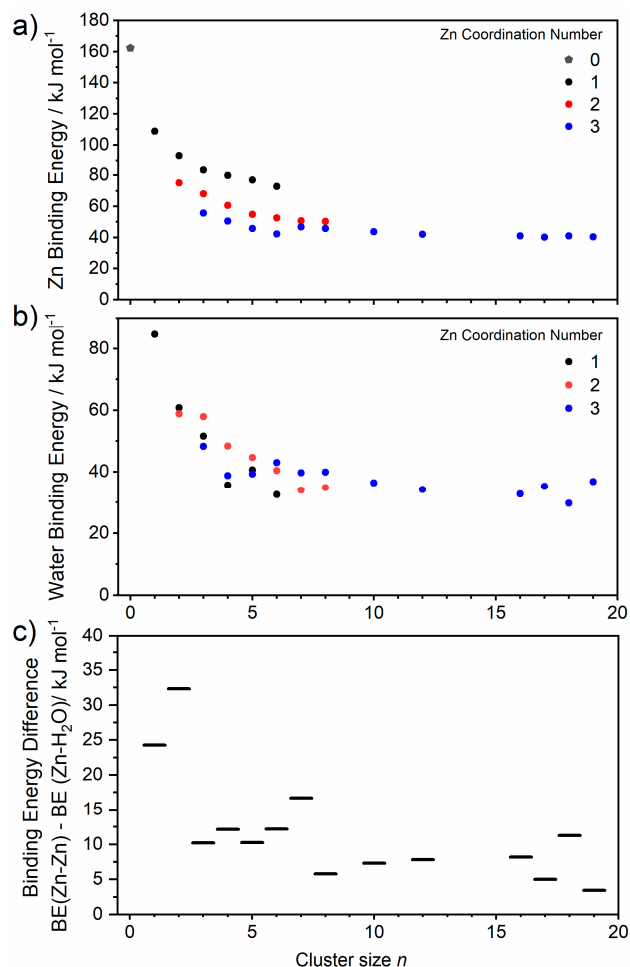

**Figure S1.** Calculated binding energies of a) one Zn atom, and b) one water molecule in  $Zn_2^+(H_2O)_n$  clusters ( $n = 1-19$ ) calculated at the B3LYP/aug-cc-pVDZ level of theory. These isomers correspond to water bound to one Zn atom. Using the water molecule as an example, binding energies are calculated:  $E[Zn_2^+(H_2O)_n] - E[Zn_2^+(H_2O)_{n-1}] - E[(H_2O)]$  including zero-point correction. For larger clusters, in particular  $n = 10, 12, 16$ , the binding energies were calculated using multiple water molecules,  $(H_2O)_m$ , where  $m = 2, 2$ , and  $4$  for  $n = 10, 12$ , and  $16$ , respectively. Calculated binding energy differences between lowest energy isomers in panels a) and b) are shown in c).

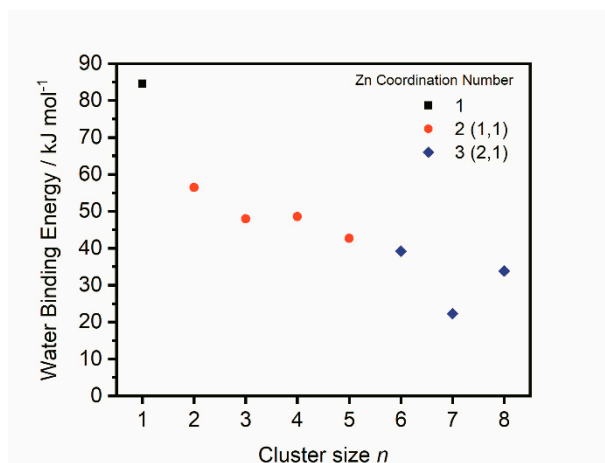

**Figure S2.** Calculated binding energies of one water molecule in  $\text{Zn}_2^+(\text{H}_2\text{O})_n$  clusters ( $n = 1-8$ ) calculated at the B3LYP/aug-cc-pVDZ level of theory. These isomers correspond to the lowest energy structure with water molecules bound to both Zn atoms. Binding energies are calculated:  $E[\text{Zn}_2^+(\text{H}_2\text{O})_n] - E[\text{Zn}_2^+(\text{H}_2\text{O})_{n-1}] - E[\text{H}_2\text{O}]$  including zero-point correction. For a particular structure, the minimum value binding energy is given, where  $\text{Zn}_2^+(\text{H}_2\text{O})_n$  and  $\text{Zn}_2^+(\text{H}_2\text{O})_{n-1}$  have the same substructure, with one water missing. In some cases, the minimum value corresponds to the  $\text{Zn}_2^+(\text{H}_2\text{O})_{n-1}$  structure with water molecules bound to one Zn atom. Numbers in brackets represent the number of water molecules to each Zn atom: taking 3(2,1) as an example, 2 waters are bound to one Zn, with 1 water bound to the other Zn atom.

## Calculated Charges, Spin Densities, and Bond Distances of Zn–Zn

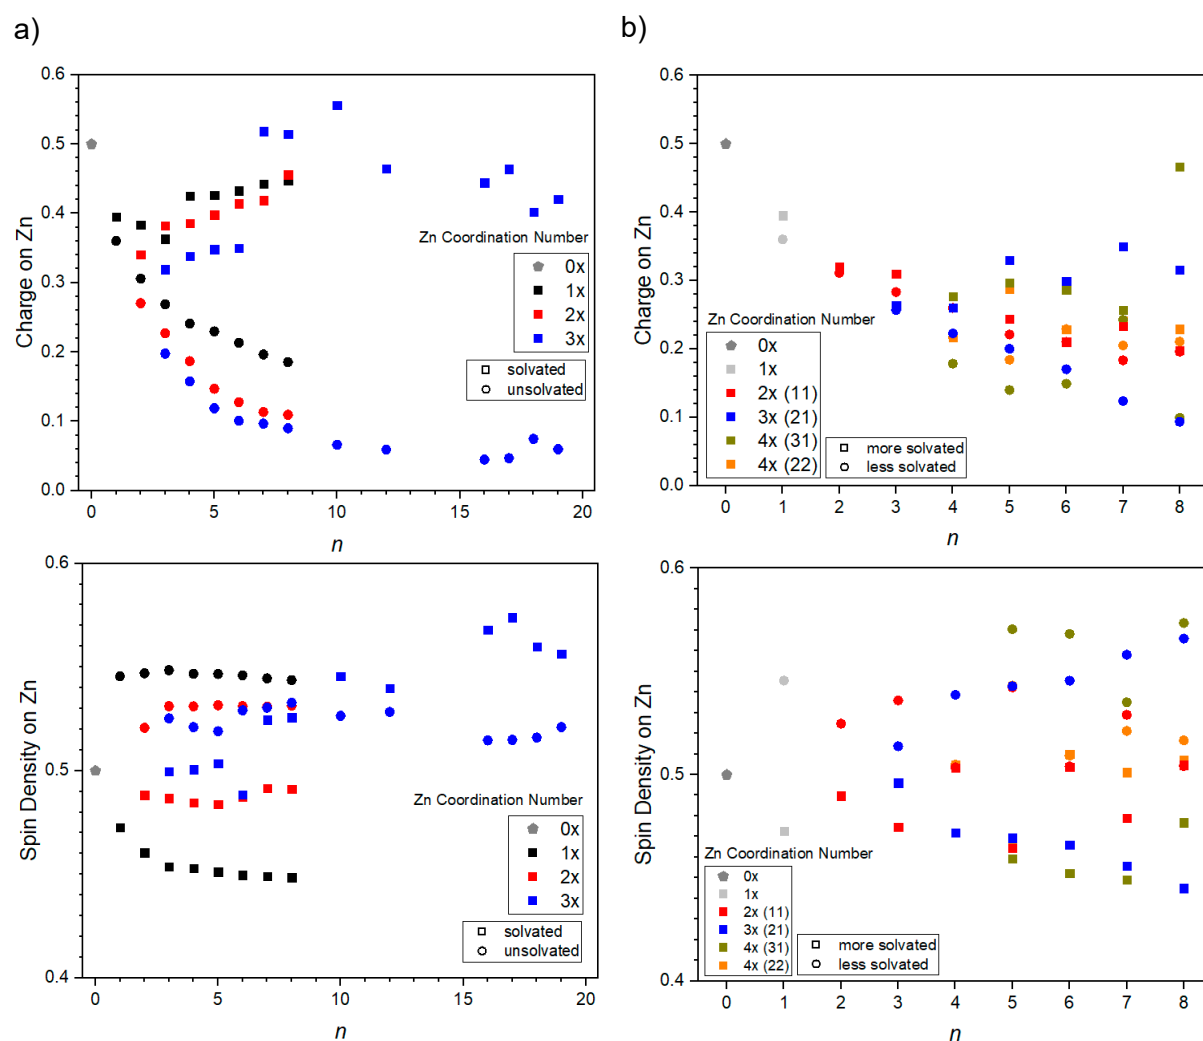

**Figure S3.** Calculated CHELPG charges and spin densities of  $\text{Zn}_2^+(\text{H}_2\text{O})_n$  clusters for a) water bound to one Zn atom ( $n = 1\text{--}19$ ), and b) water bound to both Zn atoms ( $n = 1\text{--}8$ ) calculated at the B3LYP/aug-cc-pVDZ level of theory. A radius 1.39 Å of was chosen for the Zn atom.

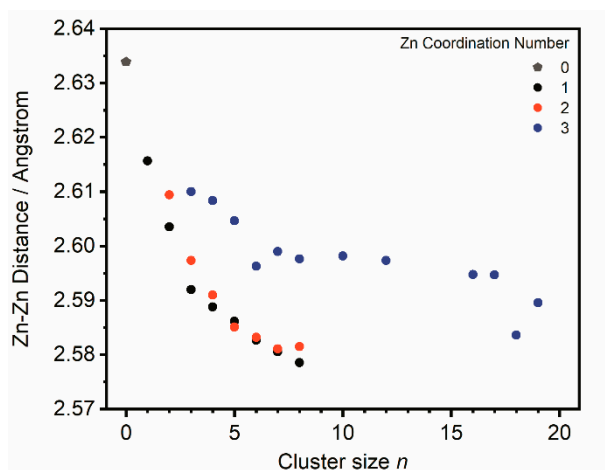

**Figure S4.** Zn–Zn bond distances obtained from calculated singly-coordinated isomers of  $\text{Zn}_n^{2+}(\text{H}_2\text{O})_n$  clusters ( $n = 1\text{--}19$ ) calculated at the B3LYP/aug-cc-pVDZ level of theory. The singly-coordinated Zn coordination numbers of 1, 2, and 3 are shown in black, red, and blue, respectively.

## Calculating IRMPD Cross Sections

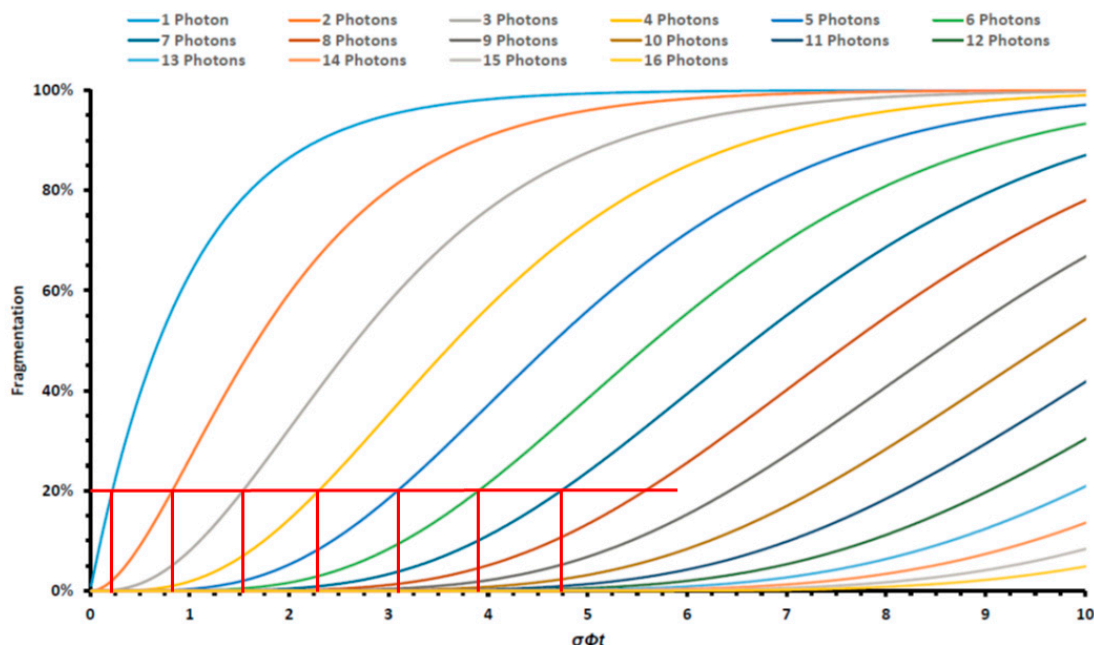

**Figure S5.** Quantitative analysis of multiphoton absorption, each curve representing  $k$  photons ( $k = 1$ –16) with the fragmentation yield (%) and  $\sigma\Phi t$ . Reproduced with permission from J. Heller, M. Ončák, N. K. Bersenkowitsch, C. van der Linde and M. K. Beyer, *Eur. J. Mass Spectrom.*, 2019, **25**, 122-132.

As outlined in previous publications, [1–3] infrared multi-photon photodissociation cross sections are calculated assuming consecutive first-order reactions, the kinetics of photon absorption are shown in Figure SX. Using Figure SX, along with the fragmentation yield after absorption of the  $k^{\text{th}}$  photon, the value of  $\sigma\Phi t$  can be readily obtained. By way of example, the values of  $\sigma\Phi t$  are shown for 1–7 photons, assuming a 20% fragmentation yield. The photon flux,  $\Phi$ , is measured using a power meter,  $t$  is controlled using the LabView software, thus the cross section,  $\sigma$ , can be calculated from  $\sigma\Phi t$ .

The number of photons required to dissociate a water molecule ranges from one to two, details of which is found in previous publications [1–3]. For all cluster sizes, photodissociation leading to loss of water molecules was found to be the only photofragment channel. To account for laser energy and irradiation time, single-photon cross sections,  $\sigma$ , are calculated using a modified Beer-Lambert equation, details are outlined in the experimental section of the main article.

## Outer Water Binding Motifs

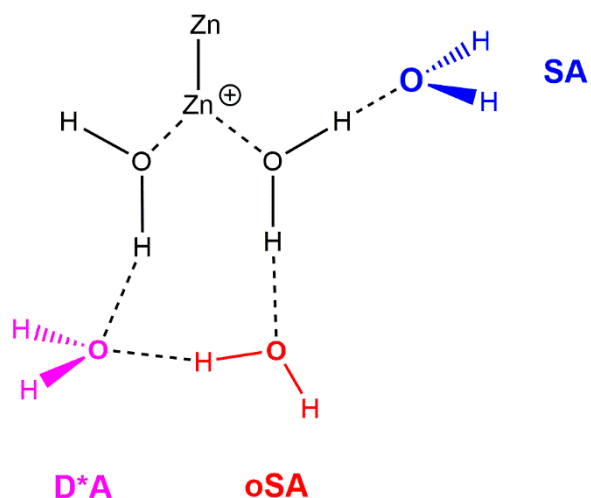

**Scheme S1.** Schematic representation of the  $\text{Zn}_2^+(\text{H}_2\text{O})_5$  cluster displaying three water configurations; a single-acceptor motif (SA), along with an outer single-acceptor motif (oSA) and an outer water bound to the oSA motif (D\*A). “Core” water molecules represent those directly bound to the Zn centre.

It should be noted that, in the case of SA, assignments are made to the core O–H in single acceptor (SA) motifs. This is different when assigning bands to the oSA motif, whereby it is the O–H vibration of the second sphere water (red H<sub>2</sub>O molecule). oSA and D\*A both represent “outer” single- and double-acceptor water molecules in the second hydration sphere (*i.e.* not directly bound to the Zn<sup>+</sup> centre). The O–H bonds in D\*A are isolated, whereas oSA has one isolated O–H with the other O–H bond hydrogen-bonded to D\*A. The D\*A water is bound *via* two hydrogen bonds, one from the core water, and another from oSA, thus is denoted a double-acceptor.

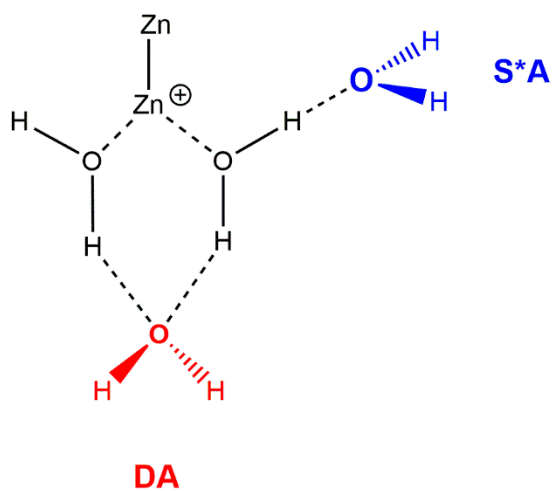

**Scheme S2.** Schematic representation of the  $\text{Zn}^{2+}(\text{H}_2\text{O})_4$  cluster displaying two water configurations; a single-acceptor motif (S\*A), along with the double-acceptor motif (DA).

S\*A is a different type of single-acceptor configuration, whereby the core water is bound to a single outer water, but also involved in a double-acceptor configuration.

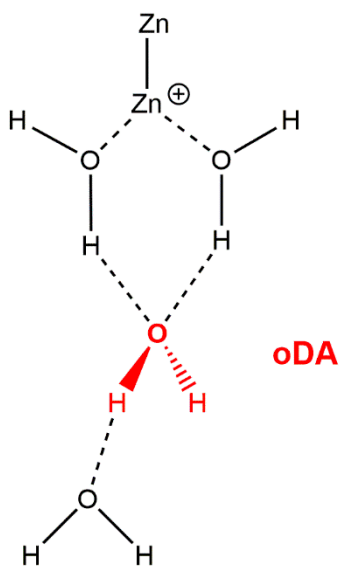

**Scheme S3.** Schematic representation of the  $\text{Zn}^{2+}(\text{H}_2\text{O})_4$  cluster showing the double-acceptor water molecule bound to another outer water molecule (oDA).



## Calculated Structures

### i) Coordination to one Zn atom in $\text{Zn}_2^+(\text{H}_2\text{O})_n$ clusters

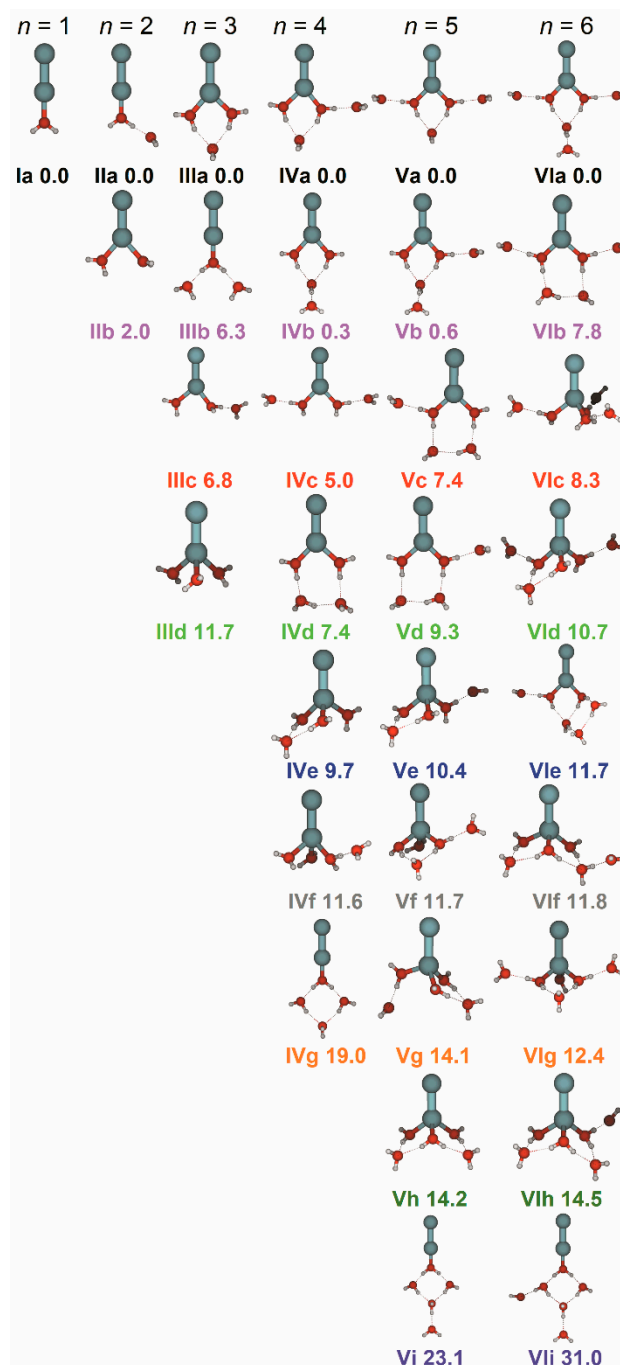

**Figure S6.** Low-lying isomers of  $\text{Zn}_2^+(\text{H}_2\text{O})_n$  clusters ( $n = 1\text{--}6$ ) with water molecules bound to one Zn atom calculated at the B3LYP/aug-cc-pVDZ level of theory along with relative energy given in  $\text{kJ mol}^{-1}$  inclusive of zero-point energy.

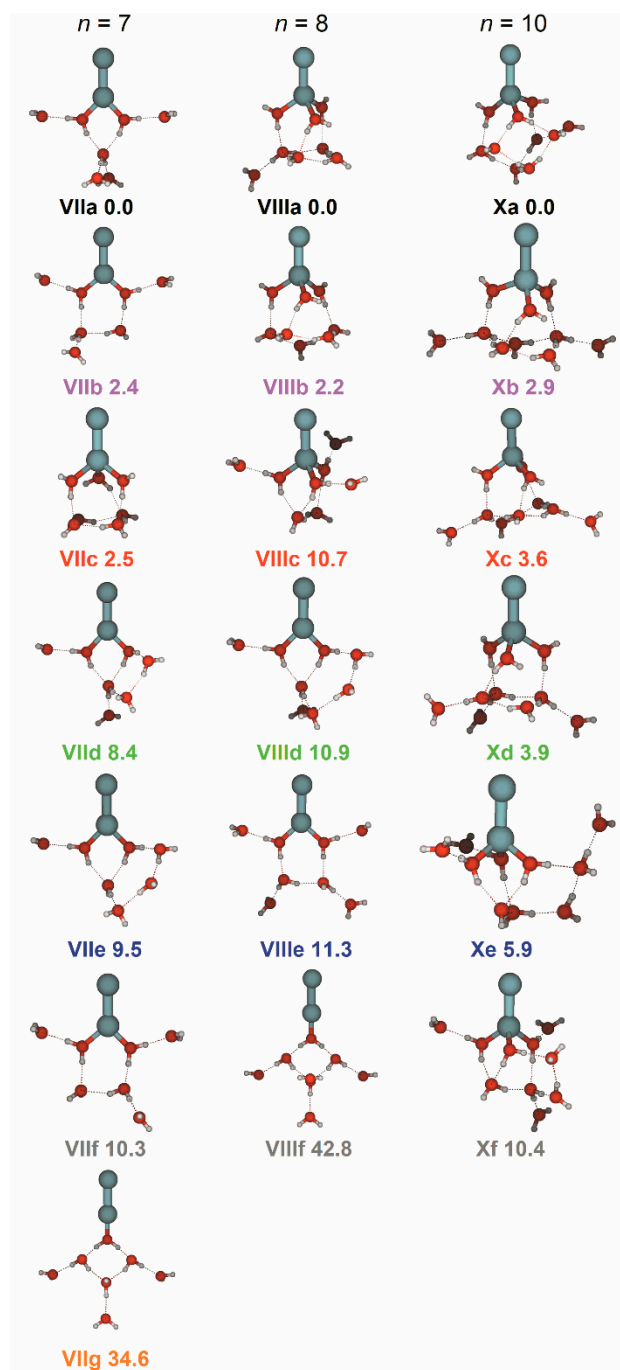

**Figure S7.** Low-lying isomers of  $\text{Zn}_2^+(\text{H}_2\text{O})_n$  clusters ( $n = 7-10$ ) with water molecules bound to one Zn atom calculated at the B3LYP/aug-cc-pVDZ level of theory along with relative energy given in  $\text{kJ mol}^{-1}$  inclusive of zero-point energy.

ii) Coordination to both Zn atoms in  $\text{Zn}_2^+(\text{H}_2\text{O})_n$  clusters

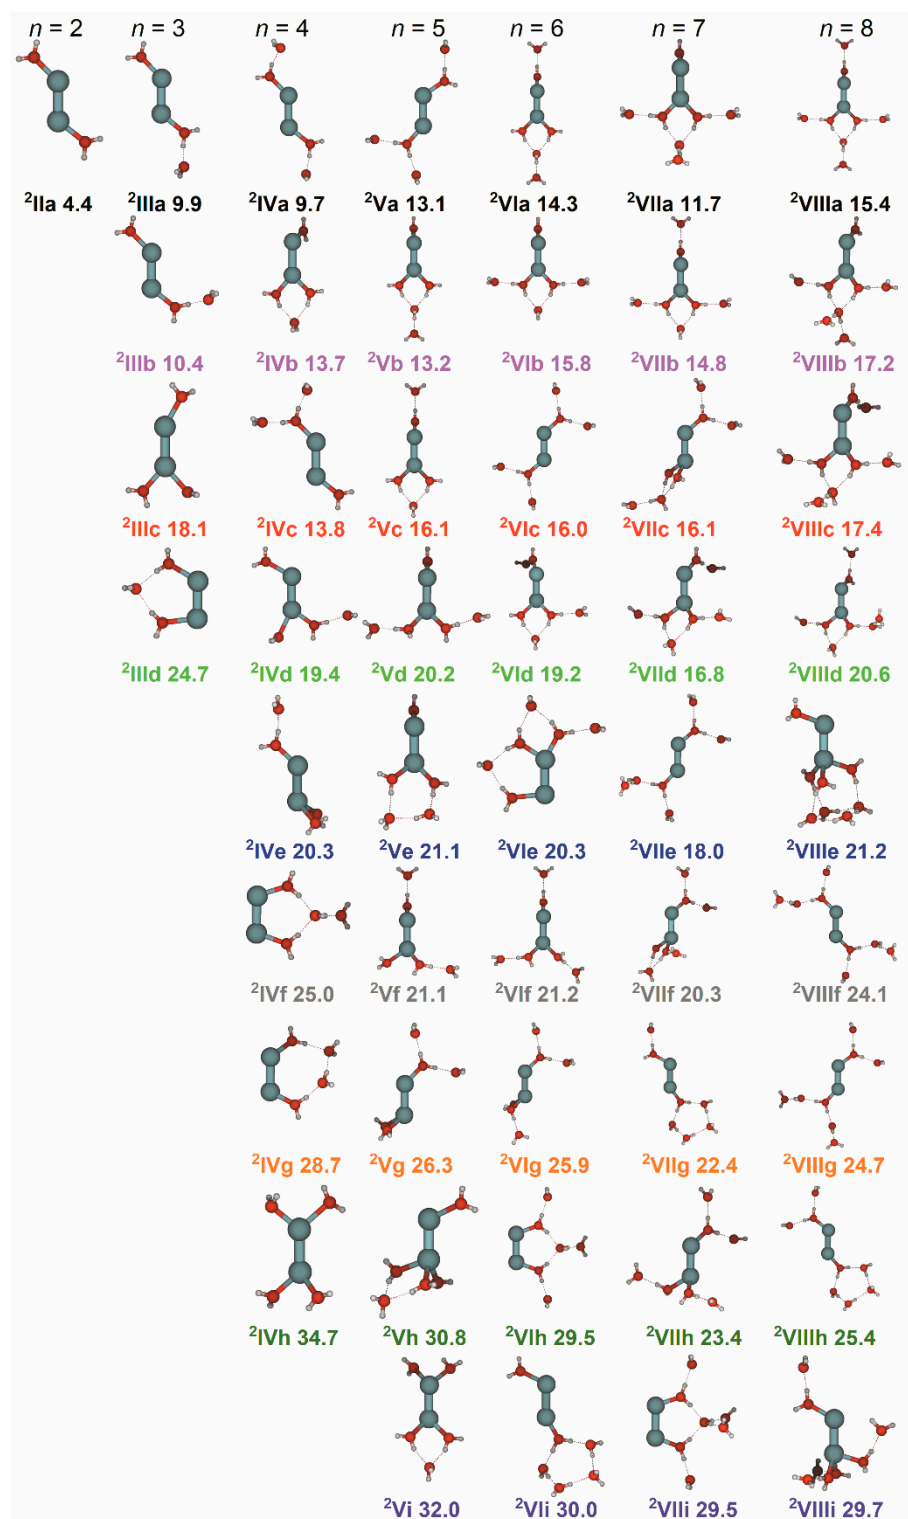

**Figure S8.** Low-lying isomers of  $\text{Zn}_2^+(\text{H}_2\text{O})_n$  clusters ( $n = 2-8$ ) with water molecules bound to both Zn atoms calculated at the B3LYP/aug-cc-pVDZ level of theory along with relative energy given in  $\text{kJ mol}^{-1}$  inclusive of zero-point energy.

Cartesian Coordinates (Å) and electronic energies (Hartree), inclusive of zero-point energy, of optimised  $\text{Zn}_2^+(\text{H}_2\text{O})_n$  clusters ( $n = 1-19$ ) calculated at the B3LYP/aug-cc-pVTZ level of theory.

#### Ia

E= -3635.152988  
 Zn 0.801080 -0.000159 -0.001232  
 O 2.925629 0.000248 0.001914  
 H 3.499859 0.782039 0.002257  
 H 3.500004 -0.781438 0.002272  
 Zn -1.814576 0.000073 0.000570

#### IIa

E= -3711.599567  
 O -2.153296 -0.827019 -0.000204  
 Zn -0.189612 -0.279575 0.000170  
 O -4.132620 0.873662 -0.000035  
 H -2.474237 -1.739685 -0.000652  
 H -2.941571 -0.205668 -0.000181  
 H -4.667919 1.092083 -0.774203  
 H -4.667903 1.091734 0.774243  
 Zn 2.357578 0.259188 -0.000080

#### IIb

E= -3711.598798  
 Zn 0.550423 0.019684 -0.000821  
 O 2.259276 -1.424744 0.000558  
 H 2.436404 -1.980923 0.775056  
 H 2.433994 -1.984768 -0.771708  
 O 2.140247 1.463417 0.000989  
 H 3.078144 1.221893 -0.001196  
 H 2.082333 2.429833 0.000243  
 Zn -2.057991 -0.019531 0.000329

#### <sup>2</sup>IIa

E= -3711.597885  
 Zn 1.204118 -0.506154 0.000074  
 Zn -1.175231 0.444096 0.000195  
 O -3.182674 -0.397686 -0.000529  
 H -3.997569 0.126194 -0.000550  
 H -3.443660 -1.331025 0.000180  
 O 3.101428 0.571612 -0.000322  
 H 3.252760 1.528656 -0.000908  
 H 3.971830 0.146510 0.000026

#### IIIa

E= -3788.045017  
 O 4.034559 -0.000663 0.000113

O 1.627872 -1.424170 -0.000490  
 Zn 0.035036 -0.000309 -0.000222  
 O 1.627580 1.425897 -0.000286  
 H 4.621919 -0.001245 0.769810  
 H 4.622082 -0.001200 -0.769459  
 H 2.574906 -1.175787 -0.000099  
 H 1.553330 -2.387326 -0.000137  
 H 1.550987 2.388900 -0.000510  
 H 2.575108 1.179876 -0.000162  
 Zn -2.562317 -0.000082 0.000417

#### IIIb

E= are -3788.042633  
 O -1.849829 0.000124 -0.001158  
 Zn 0.135078 -0.000452 -0.001819  
 Zn 2.727039 0.000136 0.001106  
 O -3.225964 2.272230 0.001431  
 O -3.226821 -2.271425 0.001452  
 H -2.414426 -0.816732 -0.000010  
 H -2.414030 0.817254 -0.000002  
 H -3.654490 -2.663736 -0.770498  
 H -3.653388 -2.663219 0.774280  
 H -3.653884 2.664391 -0.770460  
 H -3.652379 2.664106 0.774303

#### IIIc

E= -3788.042437  
 O -0.742362 2.438815 -0.394719  
 Zn -0.089194 0.434341 0.085112  
 O -2.101434 0.142718 0.698169  
 O -3.481329 -1.825738 -0.426094  
 H -1.674986 2.698177 -0.375797  
 H -0.238695 3.171968 -0.775578  
 H -2.339009 0.203678 1.634382  
 H -2.631149 -0.609444 0.315193  
 H -4.320343 -1.690136 -0.885197  
 H -3.447670 -2.763636 -0.197822  
 Zn 2.264289 -0.669574 -0.042913

#### IIId

E= -3788.040574  
 Zn 0.374154 0.001936 0.000038  
 H 2.425554 -1.580618 -1.053551  
 H 1.565564 -2.603567 -0.264793  
 O 1.823385 -1.670776 -0.299499  
 O 1.828428 0.573014 1.594582

H 1.574013 1.070504 2.385528  
H 2.429318 -0.126734 1.892269  
O 1.829009 1.091705 -1.295401  
H 2.434588 1.695304 -0.838999  
H 1.574599 1.530779 -2.120200  
Zn -2.235828 0.000157 0.000038

### **<sup>2</sup>IIIa**

E= -3788.041254  
O -3.609284 -0.856510 0.000165  
Zn -1.839151 0.456692 -0.000179  
Zn 0.605998 -0.255452 0.000044  
O 2.423414 0.754882 0.000406  
O 4.765953 -0.465006 -0.000297  
H -4.522692 -0.535380 0.000285  
H -3.648658 -1.824274 0.000573  
H 2.542826 1.714188 0.001299  
H 3.322936 0.326199 0.000129  
H 5.330000 -0.591804 -0.773807  
H 5.329530 -0.593073 0.773347

### **<sup>2</sup>IIIb**

E= -3788.041048  
O 3.613427 -0.057950 -0.000072  
Zn 1.526002 0.668278 0.000057  
Zn -0.499953 -0.872802 -0.000089  
O -2.573767 -0.790124 0.000203  
H 4.389087 0.521305 0.000191  
H 3.940438 -0.969510 -0.000098  
H -3.149469 0.024015 0.000187  
H -3.144905 -1.569819 0.000779  
O -4.021298 1.421170 -0.000085  
H -4.481809 1.772085 -0.773223  
H -4.481711 1.772873 0.772752

### **<sup>2</sup>IIIc**

E= -3788.038116  
O -2.579575 1.431283 -0.136295  
Zn -0.888615 -0.030227 0.388215  
Zn 1.479774 -0.002438 -0.547865  
O -2.477858 -1.427642 -0.166023  
H -2.852633 2.081293 0.528158  
H -2.600299 1.899241 -0.984715  
H -3.396146 -1.123530 -0.204375  
H -2.493425 -2.388615 -0.053629  
O 3.309024 0.047380 0.731016  
H 3.384629 0.055729 1.696261  
H 4.210364 0.047660 0.378218

### **<sup>2</sup>IIId**

E= are -3788.035594  
Zn -0.963678 1.284128 0.000116  
Zn -0.951979 -1.292373 -0.000398  
O 1.139866 -2.035290 0.001680  
O 1.122177 2.045107 0.000427  
O 3.149184 0.013500 -0.000865  
H 1.923382 -1.449245 0.000110  
H 1.446705 -2.952399 -0.000369  
H 1.910543 1.465647 -0.000112  
H 1.421249 2.964758 0.000100  
H 3.739334 0.016350 -0.768970  
H 3.738653 0.015708 0.767771

### **IVa**

E= -3864.486863  
O 1.064775 -2.095556 -0.001588  
Zn -0.148857 -0.335076 0.000258  
O 1.629034 0.715080 -0.000449  
Zn -2.707330 0.074077 0.000042  
O 1.860666 3.377191 -0.000199  
O 3.715423 -1.268001 0.000743  
H 2.043841 -2.062900 0.000387  
H 0.775584 -3.016661 0.002136  
H 2.500870 0.282165 0.000045  
H 1.738357 1.698044 -0.000299  
H 1.946652 3.949203 -0.772977  
H 1.945121 3.949021 0.772880  
H 4.288593 -1.398864 0.769392  
H 4.287424 -1.399750 -0.768635

### **IVb**

E= -3864.486758  
O 3.300534 0.000321 -0.772864  
O 1.008613 -1.408212 -0.386629  
Zn -0.548152 -0.000051 -0.120489  
O 1.008601 1.407898 -0.386987  
Zn -3.110424 0.000052 0.280144  
O 5.266941 -0.000077 1.056672  
H 3.726894 0.000520 -1.640096  
H 4.036405 0.000268 -0.109694  
H 1.941033 1.126205 -0.538590  
H 0.954723 2.371469 -0.379966  
H 0.954905 -2.371807 -0.381329  
H 1.940809 -1.126217 -0.538867  
H 5.761447 0.771622 1.360083  
H 5.763541 -0.771533 1.357272

**IVc**

E= -3864.484963  
O 1.435136 -1.775544 0.181487  
Zn -0.000489 -0.245971 0.000661  
Zn 0.002502 2.347329 -0.000133  
O -1.438267 -1.773333 -0.180207  
O -4.046663 -1.305179 0.076932  
H 1.298475 -2.543987 0.752023  
H 2.413713 -1.618635 0.117112  
H -1.301838 -2.543244 -0.748812  
H -2.416734 -1.615130 -0.117313  
H -4.583236 -1.670846 0.791725  
H -4.664969 -1.023142 -0.608947  
O 4.043781 -1.310783 -0.079796  
H 4.662882 -1.028333 0.605197  
H 4.579412 -1.678704 -0.794138

**IVd**

E= -3864.484046  
O -1.016473 1.580388 0.240890  
Zn 0.377203 0.071377 0.018267  
Zn 2.970403 -0.102444 -0.014783  
O -1.160158 -1.412778 -0.218550  
O -3.591695 1.425505 -0.241071  
O -3.951342 -1.383993 0.218934  
H -1.991594 1.568025 0.023149  
H -0.785857 2.459732 0.566164  
H -2.126023 -1.406895 -0.039104  
H -0.902380 -2.330636 -0.375679  
H -4.270329 -1.573509 1.113201  
H -4.478777 -1.949694 -0.363055  
H -3.982874 0.537082 -0.192130  
H -4.132999 1.954936 -0.838682

**IVe**

E= -3864.483181  
O -3.587497 -1.410142 0.028017  
O -1.580981 -0.075677 -1.447017  
Zn 0.023598 0.305975 -0.002106  
O -0.402951 2.459553 -0.091128  
O -1.639645 0.088858 1.426089  
H -3.665460 -2.373076 0.085792  
H -4.498032 -1.084164 -0.010834  
H -2.384356 -0.494174 1.175842  
H -1.476207 -0.038843 2.370179  
H -1.417421 -0.202880 -2.390702  
H -2.336464 -0.641246 -1.193876  
H 0.256648 3.165650 -0.054115

H -1.255984 2.852080 0.143055  
Zn 2.458598 -0.628778 0.020338

**IVf**

E= -3864.482449  
Zn 0.036191 -0.465000 -0.022793  
O 2.070882 0.159204 -0.217765  
O 0.885083 -1.790494 1.579327  
H 0.389974 -2.067157 2.363730  
H 1.756744 -1.503286 1.890261  
H 0.833820 -3.012333 -0.840799  
H 0.211404 -2.425107 -2.134442  
O 0.672281 -2.184601 -1.317889  
H 2.564149 -0.244222 -0.945561  
H 2.349239 1.109616 -0.167992  
O 2.822032 2.720839 -0.010585  
H 2.641652 3.437089 -0.632426  
H 3.550420 3.025075 0.545601  
Zn -2.232846 0.813025 0.011357

**IVg**

E= -3864.479622  
O -1.128340 0.000111 -0.568644  
Zn 0.802211 -0.000067 -0.153861  
O -2.936608 -1.857991 -0.085008  
O -2.936774 1.858071 -0.084976  
O -5.061925 -0.000063 0.557035  
H -1.722674 0.793247 -0.445536  
H -1.722683 -0.793044 -0.445675  
H -3.782253 1.411233 0.103241  
H -3.145222 2.674088 -0.555545  
H -3.782214 -1.411225 0.102798  
H -3.144789 -2.674174 -0.555410  
H -5.317796 -0.000346 1.490387  
H -5.897458 0.000023 0.069303  
Zn 3.365264 0.000040 0.210167

**IVa**

E= -3864.483155  
O 2.965026 -0.808537 -0.000399  
Zn 1.216576 0.351272 -0.000766  
Zn -1.216593 -0.350664 -0.000084  
O -2.965397 0.808647 -0.000131  
O 5.415810 0.217793 0.001925  
H 3.891534 -0.450442 -0.002240  
H 3.013411 -1.773686 -0.003605  
H -3.014055 1.773789 -0.000385  
H -3.891791 0.450270 0.000378

H 5.983583 0.335610 -0.769914  
H 5.980298 0.329939 0.777012  
O -5.415399 -0.219544 0.001253  
H -5.981705 -0.335595 -0.771934  
H -5.981061 -0.334985 0.775004

#### **<sup>2</sup>IVb**

E= -3864.481653  
O -4.390251 -0.008415 -0.191658  
O -1.968218 -1.439817 -0.074060  
Zn -0.374173 -0.027058 0.366136  
Zn 1.971132 0.094398 -0.607339  
O -1.985266 1.416930 0.148999  
H -4.871517 0.053703 -1.029083  
H -5.072801 -0.067007 0.491857  
H -2.912355 -1.191142 -0.122045  
H -1.902835 -2.402868 -0.046295  
H -1.931436 2.365244 0.323016  
H -2.926320 1.167267 0.062353  
O 3.750942 -0.162787 0.783733  
H 3.783881 -0.264327 1.745607  
H 4.666990 -0.128346 0.474573

#### **<sup>2</sup>IVc**

E= -3864.481596  
O -2.189339 0.012427 -0.000187  
Zn -0.233576 -0.488560 0.000396  
Zn 2.097104 0.513955 -0.000763  
O 3.911062 -0.788263 0.001033  
O -3.023478 2.564890 0.000651  
H -2.931489 -0.640070 -0.000254  
H -2.546601 0.934297 0.000256  
H 3.973620 -1.754320 0.002297  
H 4.816495 -0.446668 0.000744  
H -3.362322 3.036096 -0.770978  
H -3.361453 3.036852 0.772196  
O -4.109387 -1.863146 -0.000484  
H -4.602897 -2.167475 0.771390  
H -4.602077 -2.167827 -0.772743

#### **<sup>2</sup>IVd**

E= -3864.479461  
O 3.492373 -0.789384 -0.785456  
Zn 1.728409 -0.348778 0.557996  
Zn -0.462199 0.553097 -0.355126  
O -2.420495 -0.000577 0.135415  
O -3.487634 -2.442976 -0.036182  
H 4.334126 -1.134454 -0.455928  
H 3.558299 -0.764503 -1.750838

H -2.840028 -0.895399 0.057915  
H -3.117754 0.668085 0.124415  
H -3.796460 -2.946072 0.727920  
H -3.920697 -2.829627 -0.807611  
O -1.314075 2.652054 0.126956  
H -1.200988 3.053060 1.001569  
H -1.164160 3.366398 -0.509388

#### **<sup>2</sup>IVe**

E= -3864.479122  
O -2.683378 -0.013329 0.755406  
Zn -0.897995 0.016152 -0.370136  
Zn 1.495062 -0.064813 0.447489  
O 3.102602 1.461692 -0.295472  
O 3.028370 -1.384148 -0.441196  
O -5.151900 0.030513 -0.257035  
H -3.600180 0.002952 0.379387  
H -2.754589 -0.103848 1.714790  
H 3.134192 -2.336759 -0.309763  
H 3.910880 -1.011220 -0.579510  
H -5.696262 -0.725181 -0.510158  
H -5.704613 0.814864 -0.361400  
H 2.964559 1.981109 -1.101362  
H 3.468451 2.080068 0.353820

#### **<sup>2</sup>IVf**

E= -3864.477328  
O 0.581634 1.986010 0.360238  
Zn -1.438859 1.286729 -0.136452  
Zn -1.441376 -1.285896 -0.136603  
O 0.579555 -1.985906 0.360960  
O 2.455471 -0.000706 0.847564  
H 1.328547 1.371989 0.550805  
H 0.887687 2.893994 0.485770  
H 1.327039 -1.372443 0.551002  
H 0.885445 -2.894079 0.485515  
H 2.810433 -0.000939 1.746999  
H 3.247451 -0.001194 0.252915  
O 4.598288 -0.001789 -0.784778  
H 5.100381 0.769585 -1.076178  
H 5.100488 -0.772771 -1.077024

#### **<sup>2</sup>IVg**

E= -3864.475920  
Zn 1.826581 0.338670 -0.279131  
Zn 0.252183 -1.593849 0.363643  
O -1.838073 -1.675540 -0.414440  
H -2.347465 -2.492322 -0.507947  
H -2.471749 -0.927658 -0.426941

O 1.016892 2.289729 -0.095488  
H 0.078388 2.430237 0.195741  
H 1.377446 3.123718 -0.423540  
O -3.517875 0.632932 -0.460070  
H -4.337271 0.562575 0.050841  
H -3.800136 0.888536 -1.350337  
O -1.503528 2.391405 0.747357  
H -2.254999 1.923039 0.344712  
H -1.866454 3.039028 1.363242

#### **IVh**

E= -3864.473642  
O -2.847018 1.408905 0.411988  
Zn -1.167061 -0.017882 -0.489967  
Zn 1.166924 -0.019791 0.491261  
O -2.767478 -1.416841 0.178349  
O 2.846104 1.410282 -0.412558  
H -3.225754 2.086387 -0.166619  
H -2.733390 1.836469 1.273363  
H -2.940861 -2.311110 -0.147350  
H -3.624974 -1.003040 0.353740  
H 2.728207 1.838574 -1.272979  
H 3.225308 2.088019 0.165430  
O 2.768950 -1.414813 -0.181581  
H 3.624354 -0.997106 -0.358011  
H 2.946752 -2.308257 0.144006

#### **Va**

E= -3940.927277  
O 3.790768 0.005081 0.001073  
O 1.332452 -1.429390 0.000662  
Zn -0.164825 -0.000257 -0.000565  
O 1.328979 1.432112 -0.001490  
Zn -2.749885 -0.002935 0.000448  
O 1.017341 4.101540 0.000229  
H 4.377397 0.004352 0.770154  
H 4.378754 0.006612 -0.766969  
H 2.277468 -1.192745 -0.000240  
H 1.229377 -2.410535 0.000197  
H 1.223867 2.413075 -0.000721  
H 2.274512 1.197402 0.000528  
H 0.918919 4.671422 0.772928  
H 0.920328 4.672133 -0.772125  
O 1.028340 -4.100083 -0.000380  
H 0.928780 -4.669826 -0.773035  
H 0.928876 -4.670193 0.772018

#### **Vb**

E= -3940.927067  
O 3.206557 -0.499089 -0.772083  
O 0.841457 -1.771114 -0.472213  
Zn -0.619822 -0.275527 -0.118205  
Zn -3.177250 -0.316642 0.273690  
O 0.945358 1.046919 -0.255218  
O 5.205778 -0.813587 1.019534  
O 0.820767 3.721549 -0.005308  
H 3.625475 -0.448230 -1.640981  
H 3.944782 -0.609233 -0.124764  
H 1.860559 0.742230 -0.420226  
H 0.915326 2.028343 -0.164376  
H 0.729632 -2.725243 -0.558843  
H 1.787255 -1.528565 -0.614117  
H 5.748978 -0.113122 1.401598  
H 5.648461 -1.643514 1.236568  
H 0.837231 4.228337 0.815874  
H 0.655120 4.356666 -0.712954

#### **Vc**

E= -3940.924477  
O 0.850843 -2.004813 0.024657  
Zn -0.424985 -0.368204 0.030255  
Zn -3.010401 -0.176528 0.020157  
O 1.118901 1.015619 -0.027311  
O 3.464519 -1.989023 -0.275974  
O 0.629121 3.665313 -0.206979  
O 3.962462 0.740668 0.347233  
H 1.837203 -2.040494 -0.125841  
H 0.540389 -2.896068 0.226562  
H 2.077831 0.905150 0.123912  
H 0.926792 1.981521 -0.085248  
H 0.459316 4.145733 -1.027053  
H 0.340840 4.245899 0.508497  
H 4.301764 0.855938 1.246215  
H 4.491448 1.337032 -0.201016  
H 3.881087 -1.115446 -0.174986  
H 3.998148 -2.499409 -0.896403

#### **Vd**

E= -3940.923742  
O -0.966369 1.248813 -0.081135  
Zn 0.386687 -0.234349 -0.019867  
Zn 2.963015 -0.525340 -0.002276  
O -1.094161 -1.816684 0.020001  
O -3.622551 0.947343 -0.083694  
O -0.126557 3.804433 0.117990  
O -3.924914 -1.900867 0.102239  
H -1.953777 1.177413 -0.104329  
H -0.702667 2.195943 -0.009071



H -2.074566 -1.838197 0.055505  
H -0.786009 -2.731417 0.052125  
H 0.004306 4.416481 -0.616917  
H -0.150744 4.345318 0.917212  
H -4.326820 -2.189500 0.934083  
H -4.359979 -2.423555 -0.586199  
H -3.978558 0.043659 -0.110234  
H -4.285810 1.530237 -0.471069

### Ve

E= -3940.923331  
O 1.743628 0.494987 -1.442850  
Zn 0.124582 0.029030 -0.002380  
O 1.737428 0.500397 1.445057  
O -0.518899 2.030734 -0.012704  
O -3.072741 2.861961 0.006657  
O 4.122296 -0.037708 0.005988  
H 1.642379 0.290951 -2.381893  
H 2.656021 0.255166 -1.188577  
H -1.451047 2.358118 -0.004014  
H 0.075061 2.791778 -0.007472  
H 1.633028 0.294694 2.383400  
H 2.651038 0.261778 1.194053  
H 4.576516 -0.892045 0.009515  
H 4.827588 0.624885 0.004983  
H -3.569133 3.154473 0.781137  
H -3.576031 3.154889 -0.763215  
Zn -1.509885 -1.998951 0.000877

### Vf

E= -3940.922818  
O -3.513952 -0.929664 -1.173265  
O -1.014857 -2.028337 -0.526741  
Zn 0.184759 -0.370780 0.235442  
O -1.639449 0.745186 0.269396  
O -0.340512 -0.854953 2.332454  
O -1.654856 3.440523 -0.000864  
H -3.802382 -0.742175 -2.077436  
H -4.301978 -1.260036 -0.719404  
H -1.908703 -1.868621 -0.888987  
H -0.643054 -2.801672 -0.969274  
H -1.634761 1.724333 0.152614  
H -2.394502 0.390659 -0.234018  
H 0.298008 -1.044161 3.033577  
H -1.049213 -0.328576 2.729126  
H -1.220051 3.983364 -0.670114  
H -2.061546 4.056799 0.620932  
Zn 2.616148 0.201048 -0.508271

### Vg

E= -3940.921897  
O -1.096071 -0.865078 1.457512  
Zn 0.231085 0.129631 0.000447  
O -0.930347 1.893676 -0.001651  
O -1.095125 -0.864900 -1.457581  
O -3.614017 2.219031 0.000453  
O -2.238583 -3.013708 -0.000455  
H -0.830058 -0.949752 2.382471  
H -1.506731 -1.710963 1.192289  
H -0.532187 2.772303 0.000851  
H -1.913158 2.003365 -0.000581  
H -0.829628 -0.947629 -2.382859  
H -1.505141 -1.711480 -1.193679  
H -1.890264 -3.916392 0.000234  
H -3.201172 -3.112504 -0.001246  
H -4.091882 2.550723 0.771453  
H -4.092162 2.552278 -0.769705  
Zn 2.841766 0.120965 0.000038

### Vh

E= -3940.921866  
O 2.664774 2.597482 -0.595944  
O 0.821097 1.639276 1.331094  
Zn -0.200746 -0.001119 0.274317  
O 1.512723 0.001284 -1.064296  
O 0.824714 -1.639336 1.329817  
O 2.670497 -2.593087 -0.596647  
H 2.438889 3.288749 -1.234376  
H 3.581516 2.776684 -0.344162  
H 1.443222 2.183726 0.809713  
H 0.343645 2.231328 1.927128  
H 2.085792 -0.787329 -1.063618  
H 2.083448 0.791625 -1.062973  
H 2.446690 -3.284561 -1.235585  
H 3.587317 -2.770567 -0.343922  
H 1.447806 -2.181833 0.807493  
H 0.347981 -2.233272 1.924558  
Zn -2.724479 -0.000865 -0.388199

### Vi

E= -3940.918477  
O -0.470404 -0.000065 -0.570400  
Zn 1.454863 -0.000368 -0.175162  
O -2.243029 -1.835954 0.028090  
O -2.242565 1.836489 0.027634  
O -4.214792 0.000623 0.830390  
O -6.692713 -0.000482 -0.306844

H -1.061698 0.793623 -0.411172  
H -1.061978 -0.793516 -0.410918  
H -2.529092 2.595777 -0.493466  
H -3.048473 1.342413 0.286982  
H -3.048645 -1.341512 0.287671  
H -2.530035 -2.594796 -0.493399  
H -4.359423 0.001076 1.785667  
H -5.115997 0.000277 0.431262  
H -7.262151 0.769882 -0.425394  
H -7.262856 -0.770811 -0.422185  
Zn 4.018082 0.000125 0.168295

#### <sup>2</sup>Va

E= -3940.922298  
O -2.750631 0.078737 0.001751  
Zn -0.827365 -0.579242 -0.002527  
Zn 1.504860 0.382038 0.002409  
O 3.269837 -0.791852 -0.004312  
O 5.754948 0.192781 0.001910  
O -4.838724 -1.629555 0.003171  
H -3.539758 -0.512664 -0.001204  
H -3.039067 1.022569 0.000178  
H 3.316836 -1.756701 -0.010050  
H 4.195530 -0.439705 -0.002205  
H -5.338125 -1.929310 -0.766389  
H -5.332599 -1.925404 0.777794  
H 6.309777 0.357978 -0.770320  
H 6.309281 0.349080 0.776346  
O -3.408516 2.695877 -0.001995  
H -3.711187 3.190443 -0.773807  
H -3.710862 3.191933 0.768990

#### <sup>2</sup>Vb

E= -3940.922255  
Zn 2.617153 0.004794 0.477752  
Zn 0.168821 -0.002538 -0.194196  
O 4.173228 -0.010623 -1.203767  
H 5.125098 -0.008790 -1.032204  
H 4.062876 -0.020766 -2.164982  
O -1.377956 -1.413998 0.304394  
H -2.305123 -1.127771 0.465671  
H -1.353718 -2.372518 0.197082  
O -1.376743 1.418625 0.280238  
H -1.351279 2.375276 0.157647  
H -2.304133 1.136306 0.446939  
O -3.670220 0.007428 0.765960  
H -4.027260 0.014670 1.663676  
H -4.454167 0.002176 0.164305  
O -5.792145 -0.007323 -0.905681  
H -6.309768 0.761705 -1.174888

H -6.311061 -0.780841 -1.159076  
<sup>2</sup>Vc

E= -3940.921142  
O -2.537981 -1.442996 0.049484  
Zn -0.951884 -0.002089 -0.443224  
Zn 1.388474 0.008684 0.511332  
O 3.136446 -0.012727 -0.729264  
O 5.683819 -0.002584 0.126763  
O -4.955573 -0.001942 0.323360  
H -3.478101 -1.189341 0.126377  
H -2.491239 -2.394977 -0.105267  
H 3.160113 -0.021359 -1.694817  
H 4.070224 -0.008652 -0.404622  
H -5.403184 0.002544 1.181261  
H -5.664251 -0.006225 -0.335245  
H 6.199037 0.772676 0.381472  
H 6.199695 -0.772852 0.394938  
O -2.540927 1.440641 0.033391  
H -2.495730 2.391206 -0.130182  
H -3.480536 1.185987 0.112973

#### <sup>2</sup>Vd

E= -3940.919566  
O 2.467485 -0.586690 -0.127062  
Zn 0.405653 -0.330809 0.332774  
Zn -1.343510 1.254937 -0.590522  
O -2.331512 2.705871 0.897914  
O 0.343914 -2.476400 0.228244  
O -1.973382 -3.786665 -0.153339  
O 4.272798 1.403887 -0.102286  
H 2.754085 -1.263405 -0.754773  
H 3.135072 0.143119 -0.146766  
H 0.901578 -3.002174 0.817177  
H -0.507339 -2.969508 0.120600  
H -2.633630 -4.028972 0.507863  
H -2.129134 -4.362275 -0.912691  
H -2.134801 2.878073 1.829443  
H -2.993618 3.357225 0.628320  
H 4.497630 2.005452 -0.822960  
H 5.011431 1.438619 0.518461

#### <sup>2</sup>Ve

E= -3940.919235  
O -4.326259 -1.423544 0.171915  
O -1.491774 -1.393925 -0.147604  
Zn 0.041198 0.095893 0.340109  
Zn 2.385901 -0.069723 -0.626811  
O 4.135291 -0.129575 0.857821  
O -1.400607 1.613924 0.252757

O -3.971908 1.381392 -0.325286  
H -4.695325 -1.589428 1.051105  
H -4.811169 -2.013826 -0.421952  
H -4.332586 0.479279 -0.288480  
H -4.459525 1.861905 -1.004843  
H -1.205085 -2.307336 -0.275709  
H -2.459271 -1.416109 0.005888  
H -1.250849 2.472990 0.666810  
H -2.362164 1.556791 -0.000867  
H 5.058165 -0.151862 0.569196  
H 4.146890 -0.063668 1.823077

#### <sup>2</sup>Vf

E= -3940.919240  
O -2.927092 0.281975 -0.258575  
Zn -1.081603 -0.500192 0.388782  
Zn 1.245715 -0.044873 -0.473677  
O 2.957014 0.238532 0.773797  
O 5.451551 0.734190 -0.081979  
O -3.791605 2.811474 -0.009691  
H -3.678919 -0.321888 -0.316566  
H -3.270323 1.203713 -0.153148  
H 2.971826 0.236798 1.739619  
H 3.875697 0.422539 0.457065  
H -4.006920 3.380229 -0.759438  
H -4.213617 3.209594 0.761793  
H 6.128231 0.079162 -0.292576  
H 5.834455 1.597128 -0.281999  
O -2.222617 -2.483558 -0.182097  
H -2.258102 -3.186076 0.482935  
H -2.043689 -2.930175 -1.022502

#### <sup>2</sup>Vg

E= -3940.917251  
O 2.476660 0.042267 0.028801  
Zn 0.534189 -0.596249 -0.027386  
Zn -1.747015 0.475593 0.005987  
O -3.317777 -0.172082 -1.447377  
O 4.563747 -1.678490 -0.091801  
O 3.195726 2.650879 0.142987  
H 3.256757 -0.557544 -0.014370  
H 2.781540 0.979086 0.068906  
H -3.484113 0.200471 -2.324387  
H -4.179115 -0.358740 -1.046878  
H 3.515172 3.096216 0.937671  
H 3.534310 3.161923 -0.602721  
H 5.023650 -1.973504 -0.887262  
H 5.054657 -2.043093 0.654761  
O -3.423765 -0.529045 1.369635  
H -3.284150 -1.406139 1.755285

H -3.790654 0.012752 2.083004  
<sup>2</sup>Vh

E= are -3940.915534  
O 3.959330 -1.357174 0.205991  
O 1.841235 -0.089544 1.606530  
Zn 0.264662 0.393251 0.141906  
O 1.857835 -0.255258 -1.369858  
Zn -2.016548 -0.565782 -0.493568  
O 1.244024 2.338135 -0.347423  
O -3.771816 -0.021331 0.952117  
H 4.148903 -2.304338 0.260640  
H 4.825259 -0.925536 0.191091  
H 2.640551 -0.727698 -1.024761  
H 1.567380 -0.734142 -2.157244  
H 1.649790 -0.254359 2.538701  
H 2.639395 -0.598862 1.367238  
H 0.807265 3.198616 -0.282296  
H 1.750206 2.339519 -1.172737  
H -3.851744 0.604374 1.685623  
H -4.665289 -0.340261 0.764733

#### <sup>2</sup>Vi

E= -3940.915102  
O 3.149445 -1.492192 -0.182900  
Zn 1.633457 -0.007206 0.618004  
O 3.404134 1.278780 -0.621330  
Zn -0.670761 0.082423 -0.421779  
O -2.298736 1.406126 0.264337  
O -2.274364 -1.439619 -0.240993  
O -4.713180 -0.062731 0.213685  
H 3.214820 1.695416 -1.473929  
H 3.884721 1.945636 -0.110920  
H 3.481588 -2.262223 0.299128  
H 3.922020 -0.988605 -0.480783  
H -2.253446 2.364768 0.367995  
H -3.237548 1.137891 0.281162  
H -5.400040 0.064914 -0.455504  
H -5.188342 -0.232187 1.039365  
H -3.216205 -1.193582 -0.161747  
H -2.226844 -2.311475 -0.653918

#### VIa

E= -4017.366073  
O 3.172524 -0.003615 -0.691822  
O 0.832869 1.417951 -0.306446  
Zn -0.644610 0.003756 -0.064720  
O 0.825950 -1.417863 -0.312062  
Zn -3.197015 0.000667 0.332838

O 0.584457 -4.111257 -0.321408  
H 3.596676 -0.004566 -1.559255  
H 3.908543 -0.005658 -0.036062  
H 1.762998 1.146585 -0.451346  
H 0.752005 2.398768 -0.308797  
H 0.741926 -2.398355 -0.311768  
H 1.757631 -1.150282 -0.453397  
H 0.517050 -4.685759 0.451119  
H 0.342674 -4.653552 -1.082315  
O 0.599633 4.111432 -0.321132  
H 0.357145 4.653822 -1.081729  
H 0.535353 4.686388 0.451313  
O 5.187082 -0.009039 1.134299  
H 5.675553 -0.781497 1.444416  
H 5.681060 0.760544 1.442846

#### VIIb

E= -4017.363103  
O -0.731751 1.696963 -0.105597  
Zn 0.398585 0.014993 -0.014842  
Zn 2.940020 -0.466938 0.027157  
O -1.220537 -1.293436 -0.058468  
O -3.317718 1.713110 0.595763  
O 0.481666 4.123651 -0.165101  
O -0.917401 -3.982444 0.127096  
O -4.052189 -0.854946 -0.396854  
H -1.683743 1.776144 0.153604  
H -0.319908 2.590322 -0.112714  
H -2.173595 -1.120972 -0.182015  
H -1.091208 -2.267880 0.003289  
H -0.632001 -4.569305 -0.584367  
H -0.754515 -4.461515 0.949339  
H 0.564946 4.689174 -0.942743  
H 0.748944 4.662939 0.589337  
H -4.608375 -1.410710 0.166716  
H -4.398499 -0.973476 -1.292200  
H -3.822425 0.961271 0.241545  
H -3.924346 2.459172 0.666039

#### VIIc

E= -4017.362923  
O 1.624536 0.420834 -1.517224  
Zn 0.000355 -0.000300 -0.156466  
Zn -0.001165 0.007054 2.439774  
O -0.442418 -1.622192 -1.513308  
O -1.179656 1.189282 -1.520275  
O 3.980012 1.508654 -0.756469  
O -3.299122 2.686878 -0.761835  
H -1.937620 1.754427 -1.235871  
H -0.633525 1.723068 -2.113535

H -1.178555 -1.417516 -2.106066  
H -0.553412 -2.559971 -1.225152  
H 1.814624 -0.321694 -2.106856  
H 2.492506 0.795061 -1.231980  
H 4.433091 2.217949 -1.229031  
H 4.605222 1.182088 -0.097723  
H -3.328364 3.393726 -0.105341  
H -4.140805 2.722312 -1.233011  
O -0.680725 -4.203514 -0.745107  
H -0.292491 -4.952153 -1.214712  
H -1.277393 -4.579472 -0.086214

#### VId

E= -4017.361982  
O 3.756356 -0.626656 -1.319679  
O 1.032355 -0.889837 -1.986709  
Zn -0.068963 -0.079565 -0.250626  
O -0.581182 -2.004897 0.469040  
O 1.798622 -0.287235 0.795478  
O -3.068702 -2.909084 1.013983  
O 2.379031 1.273085 2.950329  
H 0.699569 -0.800957 -2.888633  
H 2.004892 -0.802890 -2.017362  
H 1.995835 0.288225 1.569688  
H 2.605413 -0.328335 0.251703  
H 4.331638 0.087783 -1.626447  
H 4.311372 -1.418928 -1.323095  
H 0.049869 -2.468640 1.034109  
H -1.486209 -2.324953 0.694152  
H 2.216012 2.217323 3.065871  
H 2.664080 0.943756 3.811690  
H -3.655943 -2.683988 1.745838  
H -3.497424 -3.628710 0.534560  
Zn -1.756736 1.895475 -0.423761

#### VIIe

E= -4017.361623  
O 2.962949 1.113172 0.889856  
O 0.307117 1.702993 0.087750  
Zn -0.697168 -0.120196 0.214230  
Zn -3.111023 -0.956050 -0.183717  
O 1.056450 -0.948207 0.973308  
O 2.634721 -2.504037 -0.552127  
O 4.728980 -0.412134 -0.791504  
H 3.418536 1.590466 1.594980  
H 3.659680 0.732287 0.319471  
H 1.264400 1.769397 0.261171  
H -0.056410 2.586432 -0.153915  
H 1.530232 -1.652631 0.465595  
H 1.746244 -0.285368 1.178236

H 2.841588 -3.446069 -0.529052  
H 3.471417 -2.031942 -0.695926  
H 4.850333 -0.112180 -1.703493  
H 5.623176 -0.593881 -0.469486  
O -0.703261 4.116491 -0.575008  
H -1.135502 4.736070 0.025718  
H -0.863604 4.448595 -1.466867

#### **VI f**

E= -4017.361574  
O 0.158539 3.698720 -1.092553  
O -0.957317 2.161595 1.008168  
Zn -0.604979 0.086561 0.329209  
O 0.941795 -0.366122 1.789741  
O 0.977341 0.917031 -0.893159  
O 3.277928 -0.022069 0.388749  
O 4.564289 -2.109606 -0.759510  
H 1.887757 0.713197 -0.592082  
H 0.929447 1.869567 -1.088350  
H -1.781671 2.409905 1.446719  
H -0.743322 2.864769 0.364075  
H -0.337879 3.943278 -1.886181  
H 0.705446 4.470253 -0.889520  
H 5.012826 -2.835748 -0.308723  
H 4.821269 -2.171301 -1.687869  
H 1.864417 -0.368368 1.447829  
H 0.848895 -1.108540 2.400134  
H 3.959800 0.553429 0.757989  
H 3.761848 -0.776074 -0.026237  
Zn -2.482669 -1.546586 -0.444851

#### **VI g**

E= -4017.361336  
O 3.560619 0.825745 -0.716142  
O 0.917873 1.716083 -0.068523  
Zn -0.176659 -0.030700 0.341740  
O 0.397387 -0.043576 2.504652  
O 1.659955 -1.141125 0.171230  
O -0.121710 4.149351 -0.664179  
O 1.746643 -3.650098 -0.879771  
H 1.671994 -2.046067 -0.216857  
H 2.424663 -0.656310 -0.190798  
H 0.536675 2.592431 -0.301961  
H 1.846310 1.681941 -0.356719  
H 3.916849 0.858230 -1.614604  
H 4.302564 1.058868 -0.141244  
H 1.064255 -0.719209 2.694033  
H -0.237486 -0.065741 3.233605  
H -0.614979 4.416062 -1.449563  
H -0.205440 4.875915 -0.034421

H 1.254701 -3.994039 -1.635606  
H 2.142153 -4.417354 -0.447759  
Zn -2.602954 -0.583825 -0.418948

#### **VI h**

E= -4017.360533  
O -2.450842 2.416297 -1.433367  
O -1.734499 -0.324639 -1.047039  
Zn 0.100242 -0.196568 0.127335  
O -1.163359 -0.905813 1.826663  
O -0.279698 1.866744 0.385787  
O 1.651400 3.690922 0.958815  
O -3.224820 -2.305915 0.443840  
H -2.297918 2.783458 -2.315159  
H -3.251483 2.853613 -1.112687  
H -2.179963 0.518891 -1.252079  
H -2.409444 -0.948711 -0.724792  
H 0.433889 2.518190 0.573824  
H -0.944017 2.295397 -0.181798  
H -1.872814 -1.527474 1.573759  
H -0.748947 -1.255441 2.626527  
H -4.144837 -2.225520 0.731349  
H -3.132920 -3.222328 0.147412  
H 2.477252 3.871388 0.493238  
H 1.708897 4.162234 1.799166  
Zn 2.365653 -1.314247 -0.508547

#### **VI i**

E= -4017.354270  
O -0.206872 -0.171942 -0.628988  
Zn 1.693372 -0.110975 -0.188081  
O -2.037793 1.223660 0.502614  
O -1.728011 -2.314799 -0.528027  
O -3.136811 3.642569 -0.296294  
O -3.777821 -1.037104 0.877503  
O -6.351641 -1.033630 -0.060349  
H -0.880485 0.472977 -0.220168  
H -0.698031 -1.041419 -0.694030  
H -2.418275 2.069483 0.189718  
H -2.777993 0.608525 0.660624  
H -2.547961 -2.002709 -0.088340  
H -1.996631 -2.900415 -1.245516  
H -3.831233 -1.306310 1.803481  
H -4.707060 -1.036674 0.553888  
H -6.969096 -0.294339 0.000016  
H -6.888641 -1.811594 -0.255248  
H -3.204806 4.005853 -1.187720  
H -3.169072 4.401186 0.299659  
Zn 4.239991 -0.010178 0.229813

**<sup>2</sup>Via**

E= -4017.360615  
Zn -2.009304 0.001649 -0.526571  
Zn 0.397762 -0.002440 0.232605  
O 1.941500 1.425377 -0.323143  
O 1.944103 -1.424630 -0.328755  
O 4.256353 0.002794 -0.735770  
O 6.366173 -0.000029 0.964286  
O -3.622691 -0.001536 0.903913  
O -6.259718 0.000349 0.341195  
H -6.777775 0.774031 0.087165  
H -6.777509 -0.770376 0.077809  
H -3.543504 -0.007250 1.866378  
H -4.585013 -0.001011 0.681612  
H 2.873965 -1.133670 -0.456557  
H 1.935137 -2.371173 -0.141848  
H 2.872280 1.137797 -0.451547  
H 1.929592 2.371670 -0.135074  
H 5.032590 0.001692 -0.126154  
H 4.623024 0.003896 -1.629431  
H 6.879213 -0.771426 1.235185  
H 6.878527 0.770958 1.237641

**<sup>2</sup>Vib**

E= -4017.360048  
O -1.622716 -1.450433 0.069722  
Zn -0.115633 0.000943 0.232116  
O -1.660968 1.410809 0.069769  
Zn 2.262315 0.031115 -0.641807  
O 3.890844 0.026159 1.036881  
O -1.463149 4.113798 0.044468  
O -4.112450 -0.052385 -0.083859  
H -2.567598 -1.224028 0.012488  
H -1.515915 -2.428409 0.064212  
H -2.599302 1.157880 0.015217  
H -1.582714 2.391546 0.068220  
H -1.404795 4.700311 0.808541  
H -1.283794 4.660858 -0.730063  
H -4.642917 -0.057064 -0.892368  
H -4.752538 -0.061982 0.640867  
H 3.820156 0.041759 2.001371  
H 4.834644 0.043511 0.828069  
O -1.320918 -4.143936 0.039137  
H -1.132978 -4.686429 -0.736539  
H -1.257839 -4.731798 0.801769

**<sup>2</sup>Vic**

E= -4017.359969

O -3.037451 0.060488 -0.001300  
Zn -1.098618 -0.608216 0.000807  
Zn 1.098359 0.607402 0.001775  
O 3.037555 -0.060569 -0.002472  
O 3.726255 -2.684636 0.002798  
O -5.190234 -1.592742 -0.004268  
O 5.188833 1.595246 -0.004608  
H -3.827341 -0.526375 -0.002317  
H -3.328120 1.002017 -0.000021  
H 3.328727 -1.001938 -0.000239  
H 3.827059 0.526734 -0.003063  
H -5.621557 -1.977648 -0.776863  
H -5.623029 -1.978308 0.767174  
H 5.622876 1.976818 -0.777335  
H 5.621520 1.981452 0.766575  
H 4.052694 -3.164744 -0.768346  
H 4.056149 -3.163043 0.773533  
O -3.724297 2.684973 0.002103  
H -4.053156 3.164706 -0.768235  
H -4.053347 3.162655 0.773632

**<sup>2</sup>VId**

E= -4017.358743  
O -1.696426 -2.146034 -0.269668  
Zn -0.465480 -0.371719 0.175791  
Zn 1.554275 0.396404 -1.120741  
O -2.336141 0.589680 0.356107  
O -2.812983 3.231349 0.733306  
O -4.385182 -1.436992 0.136970  
H -2.663365 -2.155177 -0.127755  
H -1.378363 -3.057340 -0.265117  
H -3.187222 0.120508 0.327733  
H -2.498665 1.549560 0.499933  
H -2.792600 3.709852 1.571081  
H -2.840201 3.902160 0.040013  
H -4.992223 -1.451926 -0.615906  
H -4.916113 -1.706251 0.899120  
O 4.492080 -0.662876 2.033002  
O 3.565901 0.342132 -0.311562  
H 4.980274 -1.491666 2.114346  
H 4.773184 -0.113765 2.775502  
H 3.911483 -0.023067 0.537860  
H 4.321969 0.638471 -0.833574

**<sup>2</sup>VIe**

E= -4017.358340  
Zn 1.813256 -1.654403 -0.001171  
Zn -0.335008 -0.288497 -0.001185  
O -2.402285 -0.111455 0.001217  
H -3.068009 -0.839459 0.001815

H -2.853067 0.751982 0.000402  
 O -3.042802 2.683421 0.000321  
 H -3.473312 3.082337 0.769069  
 H -3.474128 3.084023 -0.767089  
 O -0.301633 1.881165 -0.003785  
 H 0.517313 2.410479 -0.001421  
 H -1.085725 2.457572 -0.001602  
 O 2.334650 2.983075 0.001151  
 H 2.612024 3.503356 0.768232  
 H 2.614427 3.498708 -0.768201  
 O 3.324734 0.191417 0.004994  
 H 4.285361 0.093979 0.007112  
 H 3.127874 1.144508 0.004784  
 O -4.237445 -2.086348 0.002648  
 H -4.476626 -2.615001 -0.768900  
 H -4.475314 -2.615686 0.774130

## <sup>2</sup>VIf

E= -4017.358016  
 O -3.148732 -0.231553 0.846621  
 Zn -1.528536 -0.055256 -0.564524  
 Zn 0.891007 -0.052055 0.136981  
 O 2.340160 1.423880 -0.303454  
 O 2.420941 -1.362635 -0.785385  
 O -5.785398 -0.209754 0.278784  
 O 2.464868 4.006474 0.469168  
 O 3.618042 -3.274470 0.713432  
 H -4.110441 -0.220338 0.622506  
 H -3.071814 -0.284878 1.807824  
 H 2.220722 -1.761820 -1.642664  
 H 2.837197 -2.074744 -0.242352  
 H 3.209283 1.125591 -0.600382  
 H 2.407444 2.363869 -0.011308  
 H 3.198956 -3.982875 1.217324  
 H 4.561749 -3.476508 0.698143  
 H 2.389812 4.759719 -0.129604  
 H 2.817941 4.353331 1.297651  
 H -6.313474 0.571969 0.075100  
 H -6.300542 -0.969523 -0.019280

## <sup>2</sup>VIg

E= -4017.356223  
 Zn 1.021868 -0.706172 -0.162374  
 Zn -1.290437 0.117551 0.378230  
 O -3.019063 -0.591126 -0.806477  
 O -5.034115 1.124313 -1.370077  
 O -2.557180 -0.829668 1.962328  
 O 3.292664 2.814177 0.549599  
 O 5.196781 -1.048649 -0.768606  
 O 2.867365 0.215911 -0.143049

H -2.833208 -1.065843 -1.627556  
 H -3.745844 0.044392 -1.015986  
 H -5.977921 0.926524 -1.330823  
 H -4.962000 2.046382 -1.645574  
 H -3.247475 -1.439935 1.667152  
 H -2.357514 -1.035976 2.885242  
 H 3.678877 3.091075 1.389816  
 H 3.508193 3.510755 -0.082938  
 H 5.712245 -1.615206 -0.181611  
 H 5.542817 -1.197221 -1.657103  
 H 3.056348 1.150699 0.101925  
 H 3.710959 -0.236681 -0.367940

## <sup>2</sup>VIh

E= -4017.354836  
 O 2.025185 0.306431 -0.244058  
 Zn 1.282577 -1.633500 0.200308  
 Zn -1.286722 -1.630322 0.199737  
 O -2.025426 0.313878 -0.232900  
 O 0.002295 2.220938 -0.655785  
 H 1.420261 1.062723 -0.396987  
 H 2.959474 0.598625 -0.350637  
 H -1.418766 1.067735 -0.390872  
 H -2.958870 0.606357 -0.345704  
 H 0.000884 2.602001 -1.543660  
 H 0.004441 2.993241 -0.042693  
 O 4.614471 1.096020 -0.537309  
 H 5.248975 1.150722 0.188313  
 H 5.136686 0.933243 -1.332940  
 O -4.613068 1.103887 -0.540275  
 H -5.247951 1.165084 0.184481  
 H -5.135225 0.938625 -1.335424  
 O 0.008518 4.349530 1.041213  
 H 0.780234 4.838367 1.352390  
 H -0.761603 4.832472 1.365276

## <sup>2</sup>VIi

E= -4017.354641  
 O -4.825114 -0.724684 0.647860  
 Zn -3.131888 0.673143 0.107104  
 Zn -0.859924 -0.402744 -0.208464  
 O 1.051067 -0.262887 -0.728336  
 O 2.730925 -2.236256 -0.481276  
 O 2.549579 1.958192 -0.617940  
 O 4.939132 -1.280057 0.787739  
 O 5.154031 1.633449 0.619498  
 H -5.737025 -0.427446 0.773448  
 H -4.825840 -1.686600 0.753505  
 H 1.584433 0.573225 -0.713777  
 H 1.687449 -1.040023 -0.675161

H 3.550890 -1.964253 -0.008961  
H 3.011252 -2.777449 -1.228666  
H 2.582139 2.598843 -1.338332  
H 3.454011 1.899579 -0.258527  
H 5.940682 1.862266 0.104898  
H 5.220951 2.159464 1.428624  
H 5.077322 -0.320617 0.862339  
H 5.411128 -1.691014 1.521042

#### VIIa

E= -4093.802415  
O 2.819433 0.000135 -0.000248  
O 4.402444 -0.058202 2.268422  
O 0.505936 -1.407268 -0.031318  
Zn -0.979264 0.000070 0.000330  
Zn -3.560321 -0.000091 -0.000333  
O 0.505871 1.407475 0.030592  
O 0.302693 -4.118836 -0.020122  
O 0.302975 4.119103 0.022144  
H 3.405054 0.018927 -0.786124  
H 3.405443 -0.018968 0.785305  
H 1.446967 1.115075 0.021047  
H 0.436433 2.387150 0.026725  
H 0.436409 -2.386933 -0.026193  
H 1.447058 -1.114937 -0.021518  
H 0.107500 -4.662856 0.752809  
H 0.101772 -4.665856 -0.789466  
H 0.107565 4.663193 -0.750685  
H 0.102072 4.665988 0.791587  
H 4.862036 -0.827802 2.625666  
H 4.773374 0.705577 2.726864  
O 4.401045 0.057762 -2.269608  
H 4.861307 0.827017 -2.626731  
H 4.771360 -0.706294 -2.728089

#### VIIb

E= -4093.801496  
O 0.065656 1.812108 -0.274720  
Zn -0.792668 -0.005611 -0.088752  
Zn -3.221508 -0.784207 0.343174  
O 0.923470 -1.113763 -0.416172  
O -1.415850 4.021957 0.286688  
O 3.592263 -0.327786 -0.575659  
O 2.611632 2.265868 -0.899130  
O 0.823913 -3.835524 -0.574904  
H 0.998386 2.028772 -0.538031  
H -0.427379 2.640002 -0.080388  
H 1.867982 -0.842692 -0.445610  
H 0.880105 -2.094745 -0.458668

H 0.691284 -4.447784 0.159425  
H 0.588679 -4.323942 -1.373680  
H -1.332576 4.563147 1.081543  
H -1.868927 4.572100 -0.364199  
H 4.145992 -0.389092 0.237944  
H 4.097249 -0.773094 -1.267862  
H 3.110460 1.424844 -0.907367  
H 2.919574 2.787979 -1.648925  
O 5.119142 -0.403774 1.672358  
H 5.627772 0.349459 1.997153  
H 5.364869 -1.153118 2.228341

#### VIIc

E= -4093.801447  
O -0.538966 0.289242 -1.383077  
Zn 0.957172 -0.029636 0.127272  
O -0.188786 1.330436 1.414846  
O -0.149590 -1.827264 0.697751  
O -2.894796 -1.576133 1.080107  
O -2.976808 1.169367 1.391340  
O -3.281496 1.583855 -1.262503  
O -2.934261 -1.148934 -1.688426  
H 0.211555 1.819695 2.144150  
H -1.164437 1.348546 1.529539  
H -0.986688 1.146131 -1.454162  
H -1.227593 -0.375129 -1.593163  
H -1.096111 -1.833285 0.961888  
H 0.298544 -2.531152 1.183536  
H -3.440607 -2.142030 1.640872  
H -3.060047 -0.648593 1.363664  
H -3.538218 1.673701 1.994071  
H -3.210133 1.460104 0.474615  
H -3.185667 -1.811779 -2.343751  
H -3.080041 -1.544941 -0.805598  
H -3.832212 2.208950 -1.750076  
H -3.451571 0.696912 -1.635765  
Zn 3.525524 0.095246 -0.250943

#### VIIId

E= -4093.799229  
O 2.760191 -0.449221 -0.152657  
O 0.253043 -1.479741 0.346839  
Zn -1.030412 0.057643 -0.189933  
O 0.615132 1.111346 -0.878112  
Zn -3.586432 0.437531 -0.208154  
O -0.328168 -3.912942 1.398821  
O 1.543319 3.223635 0.517191  
O 3.830757 1.700110 1.555149  
H 3.439590 -0.872807 -0.721625  
H 3.238038 0.124378 0.471879



H 1.222727 -1.343959 0.298642  
H 0.043028 -2.358933 0.734117  
H 0.833828 1.984781 -0.471158  
H 1.446983 0.590175 -0.809915  
H 1.604977 4.167643 0.329320  
H 2.398137 2.950391 0.891545  
H 3.792604 1.591158 2.515562  
H 4.740082 1.974966 1.372971  
H -0.594764 -4.685923 0.885975  
H -0.588925 -4.093572 2.310337  
O 4.697847 -1.578147 -1.737150  
H 5.122976 -2.432921 -1.594851  
H 4.829074 -1.370937 -2.670818

#### VIIe

E= -4093.798781  
O 2.420065 1.637798 1.005615  
O -0.274096 1.882621 0.122884  
Zn -1.020763 -0.067471 0.234988  
O 0.767265 -0.636692 1.044989  
Zn -3.277549 -1.197464 -0.312118  
O 2.066690 -2.790068 0.320969  
O 4.277400 -1.813932 -0.988867  
O 4.765349 1.099857 -0.570087  
H 2.685709 2.075035 1.824828  
H 3.237372 1.532389 0.478788  
H 0.657259 2.082303 0.328915  
H -0.748696 2.706090 -0.133985  
H 1.227178 -1.498271 0.825051  
H 1.453650 0.052892 1.138426  
H 2.295627 -3.523192 0.903942  
H 2.884697 -2.541593 -0.161494  
H 4.880424 1.661562 -1.349481  
H 5.610779 1.147840 -0.101359  
H 4.472989 -0.863099 -0.994695  
H 4.685007 -2.187349 -1.778991  
O -1.579278 4.146960 -0.583500  
H -2.131409 4.680792 0.001323  
H -1.808359 4.410297 -1.483401

#### VIIIf

E= -4093.798476  
O -0.919531 -1.130409 -0.283042  
Zn 0.792748 -0.116275 -0.024212  
O -0.073892 1.777093 -0.090405  
Zn 3.271043 -0.780557 0.302328  
O -3.339714 -0.138066 -0.260676  
O -5.529418 -0.803497 1.312473  
O -0.768907 -3.799028 -0.827736  
O 1.394233 4.045713 0.232776

O -2.670687 2.616929 -0.935236  
H -1.857838 -0.784839 -0.242924  
H -0.923348 -2.093003 -0.477319  
H -0.963303 2.046653 -0.393559  
H 0.471387 2.588464 0.019981  
H 1.640705 4.418993 1.088276  
H 2.014657 4.415701 -0.407595  
H -0.876774 -4.510906 -0.185026  
H -0.942991 -4.192594 -1.691720  
H -2.801681 2.787920 -1.878032  
H -3.031275 3.392132 -0.483672  
H -3.382819 0.819544 -0.401480  
H -4.086299 -0.384426 0.320916  
H -5.580493 -0.956516 2.263749  
H -6.330348 -1.192049 0.939679

#### VIIg

E= -4093.789231  
O 0.034452 0.000249 0.549738  
Zn -1.859373 0.000398 0.125527  
Zn -4.406356 0.000733 -0.289454  
O 1.639216 1.856725 -0.232806  
O 1.638327 -1.857402 -0.232503  
O 2.646075 4.042436 1.173864  
O 3.495788 -0.000459 -1.356051  
O 6.148487 0.000773 -0.620129  
H 0.612086 0.802251 0.318327  
H 0.611578 -0.802104 0.318513  
H 1.991030 2.604437 0.289872  
H 2.401490 1.378978 -0.612175  
H 2.401367 -1.380272 -0.611034  
H 1.988998 -2.605909 0.289814  
H 3.491395 -0.000939 -2.321510  
H 4.444991 -0.000107 -1.102721  
H 6.728876 0.771400 -0.597684  
H 6.729523 -0.769354 -0.597294  
H 2.751248 4.141539 2.127941  
H 2.559940 4.938447 0.825488  
O 2.642261 -4.045505 1.172887  
H 2.747380 -4.145809 2.126844  
H 2.555120 -4.941004 0.823444

#### <sup>2</sup>VIIa

E= -4093.797955  
Zn -0.377972 0.011721 -0.315509  
Zn -2.623900 0.065000 0.854419  
O -4.439146 -0.111230 -0.643606  
H -5.350414 -0.067146 -0.324002  
H -4.481704 -0.040893 -1.607247  
O 1.165475 1.407677 -0.426702

H 2.098269 1.123521 -0.507810  
H 1.108359 2.387801 -0.413127  
O 1.128860 -1.426579 -0.388806  
H 2.068305 -1.169347 -0.481998  
H 1.043379 -2.404732 -0.377741  
O 3.522263 -0.043346 -0.663252  
H 4.225713 -0.046050 0.025465  
H 3.986990 -0.058017 -1.509265  
O 1.029235 4.129105 -0.378470  
H 0.876424 4.667194 0.407941  
H 0.842338 4.699917 -1.133819  
O 0.915221 -4.142959 -0.345328  
H 0.751382 -4.675486 0.442669  
H 0.694800 -4.704811 -1.098376  
O 5.471349 -0.050883 1.245166  
H 5.936137 0.717023 1.599333  
H 5.910153 -0.824892 1.618676

## <sup>2</sup>VIIb

E= -4093.796783  
Zn 0.599650 0.000038 0.271758  
Zn -1.739800 0.000777 -0.661558  
O -3.382684 0.002452 0.785570  
H -4.341851 0.000989 0.559097  
H -3.309800 -0.001966 1.748159  
O 2.138132 -1.430740 0.036160  
H 3.078711 -1.188654 -0.021188  
H 2.056048 -2.409083 0.077153  
O 2.138181 1.430194 0.033249  
H 3.078795 1.187641 -0.021615  
H 2.056582 2.408535 0.075658  
O 4.615321 -0.000517 -0.142840  
H 5.126831 -0.000135 -0.963316  
H 5.271512 -0.000821 0.567195  
O 1.956859 -4.146371 0.119419  
H 1.735013 -4.709446 -0.632298  
H 1.845584 -4.693269 0.906656  
O 1.956961 4.145381 0.120291  
H 1.737892 4.709671 -0.631326  
H 1.846053 4.692005 0.907766  
O -6.039000 -0.002436 0.214703  
H -6.525620 0.769226 -0.100475  
H -6.521389 -0.772848 -0.109888

## <sup>2</sup>VIIc

E= -4093.796298  
O 2.279671 0.350565 -1.439952  
Zn 0.633346 0.598984 0.000283  
Zn -1.459907 -0.789440 0.000840  
O -3.433528 -0.127624 -0.001916

O 2.281703 0.357375 1.438457  
O -4.231066 2.490770 -0.000365  
O -5.603493 -1.794957 0.001059  
O 4.617344 0.633649 -0.002879  
H 3.204731 0.489557 -1.141130  
H 2.217523 0.609525 -2.367580  
H 3.206200 0.495197 1.137307  
H 2.220982 0.621164 2.364820  
H 5.277468 -0.099673 -0.001107  
H 5.133554 1.449696 -0.005706  
H -5.913875 -2.286175 0.771705  
H -5.916828 -2.284421 -0.769509  
H -3.748870 0.803714 -0.001282  
H -4.210392 -0.728940 -0.000853  
H -4.616549 2.926531 -0.770579  
H -4.618381 2.925639 0.769432  
O 6.460805 -1.353883 0.002300  
H 6.795694 -1.829145 -0.767942  
H 6.794083 -1.826136 0.775089

## <sup>2</sup>VIIId

E= are -4093.796028  
Zn 0.395797 -0.000162 0.180651  
Zn -1.677525 -0.000877 -1.246188  
O -3.663074 0.001034 -0.313178  
H -4.460182 0.000663 -0.857312  
H -3.946062 0.000666 0.630465  
O 1.952750 -1.431686 0.260480  
H 2.892485 -1.188137 0.324127  
H 1.873746 -2.408706 0.193732  
O 1.952561 1.431922 0.255597  
H 2.892217 1.188895 0.322382  
H 1.873053 2.409039 0.191298  
O 4.429710 0.000931 0.444891  
H 5.076064 0.000998 -0.274108  
H 4.952465 0.001021 1.258197  
O 1.783929 -4.143179 0.061153  
H 1.657374 -4.638510 -0.757352  
H 1.591254 -4.757949 0.779559  
O 1.782495 4.143983 0.061767  
H 1.657924 4.640103 -0.756568  
H 1.587785 4.757998 0.780267  
O -4.438372 0.000142 2.305334  
H -4.798235 -0.770799 2.761142  
H -4.798043 0.770706 2.761931

## <sup>2</sup>VIIe

E= -4093.795546  
O -3.419373 -0.259846 0.089975  
Zn -1.413796 -0.658867 -0.171154

Zn 0.528203 0.920192 -0.019963  
 O 2.537153 0.796005 -0.249987  
 O 4.118762 3.008441 -0.030555  
 O -5.395132 -2.117679 -0.158996  
 H -4.133998 -0.929252 0.000435  
 H -3.818524 0.616208 0.296302  
 H 3.054204 -0.032785 -0.444986  
 H 3.145611 1.563563 -0.176726  
 H -5.767239 -2.439338 -0.989254  
 H -5.664930 -2.749472 0.518707  
 H 4.461271 3.538586 -0.760445  
 H 4.591493 3.300413 0.758299  
 O -4.423648 2.203301 0.663667  
 H -4.881409 2.764531 0.025593  
 H -4.758108 2.460827 1.531699  
 O 3.804980 -1.451973 -0.780654  
 H 4.065927 -1.712833 -1.670622  
 H 4.368919 -1.959952 -0.160860  
 O 5.342048 -2.891169 1.002984  
 H 5.101335 -3.765773 1.332042  
 H 6.284917 -2.791086 1.181841

#### <sup>2</sup>VIII f

E= -4093.794678  
 O -2.215488 -2.034600 -0.627350  
 Zn -0.953272 -0.403768 0.221543  
 O -2.780271 0.682607 0.185344  
 Zn 1.246666 0.300967 -0.759736  
 O 3.126512 0.049968 0.119130  
 O -3.207717 3.264377 0.937191  
 O 5.476387 0.776844 -1.094784  
 O -4.901160 -1.182977 -0.442088  
 H -3.190104 -1.989676 -0.581531  
 H -1.957730 -2.964648 -0.605691  
 H -3.645711 0.264416 0.040740  
 H -2.917362 1.613284 0.470608  
 H -3.197908 3.613522 1.836790  
 H -3.109911 4.026081 0.352666  
 H -5.401920 -1.079229 -1.262932  
 H -5.543719 -1.486858 0.213415  
 H 5.822489 1.677846 -1.095754  
 H 5.823782 0.359481 -1.892770  
 H 3.338629 -0.427226 0.951574  
 H 3.965255 0.311092 -0.319694  
 O 3.652721 -1.290613 2.456671  
 H 4.133921 -2.126823 2.487782  
 H 3.870613 -0.832072 3.277639

#### <sup>2</sup>VII g

E= -4093.793875

O -4.278033 -0.583270 0.437860  
 Zn -2.535997 0.523608 -0.110995  
 Zn -0.291631 -0.616841 -0.206420  
 O 1.635470 -0.350735 -0.672321  
 O 3.462105 -2.189132 -0.305476  
 O 2.984640 1.983956 -0.648724  
 O -6.790186 0.360077 0.550068  
 O 5.612000 -1.024988 0.906168  
 O 5.606138 1.886083 0.607895  
 H -5.199474 -0.227247 0.476012  
 H -4.314983 -1.524566 0.650763  
 H 2.106033 0.519757 -0.689171  
 H 2.323312 -1.072936 -0.570037  
 H -7.200679 0.804306 1.302026  
 H -7.397781 0.462122 -0.192711  
 H 4.261399 -1.837804 0.148103  
 H 3.778847 -2.754584 -1.019437  
 H 2.976391 2.591523 -1.397764  
 H 3.891379 1.998066 -0.291976  
 H 6.381125 2.140868 0.088014  
 H 5.628211 2.456129 1.389049  
 H 5.664747 -0.054839 0.942022  
 H 6.073232 -1.359717 1.683795

#### <sup>2</sup>VIII h

E= -4093.793509  
 O 2.677185 1.284664 1.160106  
 Zn 1.130217 -0.206249 0.546566  
 Zn -1.019672 0.481342 -0.536395  
 O -2.950939 -0.077195 -0.004658  
 O 2.845708 -1.053057 -0.395054  
 O 3.153736 -3.592465 -1.296022  
 O 2.854946 3.627121 -0.203247  
 O -5.209671 0.692660 -1.346603  
 O -3.605018 -1.698795 2.100445  
 H 2.681435 1.528173 2.095280  
 H 2.737056 2.132846 0.658545  
 H 3.688326 -0.732987 -0.047094  
 H 2.969960 -1.981842 -0.700439  
 H 3.284178 -4.393947 -0.774636  
 H 3.407916 -3.814377 -2.200229  
 H -5.502194 0.332846 -2.192949  
 H -5.656674 1.542418 -1.249696  
 H -3.213037 -0.658548 0.743758  
 H -3.758155 0.204240 -0.487954  
 H -3.944961 -2.596496 1.999593  
 H -3.972940 -1.369127 2.929667  
 H 3.676307 4.064440 -0.459273  
 H 2.158842 4.026087 -0.739424

## **<sup>2</sup>VIIIi**

E= are -4093.791193  
O -1.993623 0.075271 0.242895  
Zn -1.286785 -1.906354 0.043888  
Zn 1.278821 -1.911114 -0.044280  
O 1.992807 0.067624 -0.243716  
O 0.003413 1.952583 0.000188  
H -1.367968 0.832047 0.145706  
H -2.919811 0.389881 0.146375  
H 1.369996 0.826759 -0.146404  
H 2.920253 0.378794 -0.148093  
H 0.100199 2.540956 0.778802  
H -0.090011 2.543138 -0.777147  
O -4.594991 0.906891 0.010680  
H -5.140713 0.778054 -0.775208  
H -5.205511 0.896498 0.758547  
O 4.597354 0.889168 -0.014051  
H 5.208075 0.874670 -0.761683  
H 5.142501 0.761909 0.772485  
O -0.282663 3.557587 -2.240107  
H -0.955349 4.233109 -2.389310  
H 0.336057 3.634901 -2.976496  
O 0.301223 3.548147 2.245650  
H -0.316150 3.625502 2.983155  
H 0.969193 4.229648 2.388706

## **VIIIa**

E= -4170.240039  
O -0.137097 -1.360401 -1.004249  
Zn -1.273038 0.105307 0.078964  
O 0.228979 1.566007 -0.474069  
O -0.260598 -0.586077 1.894368  
O 2.852372 0.948662 -0.089875  
O 4.879217 2.781394 0.121286  
O 2.424416 -0.932735 -2.036322  
O 2.458458 -1.106487 1.800428  
O 2.322397 -2.970146 -0.160743  
H -0.644882 -0.478666 2.772904  
H 0.703643 -0.755387 1.997100  
H 0.102820 -2.191297 -0.566925  
H 0.652167 -1.115425 -1.533155  
H 1.196887 1.473230 -0.293069  
H 0.009834 2.505643 -0.463461  
H 3.578900 1.604744 -0.006282  
H 2.900681 0.359884 0.689950  
H 2.989716 -1.308183 2.580844  
H 2.512643 -1.896351 1.208293  
H 2.703244 -0.793936 -2.949488

H 2.740598 -0.163437 -1.509799  
H 2.687495 -3.861003 -0.225530  
H 2.590367 -2.488212 -0.968456  
H 4.847168 3.643652 0.553501  
H 5.745808 2.729276 -0.300272  
Zn -3.842370 0.428484 -0.125389

## **VIIIb**

E= -4170.239210  
O -0.059455 -0.946172 -1.553791  
Zn 1.190204 0.053965 -0.074416  
O 0.127515 1.951299 -0.082166  
O -0.131280 -0.599778 1.484501  
O -2.624591 2.248761 -0.044103  
O -3.687703 0.691045 -1.908803  
O -2.503544 0.668000 2.198582  
O -2.673993 -1.838812 -1.242251  
O -2.868301 -1.997065 1.456397  
H 0.583263 2.728624 -0.428261  
H -0.841280 2.110795 -0.168359  
H 0.278952 -1.158350 -2.432189  
H -0.976704 -1.298410 -1.488132  
H -0.858673 -0.038616 1.831418  
H -0.464421 -1.507696 1.528707  
H -2.677255 1.099314 3.044575  
H -2.676869 1.335347 1.495162  
H -2.984920 3.144369 -0.064826  
H -3.090739 1.741927 -0.764031  
H -2.934796 -2.650356 -1.696184  
H -2.829505 -1.996617 -0.277895  
H -4.551377 0.735786 -2.334600  
H -3.476153 -0.254544 -1.776054  
H -3.422677 -2.602952 1.963279  
H -2.997501 -1.105744 1.839060  
Zn 3.786179 -0.110668 -0.016871

## **VIIIc**

E= -4170.235949  
O 0.336091 4.168631 -0.961103  
O -0.792151 1.691184 -0.652941  
Zn 0.364534 0.051645 0.093493  
O -0.869126 0.061598 1.817095  
O -0.876544 -1.381594 -0.928942  
O -0.740406 -1.692263 3.916242  
O 0.130162 -2.884212 -2.999146  
O -3.215692 1.146461 0.696598  
O -3.741431 -0.739500 -1.349668  
H -0.817098 -0.596787 2.543705  
H -1.798989 0.327223 1.696777  
H -1.644484 1.822668 -0.197429

H -0.369407 2.571929 -0.757245  
H 0.936168 4.608698 -0.346598  
H 0.435873 4.627068 -1.804435  
H -1.795204 -1.171895 -1.171219  
H -0.491655 -1.901122 -1.668287  
H 0.711833 -2.557219 -3.696744  
H 0.343565 -3.820303 -2.897775  
H -4.305560 -1.514605 -1.221367  
H -3.985550 -0.389261 -2.217621  
H -3.625868 0.539948 0.050755  
H -3.929060 1.666587 1.085963  
H -0.566389 -2.640884 3.882401  
H -0.431443 -1.397940 4.782219  
Zn 2.951667 -0.156196 0.094235

#### VIIIId

E= -4170.235888  
O -2.417671 1.081898 -0.250949  
O 0.187656 1.677454 0.419229  
Zn 1.264637 0.007927 -0.189129  
O -0.469094 -0.739511 -0.966176  
Zn 3.726621 -0.757501 -0.059286  
O -1.248634 -3.215974 -0.543338  
O -3.417033 -2.972480 1.124235  
O -4.365750 -0.204547 1.518190  
H -2.909016 1.577608 -0.941294  
H -3.088251 0.730187 0.361738  
H -0.784827 1.701237 0.297686  
H 0.511986 2.518661 0.809821  
H -0.732146 -1.698567 -0.873272  
H -1.269120 -0.191452 -0.810851  
H -1.419606 -3.863707 -1.236702  
H -2.030309 -3.223829 0.051437  
H -4.415935 0.144497 2.418790  
H -5.271940 -0.159751 1.182137  
H -3.742603 -2.091562 1.374260  
H -3.629336 -3.564258 1.855302  
O 1.092031 4.005619 1.501533  
H 1.530411 4.706811 1.003638  
H 1.375629 4.113427 2.417854  
O -3.852540 2.409295 -2.192988  
H -3.915620 2.094568 -3.103523  
H -4.018776 3.359327 -2.232455

#### VIIIe

E= -4170.235750  
O -0.006360 1.635829 0.243834  
Zn 1.139064 -0.000264 0.020906  
Zn 3.672789 -0.360020 -0.353246  
O -0.393479 -1.373268 0.183252

O -2.610226 1.669331 0.357668  
O 1.193312 4.028781 0.812911  
O 0.091812 -4.054346 -0.110473  
O -3.003826 -1.069308 1.032989  
H -1.008562 1.688399 0.256235  
H 0.378861 2.516199 0.441608  
H -1.322894 -1.260658 0.488839  
H -0.213682 -2.333652 0.084861  
H 0.252145 -4.470297 -0.966823  
H 0.556572 -4.598322 0.537746  
H 1.380232 4.731176 0.178030  
H 1.162818 4.455031 1.678359  
H -3.153710 -1.150536 1.983357  
H -3.683925 -1.640071 0.609198  
H -2.964321 0.777583 0.518842  
H -3.212936 2.117261 -0.267024  
O -4.422974 2.950724 -1.347100  
H -4.312972 3.146341 -2.285691  
H -4.994202 3.647831 -1.001286  
O -4.911142 -2.645241 -0.134940  
H -4.928645 -3.608865 -0.180831  
H -5.787301 -2.348889 -0.410339

#### VIIIIf

E= -4170.223745  
O 0.291665 0.000026 -0.782556  
Zn 2.134254 0.000143 -0.196810  
Zn 4.638627 0.000065 0.417160  
O -1.363951 1.846443 -0.124229  
O -1.364120 -1.846500 -0.124920  
O -2.329450 3.923720 -1.743452  
O -3.260778 0.000037 0.780950  
O -5.756509 0.001132 -0.485734  
H -0.304722 0.804063 -0.591675  
H -0.304701 -0.804099 -0.592042  
H -1.700176 2.549262 -0.713242  
H -2.138129 1.337089 0.198353  
H -2.138296 -1.337132 0.197628  
H -1.700337 -2.549400 -0.713823  
H -3.406875 -0.000515 1.747759  
H -4.150582 0.000310 0.374581  
H -6.337129 0.769935 -0.541436  
H -6.336995 -0.767591 -0.543873  
H -2.350015 3.956761 -2.707616  
H -2.274184 4.842238 -1.452269  
O -2.329362 -3.924819 -1.743313  
H -2.349686 -3.959462 -2.707427  
H -2.274192 -4.842865 -1.450618  
O -3.646184 -0.000570 3.550990  
H -3.676954 -0.770081 4.131961  
H -3.673943 0.769511 4.131360

**<sup>2</sup>VIIIa**

E= -4170.234175  
O -4.021315 0.001344 -0.595040  
O -6.137382 0.000100 1.136829  
O -1.661093 -1.416490 -0.172329  
Zn -0.142180 -0.000953 0.134863  
Zn 2.260267 0.002209 -0.617829  
O 3.769881 0.000729 0.983615  
O -1.660722 1.416886 -0.163550  
O -1.498728 4.148306 -0.214938  
O -1.504079 -4.148553 -0.214151  
H -4.411787 0.002724 -1.477797  
H -4.780549 0.000911 0.030279  
H -2.588601 -1.144590 -0.320137  
H -1.592811 -2.394944 -0.177086  
H -1.590575 2.395200 -0.172473  
H -2.587828 1.146003 -0.315491  
H -6.615666 -0.771064 1.464782  
H -6.612975 0.771186 1.468856  
H -1.386053 -4.716558 0.557019  
H -1.195764 -4.660773 -0.971802  
H 3.609446 -0.008020 1.935413  
H 4.745022 -0.001706 0.845829  
H -1.381253 4.717532 0.555421  
H -1.186450 4.657969 -0.972690  
O 6.474292 -0.005374 0.655164  
H 6.971263 -0.774178 0.349148  
H 6.975143 0.767029 0.364932

**<sup>2</sup>VIIIb**

E= -4170.233506  
O 3.154215 -0.016025 -0.030620  
O 4.895470 -0.069961 -2.191706  
O 0.821375 -1.410793 -0.162534  
Zn -0.686039 0.010630 -0.230890  
Zn -3.064717 0.040388 0.638799  
O -4.647000 -0.096117 -1.129516  
O 0.843891 1.409786 -0.219308  
O 0.687200 4.131158 0.062294  
O 0.624481 -4.127767 0.130409  
H 3.692942 -0.004905 0.787268  
H 3.784563 -0.034744 -0.779683  
H 1.759949 -1.122573 -0.097988  
H 0.747359 -2.382589 -0.056959  
H 0.784042 2.382838 -0.116766  
H 1.776747 1.107361 -0.137772  
H 5.296146 -0.849611 -2.594656  
H 5.285589 0.689397 -2.641087  
H 0.461203 -4.742789 -0.595196

H 0.321578 -4.574911 0.930260  
H -4.549805 -0.026753 -2.089145  
H -5.595177 -0.058288 -0.945860  
H 0.549633 4.747865 -0.667171  
H 0.389299 4.589889 0.857425  
O 4.596266 0.018328 2.341010  
H 5.025348 0.789084 2.732014  
H 4.986104 -0.748678 2.777802

**<sup>2</sup>VIIIc**

E= -4170.233413  
O 4.074293 -0.005138 0.501635  
Zn 2.033958 -0.011727 1.343325  
Zn 0.084300 0.002722 -0.246907  
O -1.439447 1.422423 -0.523965  
O -1.437797 -1.416300 -0.539941  
O -1.344281 -4.133984 -0.213392  
O -1.346385 4.139400 -0.193517  
O 4.985964 0.020134 -2.080987  
O -3.799514 0.004376 -0.949215  
H 4.843061 -0.010809 1.084847  
H 4.404376 0.004013 -0.425537  
H -2.366754 -1.141738 -0.673248  
H -1.390070 -2.388802 -0.421830  
H -2.367788 1.148359 -0.662600  
H -1.391685 2.394790 -0.404656  
H -4.563722 0.001278 -0.330099  
H -4.182596 0.007931 -1.835205  
H -1.187868 -4.584752 0.625499  
H -1.090517 -4.759725 -0.902906  
H -1.193861 4.588848 0.646798  
H -1.088203 4.765727 -0.880858  
H 5.361547 -0.747132 -2.530101  
H 5.367197 0.794040 -2.513643  
O -5.928618 -0.004532 0.767098  
H -6.407383 -0.777557 1.089963  
H -6.407198 0.764647 1.099283

**<sup>2</sup>VIIId**

E= -4170.232190  
O 4.033039 2.016520 0.127019  
O 1.211670 2.416299 -0.097620  
Zn 0.288744 0.550535 0.296263  
Zn -1.857120 -0.376277 -0.637908  
O -3.513394 -0.569945 0.802658  
O 2.223288 -0.222465 0.353061  
O 3.015832 -2.678633 0.932837  
O 0.050652 4.862820 -0.433649  
O 3.607871 -4.655340 -0.903456  
H 4.609975 2.096318 -0.644522

H 4.556195 2.341045 0.872267  
H 2.175665 2.540602 -0.051067  
H 0.776125 3.289763 -0.205939  
H 2.496926 -1.152260 0.569515  
H 3.010474 0.346909 0.331533  
H 3.205602 -3.387882 0.284758  
H 2.876508 -3.109848 1.782911  
H -0.360572 5.402773 0.252330  
H -0.289823 5.193042 -1.274133  
H 2.997983 -5.185752 -1.430061  
H 4.481612 -5.041973 -1.037503  
H -3.453733 -0.478858 1.761828  
H -4.397082 -0.952511 0.596318  
O -5.978765 -1.609886 0.285098  
H -6.702560 -1.086789 -0.081273  
H -6.133540 -2.517311 -0.005209

## <sup>2</sup>VIIIe

E= -4170.231973  
O 0.870401 0.886024 -1.195399  
Zn -0.659589 0.014368 0.078185  
Zn -3.143054 -0.565566 -0.049224  
O 0.545458 -1.869441 -0.024093  
O 0.495968 0.821790 1.790457  
O 3.246450 0.304617 1.881707  
O 3.349442 -1.793287 0.095001  
O 3.644866 -0.130141 -2.015170  
O 3.306274 2.035105 -0.309163  
H 0.125967 -2.732669 0.073727  
H 1.515576 -1.992126 0.045639  
H 1.325352 0.324691 -1.841811  
H 1.566394 1.472905 -0.836537  
H 1.432898 0.599649 1.980792  
H 0.041149 0.918172 2.636799  
H 3.789232 0.274508 2.679605  
H 3.406436 -0.536524 1.396191  
H 3.907128 -2.580302 0.137922  
H 3.582068 -1.323294 -0.743776  
H 3.576849 2.960155 -0.258312  
H 3.435014 1.646932 0.580571  
H 4.202691 -0.185203 -2.800719  
H 3.801239 0.746062 -1.610225  
O -4.456692 1.419627 -0.353789  
H -4.235767 2.247054 -0.803546  
H -5.410276 1.301588 -0.461541

## <sup>2</sup>VIII f

E= -4170.230845  
O -2.901363 0.864339 -0.328080  
Zn -0.867584 0.900751 -0.279297

Zn 0.867693 -0.903271 -0.279599  
O 2.901486 -0.863985 -0.327543  
O 4.452788 -3.117704 -0.458294  
O -4.449119 3.120434 -0.459320  
H -3.465732 1.665969 -0.372044  
H -3.473797 0.050255 -0.301502  
H 3.472830 -0.049134 -0.301032  
H 3.466926 -1.664865 -0.371468  
H -4.650236 3.714366 0.274015  
H -4.667611 3.605429 -1.264391  
H 4.653384 -3.711506 0.275292  
H 4.670525 -3.603413 -1.263139  
O -4.325243 -1.359578 -0.266429  
H -4.916782 -1.630351 0.465851  
H -4.674507 -1.767428 -1.066487  
O 4.322455 1.361825 -0.265974  
H 4.914532 1.632562 0.465873  
H 4.670801 1.770161 -1.066179  
O 5.942949 2.136567 1.835927  
H 6.851237 1.864939 2.015095  
H 5.794873 2.931385 2.362570  
O -5.944138 -2.134460 1.836614  
H -6.852281 -1.862722 2.016374  
H -5.795953 -2.929544 2.362832

## <sup>2</sup>VIIIg

E= -4170.230630  
O -2.229342 -0.043465 -0.074069  
Zn -0.274612 -0.481124 -0.177335  
Zn 1.925240 0.631019 0.270341  
O 3.805806 -0.194288 0.012840  
O -3.112130 2.308290 0.767658  
O 4.281609 -2.710586 -0.928461  
O 6.142554 1.109377 0.556807  
O -4.076842 -1.821253 -0.747276  
O -4.097687 4.340429 -0.832677  
H -2.954875 -0.678139 -0.308816  
H -2.608396 0.823121 0.229107  
H 4.011233 -1.095803 -0.323249  
H 4.645828 0.276897 0.207967  
H -4.515377 -1.843360 -1.604599  
H -4.602476 -2.388383 -0.147016  
H 6.543507 1.785514 -0.003076  
H 6.504484 1.246196 1.440949  
H -3.481722 3.020604 0.206892  
H -3.450821 2.455045 1.657527  
H 4.603305 -2.899662 -1.818599  
H 4.582169 -3.443341 -0.376825  
H -4.985853 4.442805 -1.195127  
H -3.661314 5.192336 -0.954047  
O -5.515475 -3.453700 0.963915

H -6.353332 -3.263197 1.402614  
H -5.383159 -4.405894 1.046210

### **<sup>2</sup>VIIIh**

E= -4170.230354  
O 4.012213 0.053735 -0.229836  
Zn 2.102002 0.761096 0.110588  
Zn 0.002479 -0.601144 0.255646  
O -1.947979 -0.301048 0.671104  
O -3.788134 -2.172361 0.463751  
O 6.239503 1.624641 -0.312816  
O 4.631731 -2.579426 -0.548224  
O -3.316946 2.030758 0.466403  
O -5.966319 1.818345 -0.729800  
H 4.815633 0.619244 -0.259333  
H 4.273207 -0.887859 -0.347293  
H -2.420383 0.564731 0.618214  
H -2.632151 -1.028324 0.628195  
H 6.526868 2.147044 -1.071629  
H 6.694732 1.993515 0.453991  
H -4.597610 -1.855392 0.004301  
H -4.088960 -2.684068 1.223526  
H 4.854703 -2.985455 -1.394952  
H 5.049469 -3.127517 0.127515  
H -3.294312 2.699200 1.161203  
H -4.232296 2.010072 0.134069  
H -6.736293 2.112513 -0.223627  
H -5.997597 2.324076 -1.553640  
O -5.976782 -1.106985 -0.785974  
H -6.021172 -0.142553 -0.901155  
H -6.426586 -1.499043 -1.543263

### **<sup>2</sup>VIIIi**

E= -4170.228741  
O -2.457023 1.381155 -0.604492  
Zn -0.889400 0.011278 -0.012668  
O -1.849235 0.094082 1.983414  
Zn 1.589548 -0.027778 0.441708  
O 2.964818 -0.128575 -1.243058  
O -2.463539 -1.470533 -0.290740  
O 0.212412 0.207372 3.700649  
O -2.120763 3.761652 -1.877829  
H -1.177529 0.107975 2.710785  
H -2.406985 0.873747 2.105558  
H -2.802226 -1.710075 0.583403  
H -2.365879 -2.304905 -0.804685  
H -3.187762 0.914063 -1.031866  
H -2.318677 2.222845 -1.096950  
H -2.520958 4.584340 -1.570303  
H -1.767096 3.946904 -2.756203

H 1.013085 0.121886 3.152185  
H 0.404415 -0.235291 4.536744  
H 2.740098 -0.067150 -2.179659  
H 3.946704 -0.083400 -1.168720  
O -2.255125 -3.749908 -1.770454  
H -2.984504 -4.113449 -2.287706  
H -1.617922 -4.467201 -1.666768  
O 5.674441 -0.005842 -1.108725  
H 6.160565 0.761429 -0.781913  
H 6.232331 -0.771936 -0.925235

### **Xa**

E= -4323.114580  
O 1.784812 1.645241 2.171535  
O 1.716684 3.409546 0.082812  
O -0.010959 -0.347294 1.372758  
Zn -1.470857 -0.060160 -0.141366  
O -0.418449 -1.350707 -1.588865  
O -0.389190 1.596256 -1.017676  
O 1.691043 -2.545532 1.625986  
O 2.008347 -2.659555 -1.150246  
O 3.782935 -0.570182 -1.108232  
O 3.635621 -0.410595 1.498393  
O 2.283978 1.594611 -1.956864  
H 0.469711 1.421336 -1.455219  
H -0.256645 2.433349 -0.546444  
H -0.954043 -1.814667 -2.244463  
H 0.407117 -1.870549 -1.462880  
H 2.257161 -3.419461 -1.691688  
H 2.724379 -1.987404 -1.263697  
H 0.474561 -1.182221 1.537864  
H 0.555114 0.386675 1.694737  
H 4.703777 -0.646423 -1.389724  
H 3.803614 -0.468820 -0.105751  
H 1.805833 -2.858458 0.705467  
H 1.583529 -3.326702 2.182718  
H 3.137682 0.359941 1.833270  
H 3.128257 -1.188599 1.790352  
H 1.802956 2.386374 1.521608  
H 1.735211 2.047453 3.047755  
H 2.135481 2.964490 -0.682003  
H 2.021381 4.325202 0.077501  
H 2.876856 0.837948 -1.737851  
H 2.443705 1.804584 -2.885459  
Zn -4.046950 -0.043119 0.195935

### **Xb**

E= -4323.113466  
O 0.322590 -1.382811 -1.037407



Zn 1.587390 0.071037 -0.062460  
 O 0.427396 1.837426 -0.499608  
 O 0.472069 -0.157221 1.747486  
 O -2.254708 2.091424 -0.246364  
 O -3.412319 0.027687 -1.514055  
 O -2.181063 -2.154414 -0.330398  
 O -1.875668 1.227522 2.283757  
 O -2.819452 -4.767409 -0.970012  
 O -3.286164 4.576610 -0.905442  
 O -2.096505 -1.547986 2.363169  
 H 0.808755 2.522598 -1.060990  
 H -0.558208 1.956390 -0.497725  
 H 0.536452 -1.706658 -1.920375  
 H -0.596320 -1.683921 -0.815003  
 H -0.226004 0.493225 1.981163  
 H 0.100420 -1.014104 2.007905  
 H -2.005034 1.890033 2.972859  
 H -2.128858 1.649142 1.423628  
 H -2.646951 2.957595 -0.483693  
 H -2.758296 1.398490 -0.744846  
 H -2.415843 -3.082017 -0.543974  
 H -2.252012 -2.059711 0.644855  
 H -4.344657 -0.086485 -1.728922  
 H -3.096742 -0.825743 -1.145910  
 H -2.534683 -2.009516 3.088067  
 H -2.267937 -0.592563 2.490320  
 H -3.245099 4.985618 -1.778602  
 H -3.913741 5.105589 -0.397986  
 H -2.246291 -5.539421 -0.888419  
 H -3.645851 -5.091618 -1.348213  
 Zn 4.181527 0.019845 -0.216978

### Xc

E= -4323.113197  
 O 0.600714 0.519070 1.910973  
 Zn 1.612795 -0.061125 0.067688  
 O 0.177178 0.988208 -1.090562  
 O 0.523424 -1.886111 -0.304138  
 O -2.166018 -2.180831 -0.242363  
 O -3.098315 -1.228874 2.103955  
 O -2.260543 -0.054194 -1.935595  
 O -2.017115 1.365516 2.152093  
 O -2.237797 2.303566 -0.342642  
 O -3.285703 4.753808 -1.033257  
 O -3.052414 -4.729170 -0.879628  
 H 0.976539 -2.729732 -0.189078  
 H -0.452141 -2.052117 -0.220570  
 H 1.061370 0.494263 2.757996  
 H -0.323021 0.823236 2.074151  
 H -0.504726 0.480919 -1.579896  
 H -0.328960 1.735125 -0.721347

H -2.583590 -0.234180 -2.826326  
 H -2.360398 -0.890928 -1.419557  
 H -2.506255 -3.074596 -0.455960  
 H -2.577092 -1.914260 0.616633  
 H -2.235760 2.015750 2.831125  
 H -2.194017 1.801117 1.276238  
 H -3.974501 -1.335305 2.490926  
 H -2.841939 -0.294134 2.233899  
 H -2.639029 3.158115 -0.608231  
 H -2.560966 1.621033 -0.959894  
 H -2.805559 5.436815 -1.517268  
 H -4.190900 5.076510 -0.947248  
 H -2.894578 -5.524931 -0.356932  
 H -3.710262 -4.976597 -1.540797  
 Zn 4.193155 0.113658 -0.189306

### Xd

E= -4323.113085  
 O -0.521185 0.833692 -1.367973  
 Zn -1.684079 -0.155350 0.116254  
 O -0.558484 -1.964329 -0.296847  
 O -0.348881 0.626037 1.624803  
 O 2.290228 0.251547 1.253616  
 O 2.127206 -1.811733 -0.589442  
 O 1.896354 2.005260 -0.880974  
 O 2.080286 -0.043701 -2.686881  
 O 2.420545 4.715573 -0.799391  
 O 3.636075 -4.130151 -0.705196  
 O 4.219974 0.245330 3.244424  
 H -0.888020 -2.834748 -0.044341  
 H 0.429199 -2.015383 -0.377390  
 H -0.209366 0.309878 -2.121495  
 H 0.252576 1.395284 -1.119578  
 H 0.630678 0.464229 1.613179  
 H -0.638862 0.637711 2.544695  
 H 2.968532 0.239044 1.959823  
 H 2.397296 -0.568687 0.723741  
 H 2.679840 -2.618667 -0.647605  
 H 2.242387 -1.318496 -1.432796  
 H 2.093629 2.964944 -0.853159  
 H 2.201141 1.608526 -0.039866  
 H 2.555736 -0.008982 -3.524878  
 H 2.234053 0.811130 -2.229782  
 H 4.528778 -4.260620 -0.363111  
 H 3.444476 -4.908039 -1.243174  
 H 1.731112 5.374009 -0.648171  
 H 3.112023 5.170211 -1.295919  
 H 4.131730 -0.108295 4.137940  
 H 4.976401 0.843926 3.273193  
 Zn -4.276264 -0.077888 0.261065

## Xe

E= -4323.112317

O 3.795385 -2.447251 -1.821390  
O 1.500581 -1.895377 -0.412930  
Zn 0.839227 0.097424 -0.051669  
O -0.741880 -0.210881 -1.469885  
O -0.404641 -0.466059 1.575873  
O 0.617338 -0.679352 4.129771  
O -0.964265 -2.978420 -1.227600  
O -2.380227 -2.422236 1.038371  
O -4.342263 -0.903426 0.043666  
O -3.196420 1.192593 -1.425127  
O -3.058800 3.739003 -0.440866  
H -1.573612 0.306217 -1.453589  
H -0.974633 -1.151973 -1.600527  
H 0.808906 -2.494253 -0.755397  
H 2.323366 -2.065521 -0.920262  
H 4.147362 -1.963421 -2.578519  
H 4.536323 -2.948184 -1.458818  
H -3.757169 4.227469 0.011707  
H -2.373726 4.385791 -0.650032  
H -1.071505 -1.177719 1.485567  
H -0.020664 -0.532053 2.475769  
H -3.557427 1.293144 -2.315409  
H -3.149796 2.105988 -1.060251  
H 1.454068 -1.103865 4.356123  
H 0.454696 -0.030556 4.825629  
H -3.179887 -1.904105 0.762840  
H -2.667656 -3.029165 1.731076  
H -5.252191 -0.760480 0.326044  
H -4.053029 -0.093478 -0.423792  
H -1.539014 -3.008883 -0.429672  
H -1.233140 -3.704326 -1.802746  
Zn 2.296782 2.243264 0.036841

## Xf

E= -4323.110633

O 2.614600 -3.344855 -2.012059  
O 0.650997 -1.848004 -0.802826  
Zn 1.054556 0.094620 -0.042127  
O -0.660685 0.158768 1.207028  
O -0.077711 0.933232 -1.684606  
O -0.443917 -0.671918 3.843268  
O -1.724273 -1.244346 -2.130605  
O -3.103852 -0.477238 0.041087  
O -3.899429 2.009466 -0.765006  
O -4.975193 -1.995773 1.413439  
O -1.443383 3.463839 -1.234843  
H -0.533182 1.785671 -1.559748

H -0.731259 0.298495 -2.047582  
H -0.144037 -1.901566 -1.369898  
H 1.364857 -2.365875 -1.233213  
H 3.315051 -3.026464 -2.594467  
H 2.905024 -4.208768 -1.694924  
H -1.544181 -0.126458 0.879880  
H -0.575313 -0.138165 2.137110  
H -1.380147 4.077913 -1.979448  
H -1.065920 3.938450 -0.481359  
H 0.054140 -1.458102 4.099927  
H -0.338622 -0.047903 4.572346  
H -3.518926 0.390214 -0.164343  
H -3.768653 -1.007783 0.525983  
H -4.701825 2.526754 -0.633511  
H -3.173550 2.643142 -0.899621  
H -2.381461 -1.093163 -1.405853  
H -2.203691 -1.593468 -2.890607  
H -5.063567 -2.073129 2.370990  
H -5.664353 -2.557079 1.038171  
Zn 3.400524 0.907778 0.719832

## XIIa

E= -4475.987397

O 0.099646 3.390181 2.176421  
O 1.921137 1.502214 1.502016  
O 0.216026 -0.536049 0.881588  
Zn -1.493217 -0.415514 -0.339215  
O -0.474162 1.006121 -1.558921  
O -0.618613 -2.050024 -1.534960  
O 1.337880 -2.698701 2.222906  
O 1.586340 -3.450410 -0.485838  
O 3.509266 -1.497654 -0.797442  
O 3.508320 -0.819096 1.734740  
O 2.286870 0.506326 -2.266159  
O 2.682700 2.861633 -0.912890  
O 0.026478 3.661559 -0.704795  
H -0.028061 4.119651 2.793348  
H -0.120810 3.722472 1.288489  
H 0.428904 0.753515 -1.835847  
H -0.427403 1.944707 -1.278990  
H -1.211853 -2.637932 -2.019112  
H 0.106554 -2.603889 -1.168869  
H 1.819337 -4.316553 -0.843469  
H 2.345042 -2.852334 -0.689827  
H 0.422588 -1.245462 1.520512  
H 0.789697 0.240799 1.090820  
H 4.416292 -1.716803 -1.047052  
H 3.556565 -1.204187 0.167791  
H 1.396411 -3.234213 1.406773  
H 1.079645 -3.293367 2.937638

H 3.080570 0.046508 1.884842  
H 2.937342 -1.467972 2.181814  
H 2.306289 1.991200 0.750574  
H 1.375733 2.174446 1.970295  
H 2.701394 2.096406 -1.530009  
H 3.503369 3.352150 -1.043826  
H 0.993411 3.626944 -0.863608  
H -0.314422 4.390919 -1.237949  
H 2.733025 -0.238280 -1.794603  
H 2.417415 0.345589 -3.209176  
Zn -4.005521 -0.217923 0.289752

### XVIa

E= -4781.730926  
O -1.852148 1.281599 -2.941764  
O 0.664613 0.642518 -2.724148  
Zn 1.612316 -0.320623 -1.096950  
O 2.457557 1.522951 -0.545606  
O -0.056612 -0.006287 0.367107  
O 0.610413 -1.264564 2.533651  
O 3.568059 1.785569 1.897721  
O -1.467765 -2.789160 3.435689  
O -0.151081 2.379823 1.756644  
O -2.789841 2.666165 1.278617  
O 1.483322 1.248790 3.715039  
O -2.041014 3.613830 -1.243966  
O 0.696265 3.858686 -0.466210  
O -2.929861 -0.026012 0.427970  
O -3.779787 -0.625651 -2.067520  
O -3.598016 -2.449970 1.596946  
O -3.608294 -3.238752 -0.974329  
H 0.851063 1.806087 3.212265  
H 1.479321 1.573492 4.623611  
H 3.005449 1.527784 2.655117  
H 4.471482 1.529825 2.115657  
H -3.276639 -3.996438 -1.468422  
H -3.617973 -2.472437 -1.580454  
H -0.315003 0.839233 -2.818341  
H 1.014476 0.485122 -3.609166  
H -0.076678 -1.835486 2.945962  
H 0.887655 -0.604400 3.191147  
H -3.067385 0.837480 0.863839  
H -3.228378 -0.738090 1.033815  
H -1.861010 2.638704 1.627792  
H -3.324152 3.128596 1.935894  
H -2.455597 3.399445 -0.379007  
H -2.545752 4.350534 -1.611136  
H -0.182394 3.884711 -0.898431  
H 1.100559 4.722152 -0.616233  
H -4.699618 -0.426271 -2.283280

H -3.631266 -0.326256 -1.137934  
H -2.553555 0.625529 -2.763916  
H -2.047304 2.067608 -2.400639  
H -4.466272 -2.646412 1.970248  
H -3.587743 -2.875221 0.703312  
H -1.359563 -3.693252 3.752433  
H -2.213802 -2.803033 2.804683  
H 0.167005 -0.565449 1.182092  
H -1.009453 -0.153807 0.194487  
H 1.923804 2.326676 -0.684142  
H 2.913354 1.614702 0.327512  
H -0.064971 1.550601 1.224416  
H 0.268770 3.060146 1.192152  
Zn 2.849520 -2.600316 -1.025453

### XVIIa

E= -4858.167744  
O -1.075236 1.890903 -3.039846  
O 0.713934 0.012904 -2.753120  
Zn 1.333484 -1.068422 -1.047562  
O 0.129261 0.086847 0.422906  
O 2.952646 0.265745 -0.825990  
O 0.423133 -0.961557 2.785396  
O 4.380572 0.312596 1.461169  
O -1.915185 -0.814994 4.196326  
O 1.222277 2.423533 1.417941  
O -1.091854 3.742069 0.979479  
O 2.486918 0.977532 3.429680  
O 2.460647 3.163946 -0.969364  
O -0.106676 4.192435 -1.599965  
O -3.908791 -0.221986 2.296521  
O -4.544174 -2.205771 0.679654  
O -4.050794 -1.622609 -1.930329  
O -2.466507 1.276401 0.488083  
O -3.586520 1.167979 -1.972907  
H 2.071917 1.675873 2.877736  
H 2.705795 1.383486 4.277117  
H 3.855122 0.434477 2.277154  
H 5.099091 -0.293542 1.674236  
H -4.338744 -3.131085 0.853454  
H -4.397020 -2.058774 -0.284873  
H 0.001470 0.713419 -2.848832  
H -4.559019 -1.971911 -2.671207  
H -3.939824 -0.664826 -2.094189  
H 0.835930 -0.394857 -3.618457  
H -0.376127 -0.964700 3.359356  
H 1.099329 -0.433835 3.244722  
H -2.170308 2.154407 0.796663  
H -2.991246 0.856830 1.209132  
H -0.236917 3.356802 1.305024

H -1.346264 4.426585 1.610642  
H -0.540231 4.204805 -0.717700  
H -0.264177 5.059502 -1.994147  
H 1.671159 3.591891 -1.361375  
H 3.215958 3.719972 -1.197077  
H -4.367199 1.725720 -2.076647  
H -3.288210 1.268714 -1.034958  
H -1.996544 1.696569 -2.778648  
H -0.830021 2.730303 -2.611235  
H -4.744221 0.108446 2.649458  
H -4.151336 -1.003437 1.721797  
H -2.192302 -1.464449 4.852612  
H -2.682909 -0.669897 3.606994  
H 0.177561 -0.380613 1.319868  
H -0.811181 0.334801 0.296544  
H 2.822970 1.200836 -1.065584  
H 3.514236 0.244853 -0.012038  
H 0.891793 1.582944 1.016034  
H 1.835803 2.780218 0.742595  
Zn 1.474398 -3.641821 -0.747413

### XVIIIa

E= -4934.602492  
O 0.417950 -1.127054 3.665935  
O -1.512415 0.312728 2.693518  
Zn -1.938135 0.501491 0.630849  
O -1.525180 2.534398 0.862928  
O 0.195489 0.093399 -0.138148  
O 0.183382 -0.023458 -2.799231  
O -1.635671 4.179802 -1.248617  
O 2.838963 -0.438095 -3.095490  
O 1.734642 2.362991 -0.570044  
O 4.148866 1.246759 -1.025926  
O 4.219299 -0.224509 1.250030  
O 2.519188 0.853542 3.189869  
O 1.089900 3.071817 2.061933  
O 0.243723 2.949619 -2.897875  
O 0.594110 -3.442356 2.055392  
O 2.121524 -1.956700 0.415963  
O 2.435321 -3.033165 -2.059638  
O -0.153261 -2.921132 -2.454446  
O -1.411033 -3.460293 -0.018422  
H 0.891700 2.895889 -2.163426  
H 0.681542 3.423760 -3.615702  
H -1.115423 3.833318 -2.001752  
H -2.442293 4.565552 -1.608526  
H -0.384340 -2.021257 -2.736300  
H -0.667274 -3.108721 -1.640812  
H -0.806857 -0.287094 3.084608  
H -2.082463 -4.150208 0.038122

H -0.835053 -3.571740 0.762477  
H -2.257728 0.325474 3.305918  
H 1.151571 -0.120691 -2.996465  
H -0.054270 0.858950 -3.129060  
H 2.924861 -1.485355 0.710082  
H 2.344127 -2.393838 -0.442113  
H 4.336382 0.333201 0.440032  
H 5.095908 -0.556373 1.480772  
H 3.201102 0.533552 2.557878  
H 2.989031 1.028645 4.015424  
H 1.537812 2.345959 2.546225  
H 1.180796 3.858985 2.612950  
H 0.953429 -4.275301 2.384637  
H 1.281295 -3.043368 1.468451  
H 0.529478 -1.992317 3.223876  
H 1.230571 -0.611044 3.522879  
H 2.830277 -3.870203 -2.330259  
H 1.455608 -3.085884 -2.275339  
H 3.329133 1.786617 -0.884283  
H 4.836520 1.852680 -1.328494  
H 3.413423 0.046706 -2.479990  
H 2.917594 -1.381000 -2.853603  
H 0.111481 -0.019046 -1.129291  
H 0.754583 -0.661464 0.150252  
H -0.729851 2.763943 1.378308  
H -1.603052 3.168917 0.106393  
H 1.200358 1.557411 -0.368783  
H 1.632570 2.897294 0.242168  
Zn -3.790896 -0.810435 -0.602486

### XIXa

E= -5011.039917  
O 1.020000 -3.904263 -0.310018  
O 2.430777 -1.971410 -1.328781  
Zn 2.169419 0.033916 -0.725801  
O 0.014523 -0.172967 -0.068770  
O 1.504100 0.504999 -2.652181  
O -0.725240 2.099624 1.106053  
O 0.399440 2.956854 -2.900565  
O -3.463309 1.560058 1.166443  
O -3.473077 4.064100 -0.086472  
O -0.825973 4.261090 -0.677795  
O -2.723516 -0.096633 3.304094  
O -0.341665 0.905462 3.685717  
O -1.614438 -1.929697 1.565755  
O 0.430434 -3.445220 2.424261  
O 1.633334 -1.037763 3.415175  
O -3.429649 -2.789218 -0.433276  
O -4.190266 -0.244598 -0.937042  
O -1.924201 0.237886 -2.109696

O -0.378370 -1.463010 -3.721830  
O -1.283365 -3.632591 -2.044068  
H -1.804512 4.317806 -0.550123  
H -0.477092 5.129495 -0.442316  
H -0.073773 3.435696 -2.191346  
H 0.740944 3.626078 -3.503649  
H -0.219285 1.502567 2.927356  
H 0.389407 0.252524 3.643150  
H 1.927470 -2.727889 -0.898159  
H 2.358410 -1.129794 4.043715  
H 1.364273 -1.942937 3.166488  
H 3.334819 -2.274324 -1.476784  
H -1.700573 1.974051 1.094787  
H -0.573027 2.905251 0.570084  
H -2.293663 -2.293025 0.963493  
H -2.091108 -1.360608 2.214100  
H -3.851726 -1.919259 -0.654165  
H -4.151075 -3.396547 -0.227773  
H -2.097909 -3.362470 -1.565158  
H -1.504226 -4.462077 -2.486493  
H -0.590684 -2.278269 -3.223294  
H -0.299969 -1.722815 -4.647636  
H 0.238501 -4.171755 3.029602

H -0.426891 -2.989891 2.238576  
H 0.830637 -3.866027 0.648488  
H 0.167821 -3.915344 -0.781517  
H -3.193846 -0.281869 4.125543  
H -1.831539 0.295401 3.562044  
H -3.384562 -0.023315 -1.496267  
H -4.966310 0.031709 -1.439940  
H -3.791056 0.931299 0.492431  
H -3.432679 1.059896 2.008063  
H -0.190142 0.685545 0.397061  
H -0.368423 -0.865426 0.509357  
H 0.941890 -0.170075 -3.077023  
H 1.085798 1.390945 -2.786831  
H -1.219367 0.116464 -1.441256  
H -1.591979 -0.230490 -2.895562  
H -3.647884 3.299143 0.496064  
H -4.132491 4.734115 0.124546  
Zn 3.698898 1.381904 0.870945

## Infrared Multiple Photon Dissociation Spectra of $\text{Zn}_2^+(\text{H}_2\text{O})_n$ ( $n = 1-20$ )

The following IRMPD spectra are given in ASCII format, presented in wavenumber ( $\text{cm}^{-1}$ ) and calculated single-photon cross sections ( $10^{-21} \text{ cm}^2$ ) for cluster sizes  $n = 1-8, 10, 16$  and  $20$ .

### $\text{Zn}_2^+(\text{H}_2\text{O})$

| Wavenumber / $\text{cm}^{-1}$ | Calculated Cross Section / $10^{-21} \text{ cm}^2$ |
|-------------------------------|----------------------------------------------------|
| 2240.143                      | 0.00                                               |
| 2289.902                      | 0.00                                               |
| 2339.729                      | 0.00                                               |
| 2390.057                      | 0.01                                               |
| 2440.215                      | 0.00                                               |
| 2490.04                       | 0.00                                               |
| 2540.005                      | 0.00                                               |
| 2590.003                      | 0.00                                               |
| 2639.916                      | 0.00                                               |
| 2690.342                      | 0.00                                               |
| 2739.726                      | 0.00                                               |
| 2790.179                      | 0.00                                               |
| 2800.336                      | 0.00                                               |
| 2809.778                      | 0.00                                               |
| 2820.079                      | 0.00                                               |
| 2829.655                      | 0.00                                               |
| 2840.102                      | 0.00                                               |
| 2849.815                      | 0.00                                               |
| 2859.594                      | 0.00                                               |
| 2870.264                      | 0.00                                               |
| 2880.184                      | 0.00                                               |
| 2890.173                      | 0.00                                               |
| 2900.232                      | 0.00                                               |
| 2910.361                      | 0.00                                               |
| 2919.708                      | 0.00                                               |
| 2929.974                      | 0.00                                               |
| 2940.312                      | 0.00                                               |
| 2949.853                      | 0.00                                               |
| 2960.332                      | 0.00                                               |
| 2970.003                      | 0.00                                               |
| 2979.738                      | 0.00                                               |
| 2990.431                      | 0.00                                               |
| 3000.3                        | 0.00                                               |
| 3010.235                      | 0.00                                               |
| 3020.236                      | 0.00                                               |

|          |      |
|----------|------|
| 3030.303 | 0.00 |
| 3040.438 | 0.00 |
| 3049.71  | 0.00 |
| 3059.976 | 0.00 |
| 3070.31  | 0.00 |
| 3079.766 | 0.00 |
| 3090.235 | 0.00 |
| 3099.814 | 0.00 |
| 3110.42  | 0.00 |
| 3120.125 | 0.00 |
| 3129.89  | 0.00 |
| 3139.717 | 0.00 |
| 3149.606 | 0.00 |
| 3159.558 | 0.00 |
| 3169.572 | 0.00 |
| 3179.65  | 0.00 |
| 3189.793 | 0.00 |
| 3200     | 0.00 |
| 3210.273 | 0.00 |
| 3219.575 | 0.00 |
| 3229.974 | 0.00 |
| 3240.441 | 0.00 |
| 3249.919 | 0.00 |
| 3260.515 | 0.00 |
| 3270.111 | 0.00 |
| 3279.764 | 0.00 |
| 3289.474 | 0.00 |
| 3300.33  | 0.00 |
| 3300.33  | 0.00 |
| 3310.162 | 0.00 |
| 3320.053 | 0.00 |
| 3330.003 | 0.00 |
| 3340.013 | 0.00 |
| 3350.084 | 0.00 |
| 3360.215 | 0.00 |
| 3370.408 | 0.00 |
| 3379.52  | 0.00 |
| 3389.831 | 0.00 |
| 3400.204 | 0.00 |
| 3409.478 | 0.00 |
| 3419.973 | 0.00 |
| 3430.532 | 0.00 |
| 3439.972 | 0.00 |
| 3449.465 | 0.00 |
| 3460.208 | 0.00 |

|          |      |
|----------|------|
| 3469.813 | 0.00 |
| 3479.471 | 0.00 |
| 3490.401 | 0.00 |
| 3500.175 | 0.00 |
| 3510.004 | 0.00 |
| 3519.887 | 0.00 |
| 3529.827 | 0.00 |
| 3539.823 | 0.03 |
| 3549.876 | 0.09 |
| 3559.986 | 0.13 |
| 3570.154 | 0.26 |
| 3580.38  | 0.59 |
| 3589.375 | 0.46 |
| 3599.712 | 0.27 |
| 3610.108 | 0.14 |
| 3620.565 | 0.10 |
| 3629.764 | 0.07 |
| 3640.335 | 0.05 |
| 3649.635 | 0.06 |
| 3660.322 | 0.07 |
| 3669.725 | 0.05 |
| 3680.53  | 0.05 |
| 3690.037 | 0.04 |
| 3699.593 | 0.04 |
| 3710.575 | 0.07 |
| 3720.238 | 0.06 |
| 3729.952 | 0.04 |
| 3739.716 | 0.04 |
| 3749.531 | 0.02 |
| 3759.399 | 0.04 |
| 3769.318 | 0.03 |
| 3779.289 | 0.02 |
| 3789.314 | 0.00 |
| 3799.392 | 0.00 |
| 3809.524 | 0.03 |
| 3819.71  | 0.00 |
| 3829.95  | 0.00 |
| 3840.246 | 0.00 |
| 3850.597 | 0.00 |
| 3859.514 | 0.00 |
| 3869.969 | 0.00 |
| 3880.481 | 0.00 |
| 3889.537 | 0.00 |
| 3900.156 | 0.00 |
| 3909.304 | 0.00 |



|          |      |
|----------|------|
| 3920.031 | 0.00 |
| 3929.273 | 0.00 |
| 3940.11  | 0.00 |
| 3949.447 | 0.00 |
| 3960.396 | 0.00 |
| 3969.829 | 0.00 |
| 3979.308 | 0.00 |
| 3990.423 | 0.00 |
| 4000     | 0.00 |

**Zn<sup>2+</sup>(H<sub>2</sub>O)<sub>2</sub>**

| Wavenumber / cm <sup>-1</sup> | Calculated Cross Section / 10 <sup>-21</sup> cm <sup>2</sup> |
|-------------------------------|--------------------------------------------------------------|
| 2240.143                      | 0.01                                                         |
| 2289.902                      | 0.01                                                         |
| 2339.729                      | 0.01                                                         |
| 2390.057                      | 0.01                                                         |
| 2440.215                      | 0.01                                                         |
| 2490.04                       | 0.01                                                         |
| 2540.005                      | 0.01                                                         |
| 2590.003                      | 0.01                                                         |
| 2639.916                      | 0.01                                                         |
| 2690.342                      | 0.01                                                         |
| 2739.726                      | 0.01                                                         |
| 2790.179                      | 0.01                                                         |
| 2840.102                      | 0.01                                                         |
| 2890.173                      | 0.09                                                         |
| 2940.312                      | 0.33                                                         |
| 2990.431                      | 0.27                                                         |
| 3040.438                      | 0.15                                                         |
| 3090.235                      | 0.07                                                         |
| 3139.717                      | 0.06                                                         |
| 3189.793                      | 0.12                                                         |
| 3240.441                      | 0.06                                                         |
| 3249.919                      | 0.05                                                         |
| 3260.515                      | 0.05                                                         |
| 3270.111                      | 0.04                                                         |
| 3279.764                      | 0.01                                                         |
| 3289.474                      | 0.01                                                         |
| 3300.33                       | 0.01                                                         |
| 3310.162                      | 0.01                                                         |
| 3320.053                      | 0.01                                                         |
| 3330.003                      | 0.01                                                         |
| 3340.013                      | 0.01                                                         |
| 3350.084                      | 0.01                                                         |

|          |      |
|----------|------|
| 3360.215 | 0.01 |
| 3370.408 | 0.01 |
| 3379.52  | 0.01 |
| 3389.831 | 0.01 |
| 3400.204 | 0.01 |
| 3409.478 | 0.01 |
| 3419.973 | 0.01 |
| 3430.532 | 0.01 |
| 3439.972 | 0.01 |
| 3449.465 | 0.01 |
| 3460.208 | 0.01 |
| 3469.813 | 0.01 |
| 3479.471 | 0.01 |
| 3490.401 | 0.04 |
| 3500.175 | 0.01 |
| 3510.004 | 0.01 |
| 3519.887 | 0.01 |
| 3529.827 | 0.05 |
| 3539.823 | 0.06 |
| 3549.876 | 0.09 |
| 3559.986 | 0.12 |
| 3570.154 | 0.23 |
| 3580.38  | 0.79 |
| 3589.375 | 2.69 |
| 3599.712 | 2.81 |
| 3610.108 | 1.25 |
| 3620.565 | 0.93 |
| 3629.764 | 0.85 |
| 3640.335 | 1.03 |
| 3649.635 | 0.92 |
| 3660.322 | 0.99 |
| 3669.725 | 0.94 |
| 3680.53  | 0.96 |
| 3690.037 | 0.93 |
| 3699.593 | 0.92 |
| 3710.575 | 0.81 |
| 3720.238 | 0.68 |
| 3729.952 | 0.61 |
| 3739.716 | 0.50 |
| 3749.531 | 0.37 |
| 3759.399 | 0.29 |
| 3769.318 | 0.24 |
| 3779.289 | 0.20 |
| 3789.314 | 0.15 |
| 3799.392 | 0.12 |

|          |      |
|----------|------|
| 3809.524 | 0.10 |
| 3819.71  | 0.11 |
| 3829.95  | 0.10 |
| 3840.246 | 0.07 |
| 3850.597 | 0.06 |
| 3859.514 | 0.06 |
| 3869.969 | 0.01 |
| 3880.481 | 0.01 |
| 3889.537 | 0.01 |
| 3900.156 | 0.01 |
| 3909.304 | 0.01 |
| 3920.031 | 0.01 |
| 3929.273 | 0.01 |
| 3940.11  | 0.01 |
| 3949.447 | 0.01 |
| 3960.396 | 0.01 |
| 3969.829 | 0.01 |
| 3979.308 | 0.01 |
| 3990.423 | 0.01 |
| 4000     | 0.01 |

**Zn<sup>2+</sup>(H<sub>2</sub>O)<sub>3</sub>**

| Wavenumber / cm <sup>-1</sup> | Calculated Cross Section Zn loss /<br>10 <sup>-21</sup> cm <sup>2</sup> | Calculated Cross Section Water loss<br>/ 10 <sup>-21</sup> cm <sup>2</sup> |
|-------------------------------|-------------------------------------------------------------------------|----------------------------------------------------------------------------|
| 2250.225                      | 0.00                                                                    | 0.02                                                                       |
| 2259.887                      | 0.02                                                                    | 0.02                                                                       |
| 2270.148                      | 0.00                                                                    | 0.01                                                                       |
| 2279.982                      | 0.02                                                                    | 0.02                                                                       |
| 2289.902                      | 0.00                                                                    | 0.00                                                                       |
| 2299.908                      | 0.01                                                                    | 0.00                                                                       |
| 2310.002                      | 0.00                                                                    | 0.02                                                                       |
| 2320.186                      | 0.00                                                                    | 0.02                                                                       |
| 2329.916                      | 0.00                                                                    | 0.00                                                                       |
| 2339.729                      | 0.00                                                                    | 0.00                                                                       |
| 2350.176                      | 0.00                                                                    | 0.00                                                                       |
| 2360.16                       | 0.00                                                                    | 0.00                                                                       |
| 2370.23                       | 0.00                                                                    | 0.01                                                                       |
| 2379.819                      | 0.00                                                                    | 0.00                                                                       |
| 2390.057                      | 0.00                                                                    | 0.01                                                                       |
| 2399.808                      | 0.00                                                                    | 0.00                                                                       |
| 2410.219                      | 0.00                                                                    | 0.00                                                                       |
| 2420.136                      | 0.00                                                                    | 0.01                                                                       |
| 2430.134                      | 0.00                                                                    | 0.01                                                                       |
| 2440.215                      | 0.00                                                                    | 0.00                                                                       |

|          |      |      |
|----------|------|------|
| 2449.78  | 0.00 | 0.01 |
| 2460.025 | 0.00 | 0.00 |
| 2469.746 | 0.01 | 0.00 |
| 2480.159 | 0.00 | 0.01 |
| 2490.04  | 0.00 | 0.00 |
| 2500     | 0.01 | 0.01 |
| 2510.04  | 0.00 | 0.01 |
| 2520.161 | 0.00 | 0.01 |
| 2529.724 | 0.00 | 0.00 |
| 2540.005 | 0.00 | 0.00 |
| 2549.72  | 0.00 | 0.00 |
| 2560.164 | 0.00 | 0.01 |
| 2570.033 | 0.01 | 0.01 |
| 2579.979 | 0.00 | 0.00 |
| 2590.003 | 0.00 | 0.01 |
| 2600.104 | 0.00 | 0.00 |
| 2610.285 | 0.00 | 0.01 |
| 2619.859 | 0.00 | 0.01 |
| 2630.195 | 0.00 | 0.01 |
| 2639.916 | 0.00 | 0.01 |
| 2649.709 | 0.00 | 0.01 |
| 2660.282 | 0.00 | 0.01 |
| 2670.227 | 0.00 | 0.01 |
| 2680.247 | 0.01 | 0.01 |
| 2690.342 | 0.00 | 0.01 |
| 2699.784 | 0.01 | 0.02 |
| 2710.027 | 0.00 | 0.01 |
| 2720.348 | 0.01 | 0.00 |
| 2730.003 | 0.01 | 0.02 |
| 2739.726 | 0.00 | 0.02 |
| 2750.275 | 0.01 | 0.02 |
| 2760.144 | 0.01 | 0.02 |
| 2770.083 | 0.01 | 0.02 |
| 2780.095 | 0.02 | 0.02 |
| 2790.179 | 0.02 | 0.03 |
| 2800.336 | 0.02 | 0.03 |
| 2809.778 | 0.02 | 0.03 |
| 2820.079 | 0.03 | 0.04 |
| 2829.655 | 0.03 | 0.05 |
| 2840.102 | 0.04 | 0.05 |
| 2849.815 | 0.04 | 0.05 |
| 2859.594 | 0.05 | 0.06 |
| 2870.264 | 0.06 | 0.07 |
| 2880.184 | 0.07 | 0.09 |
| 2890.173 | 0.08 | 0.11 |

|          |      |      |
|----------|------|------|
| 2900.232 | 0.08 | 0.12 |
| 2910.361 | 0.09 | 0.13 |
| 2919.708 | 0.10 | 0.14 |
| 2929.974 | 0.10 | 0.16 |
| 2940.312 | 0.11 | 0.19 |
| 2949.853 | 0.10 | 0.17 |
| 2960.332 | 0.11 | 0.19 |
| 2970.003 | 0.12 | 0.20 |
| 2979.738 | 0.12 | 0.22 |
| 2990.431 | 0.15 | 0.25 |
| 3000.3   | 0.17 | 0.29 |
| 3010.235 | 0.20 | 0.35 |
| 3020.236 | 0.24 | 0.42 |
| 3030.303 | 0.33 | 0.60 |
| 3040.438 | 0.42 | 0.80 |
| 3049.71  | 0.55 | 1.10 |
| 3059.976 | 0.72 | 1.58 |
| 3070.31  | 0.95 | 2.39 |
| 3079.766 | 1.13 | 3.08 |
| 3090.235 | 1.36 | 3.95 |
| 3099.814 | 1.48 | 4.17 |
| 3110.42  | 1.59 | 4.39 |
| 3120.125 | 1.61 | 4.29 |
| 3129.89  | 1.58 | 4.15 |
| 3139.717 | 1.44 | 3.75 |
| 3149.606 | 1.33 | 3.45 |
| 3159.558 | 1.17 | 3.21 |
| 3169.572 | 1.08 | 3.47 |
| 3179.65  | 0.90 | 2.87 |
| 3189.793 | 0.77 | 2.34 |
| 3200     | 0.67 | 1.90 |
| 3210.273 | 0.60 | 1.73 |
| 3219.575 | 0.56 | 1.61 |
| 3229.974 | 0.52 | 1.49 |
| 3240.441 | 0.52 | 1.39 |
| 3249.919 | 0.50 | 1.30 |
| 3260.515 | 0.56 | 1.45 |
| 3270.111 | 0.53 | 1.26 |
| 3279.764 | 0.49 | 1.16 |
| 3289.474 | 0.47 | 1.14 |
| 3300.33  | 0.45 | 1.07 |
| 3310.162 | 0.45 | 1.09 |
| 3320.053 | 0.46 | 1.05 |
| 3330.003 | 0.44 | 0.92 |
| 3340.013 | 0.43 | 0.93 |

|          |      |      |
|----------|------|------|
| 3350.084 | 0.44 | 0.91 |
| 3360.215 | 0.42 | 0.87 |
| 3370.408 | 0.41 | 0.87 |
| 3379.52  | 0.41 | 0.86 |
| 3389.831 | 0.40 | 0.90 |
| 3400.204 | 0.43 | 0.95 |
| 3409.478 | 0.45 | 1.01 |
| 3419.973 | 0.51 | 1.06 |
| 3430.532 | 0.56 | 1.09 |
| 3439.972 | 0.62 | 1.10 |
| 3449.465 | 0.63 | 1.06 |
| 3460.208 | 0.63 | 1.02 |
| 3469.813 | 0.62 | 0.94 |
| 3479.471 | 0.62 | 0.97 |
| 3490.401 | 0.57 | 0.94 |
| 3500.175 | 0.52 | 0.81 |
| 3510.004 | 0.42 | 0.68 |
| 3519.887 | 0.33 | 0.51 |
| 3529.827 | 0.40 | 0.67 |
| 3539.823 | 0.40 | 0.71 |
| 3549.876 | 0.36 | 0.68 |
| 3559.986 | 0.31 | 0.65 |
| 3570.154 | 0.27 | 0.63 |
| 3580.38  | 0.25 | 0.69 |
| 3589.375 | 0.29 | 1.09 |
| 3599.712 | 0.44 | 1.69 |
| 3610.108 | 0.38 | 1.36 |
| 3620.565 | 0.55 | 1.77 |
| 3629.764 | 0.50 | 2.04 |
| 3640.335 | 0.70 | 2.90 |
| 3649.635 | 0.79 | 3.09 |
| 3660.322 | 1.20 | 4.18 |
| 3669.725 | 1.63 | 5.34 |
| 3680.53  | 1.76 | 6.54 |
| 3690.037 | 1.50 | 5.28 |
| 3699.593 | 1.50 | 4.87 |
| 3710.575 | 1.09 | 3.55 |
| 3720.238 | 0.77 | 2.82 |
| 3729.952 | 0.56 | 2.15 |
| 3739.716 | 0.39 | 1.60 |
| 3749.531 | 0.27 | 1.16 |
| 3759.399 | 0.21 | 0.96 |
| 3769.318 | 0.16 | 0.79 |
| 3779.289 | 0.13 | 0.73 |
| 3789.314 | 0.13 | 0.68 |

|          |      |      |
|----------|------|------|
| 3799.392 | 0.11 | 0.66 |
| 3809.524 | 0.12 | 0.71 |
| 3819.71  | 0.11 | 0.67 |
| 3829.95  | 0.12 | 0.66 |
| 3840.246 | 0.10 | 0.59 |
| 3850.597 | 0.10 | 0.51 |
| 3859.514 | 0.09 | 0.47 |
| 3869.969 | 0.10 | 0.43 |
| 3880.481 | 0.10 | 0.40 |
| 3889.537 | 0.10 | 0.35 |
| 3900.156 | 0.09 | 0.31 |
| 3909.304 | 0.08 | 0.29 |
| 3920.031 | 0.08 | 0.25 |
| 3929.273 | 0.07 | 0.23 |
| 3940.11  | 0.07 | 0.21 |
| 3949.447 | 0.06 | 0.19 |
| 3960.396 | 0.06 | 0.18 |
| 3969.829 | 0.06 | 0.18 |
| 3979.308 | 0.06 | 0.17 |
| 3990.423 | 0.05 | 0.16 |
| 4000     | 0.00 | 0.00 |

**Zn<sup>2+</sup>(H<sub>2</sub>O)<sub>4</sub>**

| Wavenumber / cm <sup>-1</sup> | Calculated Cross Section / 10 <sup>-21</sup> cm <sup>2</sup> |
|-------------------------------|--------------------------------------------------------------|
| 2250.225                      | 0.12                                                         |
| 2259.887                      | 0.12                                                         |
| 2270.148                      | 0.12                                                         |
| 2279.982                      | 0.12                                                         |
| 2289.902                      | 0.12                                                         |
| 2299.908                      | 0.10                                                         |
| 2310.002                      | 0.10                                                         |
| 2320.186                      | 0.10                                                         |
| 2329.916                      | 0.10                                                         |
| 2339.729                      | 0.08                                                         |
| 2350.176                      | 0.10                                                         |
| 2360.16                       | 0.10                                                         |
| 2370.23                       | 0.10                                                         |
| 2379.819                      | 0.10                                                         |
| 2390.057                      | 0.08                                                         |
| 2399.808                      | 0.08                                                         |
| 2410.219                      | 0.08                                                         |
| 2420.136                      | 0.10                                                         |
| 2430.134                      | 0.10                                                         |
| 2440.215                      | 0.08                                                         |

|          |      |
|----------|------|
| 2449.78  | 0.08 |
| 2460.025 | 0.08 |
| 2469.746 | 0.08 |
| 2480.159 | 0.08 |
| 2490.04  | 0.08 |
| 2500     | 0.08 |
| 2510.04  | 0.08 |
| 2520.161 | 0.08 |
| 2529.724 | 0.08 |
| 2540.005 | 0.10 |
| 2549.72  | 0.08 |
| 2560.164 | 0.08 |
| 2570.033 | 0.08 |
| 2579.979 | 0.08 |
| 2590.003 | 0.08 |
| 2600.104 | 0.08 |
| 2610.285 | 0.08 |
| 2619.859 | 0.08 |
| 2630.195 | 0.08 |
| 2639.916 | 0.08 |
| 2649.709 | 0.08 |
| 2660.282 | 0.08 |
| 2670.227 | 0.08 |
| 2680.247 | 0.10 |
| 2690.342 | 0.10 |
| 2699.784 | 0.10 |
| 2710.027 | 0.10 |
| 2720.348 | 0.10 |
| 2730.003 | 0.10 |
| 2739.726 | 0.10 |
| 2750.275 | 0.14 |
| 2760.144 | 0.12 |
| 2770.083 | 0.14 |
| 2780.095 | 0.12 |
| 2790.179 | 0.16 |
| 2800.336 | 0.16 |
| 2809.778 | 0.18 |
| 2820.079 | 0.16 |
| 2829.655 | 0.16 |
| 2840.102 | 0.20 |
| 2849.815 | 0.20 |
| 2859.594 | 0.24 |
| 2870.264 | 0.28 |
| 2880.184 | 0.41 |
| 2890.173 | 0.45 |



|          |       |
|----------|-------|
| 2900.232 | 0.45  |
| 2910.361 | 0.57  |
| 2919.708 | 0.65  |
| 2929.974 | 0.73  |
| 2940.312 | 0.90  |
| 2949.853 | 0.92  |
| 2960.332 | 1.00  |
| 2970.003 | 1.10  |
| 2979.738 | 1.36  |
| 2990.431 | 1.40  |
| 3000.3   | 1.51  |
| 3030.303 | 1.55  |
| 3040.438 | 1.55  |
| 3049.71  | 1.85  |
| 3059.976 | 2.06  |
| 3070.31  | 2.30  |
| 3079.766 | 2.44  |
| 3090.235 | 3.09  |
| 3099.814 | 3.68  |
| 3110.42  | 4.86  |
| 3120.125 | 5.58  |
| 3129.89  | 8.51  |
| 3139.717 | 12.19 |
| 3149.606 | 17.38 |
| 3159.558 | 19.49 |
| 3169.572 | 24.52 |
| 3179.65  | 26.35 |
| 3189.793 | 28.75 |
| 3200     | 31.66 |
| 3210.273 | 35.31 |
| 3219.575 | 33.78 |
| 3229.974 | 29.26 |
| 3240.441 | 26.27 |
| 3249.919 | 24.72 |
| 3260.515 | 22.29 |
| 3270.111 | 21.82 |
| 3279.764 | 18.92 |
| 3289.474 | 18.25 |
| 3300.33  | 17.26 |
| 3310.162 | 14.88 |
| 3320.053 | 11.84 |
| 3330.003 | 10.60 |
| 3340.013 | 8.36  |
| 3350.084 | 6.90  |
| 3360.215 | 6.23  |

|          |       |
|----------|-------|
| 3370.408 | 5.58  |
| 3379.52  | 5.53  |
| 3389.831 | 5.53  |
| 3400.204 | 5.92  |
| 3409.478 | 6.33  |
| 3419.973 | 7.55  |
| 3430.532 | 8.81  |
| 3439.972 | 9.04  |
| 3449.465 | 9.73  |
| 3460.208 | 9.42  |
| 3469.813 | 9.46  |
| 3479.471 | 9.30  |
| 3490.401 | 9.87  |
| 3500.175 | 10.09 |
| 3510.004 | 10.34 |
| 3519.887 | 9.73  |
| 3529.827 | 9.08  |
| 3539.823 | 7.55  |
| 3549.876 | 10.07 |
| 3559.986 | 8.16  |
| 3570.154 | 6.76  |
| 3580.38  | 5.49  |
| 3589.375 | 4.23  |
| 3599.712 | 3.87  |
| 3610.108 | 3.36  |
| 3620.565 | 3.54  |
| 3629.764 | 3.40  |
| 3640.335 | 4.03  |
| 3649.635 | 3.80  |
| 3660.322 | 5.96  |
| 3669.725 | 7.02  |
| 3680.53  | 6.23  |
| 3690.037 | 8.91  |
| 3699.593 | 15.22 |
| 3710.575 | 14.00 |
| 3720.238 | 11.52 |
| 3729.952 | 11.86 |
| 3739.716 | 5.90  |
| 3749.531 | 7.45  |
| 3759.399 | 4.78  |
| 3769.318 | 2.05  |
| 3779.289 | 1.28  |
| 3789.314 | 0.94  |
| 3799.392 | 0.79  |
| 3809.524 | 0.69  |

|          |      |
|----------|------|
| 3819.71  | 0.69 |
| 3829.95  | 0.75 |
| 3840.246 | 0.75 |
| 3850.597 | 0.79 |
| 3859.514 | 0.63 |
| 3869.969 | 0.47 |
| 3880.481 | 0.39 |
| 3889.537 | 0.35 |
| 3900.156 | 0.35 |
| 3909.304 | 0.33 |
| 3920.031 | 0.28 |
| 3929.273 | 0.24 |
| 3940.11  | 0.20 |
| 3949.447 | 0.18 |
| 3960.396 | 0.16 |
| 3969.829 | 0.14 |
| 3979.308 | 0.12 |
| 3990.423 | 0.10 |
| 4000     | 0.10 |

**Zn<sup>2+</sup>(H<sub>2</sub>O)<sub>5</sub>**

| <b>Wavenumber / cm<sup>-1</sup></b> | <b>Calculated Cross Section / 10<sup>-21</sup> cm<sup>2</sup></b> |
|-------------------------------------|-------------------------------------------------------------------|
| 2250.225                            | 0.31                                                              |
| 2259.887                            | 0.37                                                              |
| 2270.148                            | 0.37                                                              |
| 2279.982                            | 0.37                                                              |
| 2289.902                            | 0.37                                                              |
| 2299.908                            | 0.37                                                              |
| 2310.002                            | 0.31                                                              |
| 2320.186                            | 0.31                                                              |
| 2329.916                            | 0.31                                                              |
| 2339.729                            | 0.31                                                              |
| 2350.176                            | 0.31                                                              |
| 2360.16                             | 0.31                                                              |
| 2370.23                             | 0.31                                                              |
| 2379.819                            | 0.31                                                              |
| 2390.057                            | 0.31                                                              |
| 2399.808                            | 0.31                                                              |
| 2410.219                            | 0.31                                                              |
| 2420.136                            | 0.31                                                              |
| 2430.134                            | 0.31                                                              |
| 2440.215                            | 0.31                                                              |
| 2449.78                             | 0.31                                                              |
| 2460.025                            | 0.31                                                              |

|          |      |
|----------|------|
| 2469.746 | 0.24 |
| 2480.159 | 0.31 |
| 2490.04  | 0.24 |
| 2500     | 0.24 |
| 2510.04  | 0.24 |
| 2520.161 | 0.24 |
| 2529.724 | 0.24 |
| 2540.005 | 0.24 |
| 2549.72  | 0.24 |
| 2560.164 | 0.18 |
| 2570.033 | 0.18 |
| 2579.979 | 0.18 |
| 2590.003 | 0.18 |
| 2600.104 | 0.18 |
| 2610.285 | 0.18 |
| 2619.859 | 0.24 |
| 2630.195 | 0.24 |
| 2639.916 | 0.24 |
| 2649.709 | 0.18 |
| 2660.282 | 0.24 |
| 2670.227 | 0.24 |
| 2680.247 | 0.24 |
| 2690.342 | 0.24 |
| 2699.784 | 0.24 |
| 2710.027 | 0.24 |
| 2720.348 | 0.24 |
| 2730.003 | 0.24 |
| 2739.726 | 0.24 |
| 2750.275 | 0.31 |
| 2760.144 | 0.37 |
| 2770.083 | 0.43 |
| 2780.095 | 0.43 |
| 2790.179 | 0.49 |
| 2800.336 | 0.49 |
| 2809.778 | 0.61 |
| 2820.079 | 0.67 |
| 2829.655 | 0.67 |
| 2840.102 | 0.73 |
| 2849.815 | 0.85 |
| 2859.594 | 0.85 |
| 2870.264 | 0.98 |
| 2880.184 | 1.10 |
| 2890.173 | 1.16 |
| 2900.232 | 1.22 |
| 2910.361 | 1.34 |

|          |       |
|----------|-------|
| 2919.708 | 1.53  |
| 2929.974 | 1.59  |
| 2940.312 | 1.83  |
| 2949.853 | 1.95  |
| 2960.332 | 2.08  |
| 2970.003 | 2.20  |
| 2979.738 | 2.50  |
| 2990.431 | 2.81  |
| 3000.3   | 3.17  |
| 3010.235 | 3.30  |
| 3020.236 | 3.66  |
| 3030.303 | 4.03  |
| 3040.438 | 4.34  |
| 3049.71  | 4.94  |
| 3059.976 | 5.25  |
| 3070.31  | 6.04  |
| 3079.766 | 6.29  |
| 3090.235 | 6.78  |
| 3099.814 | 6.96  |
| 3110.42  | 7.69  |
| 3120.125 | 8.06  |
| 3129.89  | 8.97  |
| 3139.717 | 10.01 |
| 3149.606 | 12.27 |
| 3159.558 | 14.41 |
| 3169.572 | 18.07 |
| 3179.65  | 21.85 |
| 3189.793 | 28.87 |
| 3200     | 38.46 |
| 3210.273 | 43.78 |
| 3219.575 | 48.04 |
| 3229.974 | 49.27 |
| 3240.441 | 49.27 |
| 3249.919 | 47.49 |
| 3260.515 | 46.28 |
| 3270.111 | 46.40 |
| 3279.764 | 45.17 |
| 3289.474 | 45.47 |
| 3300.33  | 43.23 |
| 3310.162 | 37.49 |
| 3320.053 | 32.66 |
| 3330.003 | 26.92 |
| 3340.013 | 23.02 |
| 3350.084 | 21.12 |
| 3360.215 | 18.62 |

|          |       |
|----------|-------|
| 3370.408 | 16.61 |
| 3379.52  | 15.32 |
| 3389.831 | 14.16 |
| 3400.204 | 14.29 |
| 3409.478 | 14.77 |
| 3419.973 | 15.14 |
| 3430.532 | 15.39 |
| 3439.972 | 16.36 |
| 3449.465 | 17.21 |
| 3460.208 | 18.07 |
| 3469.813 | 18.74 |
| 3479.471 | 20.27 |
| 3490.401 | 21.80 |
| 3500.175 | 21.19 |
| 3510.004 | 19.66 |
| 3519.887 | 15.87 |
| 3529.827 | 19.29 |
| 3539.823 | 18.25 |
| 3549.876 | 16.48 |
| 3559.986 | 14.16 |
| 3570.154 | 11.60 |
| 3580.38  | 9.83  |
| 3589.375 | 8.67  |
| 3599.712 | 7.94  |
| 3610.108 | 7.75  |
| 3620.565 | 6.66  |
| 3629.764 | 6.90  |
| 3640.335 | 10.07 |
| 3649.635 | 12.76 |
| 3660.322 | 9.04  |
| 3669.725 | 9.64  |
| 3680.53  | 17.04 |
| 3690.037 | 15.81 |
| 3699.593 | 11.72 |
| 3710.575 | 16.91 |
| 3720.238 | 11.42 |
| 3729.952 | 13.49 |
| 3739.716 | 13.61 |
| 3749.531 | 6.78  |
| 3759.399 | 4.46  |
| 3769.318 | 3.30  |
| 3779.289 | 2.87  |
| 3789.314 | 2.81  |
| 3799.392 | 2.93  |
| 3809.524 | 2.93  |

|          |      |
|----------|------|
| 3819.71  | 3.11 |
| 3829.95  | 3.42 |
| 3840.246 | 2.32 |
| 3850.597 | 1.65 |
| 3859.514 | 1.34 |
| 3869.969 | 1.10 |
| 3880.481 | 0.98 |
| 3889.537 | 0.92 |
| 3900.156 | 0.73 |
| 3909.304 | 0.61 |
| 3920.031 | 0.55 |
| 3929.273 | 0.49 |
| 3940.11  | 0.43 |
| 3949.447 | 0.37 |
| 3960.396 | 0.31 |
| 3969.829 | 0.31 |
| 3979.308 | 0.31 |
| 3990.423 | 0.24 |
| 4000     | 0.31 |

**Zn<sup>2+</sup>(H<sub>2</sub>O)<sub>6</sub>**

| Wavenumber / cm <sup>-1</sup> | Calculated Cross Section / 10 <sup>-21</sup> cm <sup>2</sup> |
|-------------------------------|--------------------------------------------------------------|
| 2250.225                      | 0.73                                                         |
| 2259.887                      | 0.73                                                         |
| 2270.148                      | 0.73                                                         |
| 2279.982                      | 0.79                                                         |
| 2289.902                      | 0.85                                                         |
| 2299.908                      | 0.79                                                         |
| 2310.002                      | 0.79                                                         |
| 2320.186                      | 0.73                                                         |
| 2329.916                      | 0.79                                                         |
| 2339.729                      | 0.73                                                         |
| 2350.176                      | 0.73                                                         |
| 2360.16                       | 0.73                                                         |
| 2370.23                       | 0.67                                                         |
| 2379.819                      | 0.73                                                         |
| 2390.057                      | 0.73                                                         |
| 2399.808                      | 0.73                                                         |
| 2410.219                      | 0.73                                                         |
| 2420.136                      | 0.79                                                         |
| 2430.134                      | 0.79                                                         |
| 2440.215                      | 0.73                                                         |
| 2449.78                       | 0.79                                                         |
| 2460.025                      | 0.73                                                         |

|          |      |
|----------|------|
| 2469.746 | 0.67 |
| 2480.159 | 0.67 |
| 2490.04  | 0.67 |
| 2500     | 0.67 |
| 2510.04  | 0.61 |
| 2520.161 | 0.55 |
| 2529.724 | 0.55 |
| 2540.005 | 0.55 |
| 2549.72  | 0.49 |
| 2560.164 | 0.49 |
| 2570.033 | 0.49 |
| 2579.979 | 0.49 |
| 2590.003 | 0.49 |
| 2600.104 | 0.43 |
| 2610.285 | 0.43 |
| 2619.859 | 0.43 |
| 2630.195 | 0.43 |
| 2639.916 | 0.43 |
| 2649.709 | 0.43 |
| 2660.282 | 0.43 |
| 2670.227 | 0.43 |
| 2680.247 | 0.43 |
| 2690.342 | 0.43 |
| 2699.784 | 0.49 |
| 2710.027 | 0.43 |
| 2720.348 | 0.49 |
| 2730.003 | 0.49 |
| 2739.726 | 0.49 |
| 2750.275 | 0.49 |
| 2760.144 | 0.55 |
| 2770.083 | 0.55 |
| 2780.095 | 0.55 |
| 2790.179 | 0.55 |
| 2800.336 | 0.61 |
| 2809.778 | 0.67 |
| 2820.079 | 0.67 |
| 2829.655 | 0.67 |
| 2840.102 | 0.73 |
| 2849.815 | 0.79 |
| 2859.594 | 0.85 |
| 2870.264 | 0.92 |
| 2880.184 | 1.04 |
| 2890.173 | 1.22 |
| 2900.232 | 1.40 |
| 2910.361 | 1.59 |



|          |       |
|----------|-------|
| 2919.708 | 1.77  |
| 2929.974 | 2.14  |
| 2940.312 | 2.56  |
| 2949.853 | 2.87  |
| 2960.332 | 3.48  |
| 2970.003 | 3.60  |
| 2979.738 | 3.85  |
| 2990.431 | 4.15  |
| 3000.3   | 4.09  |
| 3010.235 | 4.09  |
| 3020.236 | 4.21  |
| 3030.303 | 4.21  |
| 3040.438 | 4.40  |
| 3049.71  | 4.58  |
| 3059.976 | 4.70  |
| 3070.31  | 5.07  |
| 3079.766 | 5.31  |
| 3090.235 | 5.56  |
| 3099.814 | 6.17  |
| 3110.42  | 6.59  |
| 3120.125 | 7.02  |
| 3129.89  | 7.39  |
| 3139.717 | 7.75  |
| 3149.606 | 8.73  |
| 3159.558 | 9.89  |
| 3169.572 | 11.72 |
| 3179.65  | 13.86 |
| 3189.793 | 17.21 |
| 3200     | 22.47 |
| 3210.273 | 28.39 |
| 3219.575 | 31.31 |
| 3229.974 | 33.33 |
| 3240.441 | 34.56 |
| 3249.919 | 34.61 |
| 3260.515 | 35.84 |
| 3270.111 | 37.12 |
| 3279.764 | 38.46 |
| 3289.474 | 43.76 |
| 3300.33  | 50.25 |
| 3310.162 | 56.29 |
| 3320.053 | 58.36 |
| 3330.003 | 54.27 |
| 3340.013 | 50.79 |
| 3350.084 | 47.38 |
| 3360.215 | 42.31 |

|          |       |
|----------|-------|
| 3370.408 | 37.79 |
| 3379.52  | 34.18 |
| 3389.831 | 29.85 |
| 3400.204 | 27.29 |
| 3409.478 | 25.58 |
| 3419.973 | 25.03 |
| 3430.532 | 25.16 |
| 3439.972 | 26.19 |
| 3449.465 | 25.39 |
| 3460.208 | 23.75 |
| 3469.813 | 23.20 |
| 3479.471 | 22.28 |
| 3490.401 | 21.74 |
| 3500.175 | 19.54 |
| 3510.004 | 16.97 |
| 3519.887 | 13.49 |
| 3529.827 | 16.97 |
| 3539.823 | 17.52 |
| 3549.876 | 16.12 |
| 3559.986 | 13.31 |
| 3570.154 | 11.23 |
| 3580.38  | 9.52  |
| 3589.375 | 8.06  |
| 3599.712 | 6.84  |
| 3610.108 | 6.29  |
| 3620.565 | 5.56  |
| 3629.764 | 5.49  |
| 3640.335 | 8.30  |
| 3649.635 | 15.02 |
| 3660.322 | 10.87 |
| 3669.725 | 13.49 |
| 3680.53  | 24.24 |
| 3690.037 | 29.30 |
| 3699.593 | 19.23 |
| 3710.575 | 15.94 |
| 3720.238 | 12.94 |
| 3729.952 | 14.16 |
| 3739.716 | 18.56 |
| 3749.531 | 10.07 |
| 3759.399 | 6.84  |
| 3769.318 | 5.43  |
| 3779.289 | 4.70  |
| 3789.314 | 4.64  |
| 3799.392 | 4.46  |
| 3809.524 | 4.27  |

|          |      |
|----------|------|
| 3819.71  | 4.15 |
| 3829.95  | 4.58 |
| 3840.246 | 2.81 |
| 3850.597 | 2.14 |
| 3859.514 | 1.83 |
| 3869.969 | 1.47 |
| 3880.481 | 1.22 |
| 3889.537 | 1.04 |
| 3900.156 | 0.85 |
| 3909.304 | 0.79 |
| 3920.031 | 0.73 |
| 3929.273 | 0.67 |
| 3940.11  | 0.61 |
| 3949.447 | 0.49 |
| 3960.396 | 0.55 |
| 3969.829 | 0.49 |
| 3979.308 | 0.49 |
| 3990.423 | 0.49 |
| 4000     | 0.55 |

**Zn<sup>2+</sup>(H<sub>2</sub>O)<sub>7</sub>**

| Wavenumber / cm <sup>-1</sup> | Calculated Cross Section / 10 <sup>-21</sup> cm <sup>2</sup> |
|-------------------------------|--------------------------------------------------------------|
| 2250.225                      | 0.95                                                         |
| 2259.887                      | 0.85                                                         |
| 2270.148                      | 0.82                                                         |
| 2279.982                      | 0.89                                                         |
| 2289.902                      | 0.79                                                         |
| 2299.908                      | 0.79                                                         |
| 2310.002                      | 0.85                                                         |
| 2320.186                      | 0.70                                                         |
| 2329.916                      | 0.70                                                         |
| 2339.729                      | 0.70                                                         |
| 2350.176                      | 0.67                                                         |
| 2360.16                       | 0.73                                                         |
| 2370.23                       | 0.70                                                         |
| 2379.819                      | 0.70                                                         |
| 2390.057                      | 0.70                                                         |
| 2399.808                      | 0.70                                                         |
| 2410.219                      | 0.67                                                         |
| 2420.136                      | 0.67                                                         |
| 2430.134                      | 0.70                                                         |
| 2440.215                      | 0.67                                                         |
| 2449.78                       | 0.70                                                         |
| 2460.025                      | 0.67                                                         |

|          |      |
|----------|------|
| 2469.746 | 0.61 |
| 2480.159 | 0.64 |
| 2490.04  | 0.61 |
| 2500     | 0.58 |
| 2510.04  | 0.64 |
| 2520.161 | 0.58 |
| 2529.724 | 0.55 |
| 2540.005 | 0.55 |
| 2549.72  | 0.55 |
| 2560.164 | 0.52 |
| 2570.033 | 0.52 |
| 2579.979 | 0.52 |
| 2590.003 | 0.52 |
| 2600.104 | 0.52 |
| 2610.285 | 0.52 |
| 2619.859 | 0.49 |
| 2630.195 | 0.52 |
| 2639.916 | 0.49 |
| 2649.709 | 0.49 |
| 2660.282 | 0.49 |
| 2670.227 | 0.52 |
| 2680.247 | 0.52 |
| 2690.342 | 0.49 |
| 2699.784 | 0.49 |
| 2710.027 | 0.49 |
| 2720.348 | 0.49 |
| 2730.003 | 0.49 |
| 2739.726 | 0.49 |
| 2750.275 | 0.52 |
| 2760.144 | 0.49 |
| 2770.083 | 0.49 |
| 2780.095 | 0.52 |
| 2790.179 | 0.55 |
| 2800.336 | 0.52 |
| 2809.778 | 0.58 |
| 2820.079 | 0.61 |
| 2829.655 | 0.58 |
| 2840.102 | 0.64 |
| 2849.815 | 0.67 |
| 2859.594 | 0.67 |
| 2870.264 | 0.70 |
| 2880.184 | 0.79 |
| 2890.173 | 0.79 |
| 2900.232 | 0.85 |
| 2910.361 | 0.95 |

|          |       |
|----------|-------|
| 2919.708 | 0.92  |
| 2929.974 | 1.07  |
| 2940.312 | 1.13  |
| 2949.853 | 1.31  |
| 2960.332 | 1.53  |
| 2970.003 | 1.71  |
| 2979.738 | 2.01  |
| 2990.431 | 2.35  |
| 3000.3   | 2.75  |
| 3010.235 | 3.11  |
| 3020.236 | 3.51  |
| 3030.303 | 3.82  |
| 3040.438 | 4.06  |
| 3049.71  | 4.18  |
| 3059.976 | 4.36  |
| 3070.31  | 4.61  |
| 3079.766 | 4.64  |
| 3090.235 | 4.88  |
| 3099.814 | 5.13  |
| 3110.42  | 5.59  |
| 3120.125 | 5.83  |
| 3129.89  | 6.47  |
| 3139.717 | 6.71  |
| 3149.606 | 7.39  |
| 3159.558 | 8.21  |
| 3169.572 | 9.67  |
| 3179.65  | 10.62 |
| 3189.793 | 12.54 |
| 3200     | 15.45 |
| 3210.273 | 16.61 |
| 3219.575 | 17.24 |
| 3229.974 | 16.76 |
| 3240.441 | 17.49 |
| 3249.919 | 17.55 |
| 3260.515 | 17.98 |
| 3270.111 | 19.02 |
| 3279.764 | 19.23 |
| 3289.474 | 20.45 |
| 3300.33  | 21.37 |
| 3310.162 | 23.69 |
| 3320.053 | 27.41 |
| 3330.003 | 31.50 |
| 3340.013 | 36.69 |
| 3350.084 | 41.18 |
| 3360.215 | 41.39 |

|          |       |
|----------|-------|
| 3370.408 | 40.48 |
| 3379.52  | 39.40 |
| 3389.831 | 36.26 |
| 3400.204 | 31.93 |
| 3409.478 | 28.93 |
| 3419.973 | 26.07 |
| 3430.532 | 25.25 |
| 3439.972 | 24.94 |
| 3449.465 | 25.06 |
| 3460.208 | 24.48 |
| 3469.813 | 23.87 |
| 3479.471 | 22.65 |
| 3490.401 | 22.32 |
| 3500.175 | 20.21 |
| 3510.004 | 17.95 |
| 3519.887 | 14.62 |
| 3529.827 | 17.70 |
| 3539.823 | 17.70 |
| 3549.876 | 16.45 |
| 3559.986 | 14.19 |
| 3570.154 | 12.39 |
| 3580.38  | 10.50 |
| 3589.375 | 9.03  |
| 3599.712 | 7.51  |
| 3610.108 | 6.20  |
| 3620.565 | 5.16  |
| 3629.764 | 4.76  |
| 3640.335 | 5.83  |
| 3649.635 | 9.80  |
| 3660.322 | 6.81  |
| 3669.725 | 8.64  |
| 3680.53  | 18.07 |
| 3690.037 | 28.85 |
| 3699.593 | 24.02 |
| 3710.575 | 16.76 |
| 3720.238 | 12.15 |
| 3729.952 | 10.99 |
| 3739.716 | 12.36 |
| 3749.531 | 7.60  |
| 3759.399 | 5.62  |
| 3769.318 | 4.36  |
| 3779.289 | 3.72  |
| 3789.314 | 3.48  |
| 3799.392 | 3.20  |
| 3809.524 | 3.17  |

|          |      |
|----------|------|
| 3819.71  | 2.99 |
| 3829.95  | 2.81 |
| 3840.246 | 2.14 |
| 3850.597 | 1.62 |
| 3859.514 | 1.40 |
| 3869.969 | 1.13 |
| 3880.481 | 0.98 |
| 3889.537 | 0.89 |
| 3900.156 | 0.79 |
| 3909.304 | 0.67 |
| 3920.031 | 0.64 |
| 3929.273 | 0.55 |
| 3940.11  | 0.55 |
| 3949.447 | 0.55 |
| 3960.396 | 0.52 |
| 3969.829 | 0.52 |
| 3979.308 | 0.52 |
| 3990.423 | 0.52 |
| 4000     | 0.55 |

**Zn<sup>2+</sup>(H<sub>2</sub>O)<sub>8</sub>**

| Wavenumber / cm <sup>-1</sup> | Calculated Cross Section / 10 <sup>-21</sup> cm <sup>2</sup> |
|-------------------------------|--------------------------------------------------------------|
| 2250.225                      | 0.79                                                         |
| 2259.887                      | 0.73                                                         |
| 2270.148                      | 0.76                                                         |
| 2279.982                      | 0.61                                                         |
| 2289.902                      | 0.64                                                         |
| 2299.908                      | 0.58                                                         |
| 2310.002                      | 0.67                                                         |
| 2320.186                      | 0.61                                                         |
| 2329.916                      | 0.55                                                         |
| 2339.729                      | 0.58                                                         |
| 2350.176                      | 0.61                                                         |
| 2360.16                       | 0.55                                                         |
| 2370.23                       | 0.61                                                         |
| 2379.819                      | 0.58                                                         |
| 2390.057                      | 0.55                                                         |
| 2399.808                      | 0.55                                                         |
| 2410.219                      | 0.52                                                         |
| 2420.136                      | 0.52                                                         |
| 2430.134                      | 0.52                                                         |
| 2440.215                      | 0.52                                                         |
| 2449.78                       | 0.49                                                         |
| 2460.025                      | 0.49                                                         |

|          |      |
|----------|------|
| 2469.746 | 0.52 |
| 2480.159 | 0.49 |
| 2490.04  | 0.40 |
| 2500     | 0.40 |
| 2510.04  | 0.37 |
| 2520.161 | 0.40 |
| 2529.724 | 0.43 |
| 2540.005 | 0.40 |
| 2549.72  | 0.46 |
| 2560.164 | 0.37 |
| 2570.033 | 0.31 |
| 2579.979 | 0.37 |
| 2590.003 | 0.37 |
| 2600.104 | 0.34 |
| 2610.285 | 0.34 |
| 2619.859 | 0.37 |
| 2630.195 | 0.31 |
| 2639.916 | 0.31 |
| 2649.709 | 0.31 |
| 2660.282 | 0.34 |
| 2670.227 | 0.37 |
| 2680.247 | 0.34 |
| 2690.342 | 0.34 |
| 2699.784 | 0.40 |
| 2710.027 | 0.34 |
| 2720.348 | 0.37 |
| 2730.003 | 0.34 |
| 2739.726 | 0.37 |
| 2750.275 | 0.40 |
| 2760.144 | 0.37 |
| 2770.083 | 0.34 |
| 2780.095 | 0.37 |
| 2790.179 | 0.43 |
| 2800.336 | 0.37 |
| 2809.778 | 0.43 |
| 2820.079 | 0.43 |
| 2829.655 | 0.40 |
| 2840.102 | 0.43 |
| 2849.815 | 0.49 |
| 2859.594 | 0.55 |
| 2870.264 | 0.52 |
| 2880.184 | 0.52 |
| 2890.173 | 0.61 |
| 2900.232 | 0.70 |
| 2910.361 | 0.67 |



|          |       |
|----------|-------|
| 2919.708 | 0.79  |
| 2929.974 | 0.79  |
| 2940.312 | 0.98  |
| 2949.853 | 1.04  |
| 2960.332 | 1.13  |
| 2970.003 | 1.22  |
| 2979.738 | 1.22  |
| 2990.431 | 1.40  |
| 3000.3   | 1.65  |
| 3010.235 | 1.92  |
| 3020.236 | 2.17  |
| 3030.303 | 2.53  |
| 3040.438 | 2.75  |
| 3049.71  | 3.17  |
| 3059.976 | 3.54  |
| 3070.31  | 4.03  |
| 3079.766 | 4.33  |
| 3090.235 | 4.98  |
| 3099.814 | 5.34  |
| 3110.42  | 6.17  |
| 3120.125 | 6.78  |
| 3129.89  | 7.39  |
| 3139.717 | 8.09  |
| 3149.606 | 9.25  |
| 3159.558 | 10.35 |
| 3169.572 | 12.03 |
| 3179.65  | 13.92 |
| 3189.793 | 16.09 |
| 3200     | 18.59 |
| 3210.273 | 18.62 |
| 3219.575 | 18.59 |
| 3229.974 | 19.02 |
| 3240.441 | 18.56 |
| 3249.919 | 18.59 |
| 3260.515 | 18.35 |
| 3270.111 | 18.86 |
| 3279.764 | 18.50 |
| 3289.474 | 18.80 |
| 3300.33  | 19.35 |
| 3310.162 | 19.72 |
| 3320.053 | 21.12 |
| 3330.003 | 23.23 |
| 3340.013 | 25.64 |
| 3350.084 | 30.49 |
| 3360.215 | 35.32 |

|          |       |
|----------|-------|
| 3370.408 | 40.17 |
| 3379.52  | 41.87 |
| 3389.831 | 41.79 |
| 3400.204 | 42.00 |
| 3409.478 | 38.97 |
| 3419.973 | 38.22 |
| 3430.532 | 36.76 |
| 3439.972 | 35.99 |
| 3449.465 | 35.49 |
| 3460.208 | 34.89 |
| 3469.813 | 33.21 |
| 3479.471 | 32.75 |
| 3490.401 | 31.05 |
| 3500.175 | 28.14 |
| 3510.004 | 24.33 |
| 3519.887 | 18.89 |
| 3529.827 | 22.62 |
| 3539.823 | 22.37 |
| 3549.876 | 20.79 |
| 3559.986 | 18.68 |
| 3570.154 | 15.90 |
| 3580.38  | 13.31 |
| 3589.375 | 11.48 |
| 3599.712 | 9.34  |
| 3610.108 | 7.66  |
| 3620.565 | 6.14  |
| 3629.764 | 5.28  |
| 3640.335 | 5.59  |
| 3649.635 | 8.00  |
| 3660.322 | 6.14  |
| 3669.725 | 7.08  |
| 3680.53  | 18.04 |
| 3690.037 | 34.00 |
| 3699.593 | 28.72 |
| 3710.575 | 20.33 |
| 3720.238 | 16.21 |
| 3729.952 | 12.15 |
| 3739.716 | 11.63 |
| 3749.531 | 7.57  |
| 3759.399 | 5.40  |
| 3769.318 | 4.12  |
| 3779.289 | 3.48  |
| 3789.314 | 2.99  |
| 3799.392 | 2.72  |
| 3809.524 | 2.69  |

|          |      |
|----------|------|
| 3819.71  | 2.44 |
| 3829.95  | 2.32 |
| 3840.246 | 1.83 |
| 3850.597 | 1.50 |
| 3859.514 | 1.25 |
| 3869.969 | 0.98 |
| 3880.481 | 0.95 |
| 3889.537 | 0.73 |
| 3900.156 | 0.67 |
| 3909.304 | 0.61 |
| 3920.031 | 0.49 |
| 3929.273 | 0.49 |
| 3940.11  | 0.43 |
| 3949.447 | 0.43 |
| 3960.396 | 0.40 |
| 3969.829 | 0.43 |
| 3979.308 | 0.52 |
| 3990.423 | 0.43 |
| 4000     | 0.43 |

**Zn<sup>2+</sup>(H<sub>2</sub>O)<sub>10</sub>**

| Wavenumber / cm <sup>-1</sup> | Calculated Cross Section / 10 <sup>-21</sup> cm <sup>2</sup> |
|-------------------------------|--------------------------------------------------------------|
| 2250.225                      | 1.40                                                         |
| 2259.887                      | 1.53                                                         |
| 2270.148                      | 1.47                                                         |
| 2279.982                      | 1.59                                                         |
| 2289.902                      | 1.59                                                         |
| 2299.908                      | 1.65                                                         |
| 2310.002                      | 1.53                                                         |
| 2320.186                      | 1.47                                                         |
| 2329.916                      | 1.53                                                         |
| 2339.729                      | 1.40                                                         |
| 2350.176                      | 1.47                                                         |
| 2360.16                       | 1.47                                                         |
| 2370.23                       | 1.40                                                         |
| 2379.819                      | 1.47                                                         |
| 2390.057                      | 1.40                                                         |
| 2399.808                      | 1.47                                                         |
| 2410.219                      | 1.34                                                         |
| 2420.136                      | 1.47                                                         |
| 2430.134                      | 1.34                                                         |
| 2440.215                      | 1.34                                                         |
| 2449.78                       | 1.40                                                         |

|          |      |
|----------|------|
| 2460.025 | 1.40 |
| 2469.746 | 1.28 |
| 2480.159 | 1.40 |
| 2490.04  | 1.28 |
| 2500     | 1.34 |
| 2510.04  | 1.40 |
| 2520.161 | 1.34 |
| 2529.724 | 1.16 |
| 2540.005 | 1.16 |
| 2549.72  | 1.10 |
| 2560.164 | 1.28 |
| 2570.033 | 1.28 |
| 2579.979 | 1.22 |
| 2590.003 | 1.16 |
| 2600.104 | 1.16 |
| 2610.285 | 1.16 |
| 2619.859 | 1.16 |
| 2630.195 | 1.04 |
| 2639.916 | 1.10 |
| 2649.709 | 1.04 |
| 2660.282 | 1.22 |
| 2670.227 | 1.16 |
| 2680.247 | 1.04 |
| 2690.342 | 1.16 |
| 2699.784 | 0.98 |
| 2710.027 | 1.16 |
| 2720.348 | 1.16 |
| 2730.003 | 1.16 |
| 2739.726 | 1.10 |
| 2750.275 | 1.28 |
| 2760.144 | 1.22 |
| 2770.083 | 1.16 |
| 2780.095 | 1.16 |
| 2790.179 | 1.28 |
| 2800.336 | 1.10 |
| 2809.778 | 1.16 |
| 2820.079 | 1.34 |
| 2829.655 | 1.22 |
| 2840.102 | 1.40 |
| 2849.815 | 1.34 |
| 2859.594 | 1.53 |
| 2870.264 | 1.40 |
| 2880.184 | 1.53 |
| 2890.173 | 1.53 |
| 2900.232 | 1.59 |

|          |       |
|----------|-------|
| 2910.361 | 1.83  |
| 2919.708 | 1.71  |
| 2929.974 | 2.01  |
| 2940.312 | 2.14  |
| 2949.853 | 2.14  |
| 2960.332 | 2.38  |
| 2970.003 | 2.56  |
| 2979.738 | 2.69  |
| 2990.431 | 3.11  |
| 3000.3   | 3.17  |
| 3010.235 | 3.42  |
| 3020.236 | 3.79  |
| 3030.303 | 4.15  |
| 3040.438 | 4.40  |
| 3049.71  | 5.01  |
| 3059.976 | 5.37  |
| 3070.31  | 6.04  |
| 3079.766 | 6.41  |
| 3090.235 | 7.02  |
| 3099.814 | 7.69  |
| 3110.42  | 8.43  |
| 3120.125 | 9.10  |
| 3129.89  | 10.07 |
| 3139.717 | 11.35 |
| 3149.606 | 12.64 |
| 3159.558 | 14.16 |
| 3169.572 | 16.73 |
| 3179.65  | 18.74 |
| 3189.793 | 22.46 |
| 3200     | 26.13 |
| 3210.273 | 28.88 |
| 3219.575 | 31.56 |
| 3229.974 | 31.07 |
| 3240.441 | 30.71 |
| 3249.919 | 30.40 |
| 3260.515 | 29.31 |
| 3270.111 | 34.19 |
| 3279.764 | 32.72 |
| 3289.474 | 32.66 |
| 3300.33  | 31.93 |
| 3310.162 | 33.03 |
| 3320.053 | 33.58 |
| 3330.003 | 34.61 |
| 3340.013 | 37.42 |
| 3350.084 | 45.67 |

|          |       |
|----------|-------|
| 3360.215 | 52.20 |
| 3370.408 | 56.48 |
| 3379.52  | 59.45 |
| 3389.831 | 61.35 |
| 3400.204 | 64.11 |
| 3409.478 | 68.43 |
| 3419.973 | 74.48 |
| 3430.532 | 77.42 |
| 3439.972 | 78.45 |
| 3449.465 | 79.11 |
| 3460.208 | 77.05 |
| 3469.813 | 78.87 |
| 3479.471 | 79.23 |
| 3490.401 | 77.05 |
| 3500.175 | 69.23 |
| 3510.004 | 60.07 |
| 3519.887 | 47.56 |
| 3529.827 | 54.70 |
| 3539.823 | 53.11 |
| 3549.876 | 46.46 |
| 3559.986 | 38.46 |
| 3570.154 | 30.53 |
| 3580.38  | 23.93 |
| 3589.375 | 20.08 |
| 3599.712 | 16.91 |
| 3610.108 | 14.22 |
| 3620.565 | 10.87 |
| 3629.764 | 9.46  |
| 3640.335 | 7.63  |
| 3649.635 | 9.71  |
| 3660.322 | 7.51  |
| 3669.725 | 8.18  |
| 3680.53  | 25.95 |
| 3690.037 | 60.50 |
| 3699.593 | 51.95 |
| 3710.575 | 35.47 |
| 3720.238 | 28.08 |
| 3729.952 | 16.06 |
| 3739.716 | 16.05 |
| 3749.531 | 9.89  |
| 3759.399 | 7.45  |
| 3769.318 | 5.25  |
| 3779.289 | 4.33  |
| 3789.314 | 3.85  |
| 3799.392 | 3.54  |

|          |      |
|----------|------|
| 3809.524 | 3.30 |
| 3819.71  | 3.17 |
| 3829.95  | 3.17 |
| 3840.246 | 2.50 |
| 3850.597 | 2.26 |
| 3859.514 | 2.01 |
| 3869.969 | 1.65 |
| 3880.481 | 1.83 |
| 3889.537 | 1.47 |
| 3900.156 | 1.34 |
| 3909.304 | 1.53 |
| 3920.031 | 1.40 |
| 3929.273 | 1.22 |
| 3940.11  | 1.04 |
| 3949.447 | 1.10 |
| 3960.396 | 1.28 |
| 3969.829 | 1.40 |
| 3979.308 | 1.40 |
| 3990.423 | 1.16 |
| 4000     | 1.22 |

**Zn<sup>2+</sup>(H<sub>2</sub>O)<sub>16</sub>**

| Wavenumber / cm <sup>-1</sup> | Calculated Cross Section / 10 <sup>-21</sup> cm <sup>2</sup> |
|-------------------------------|--------------------------------------------------------------|
| 2250.225                      | 3.17                                                         |
| 2259.887                      | 2.62                                                         |
| 2270.148                      | 2.08                                                         |
| 2279.982                      | 2.01                                                         |
| 2289.902                      | 1.59                                                         |
| 2299.908                      | 1.59                                                         |
| 2310.002                      | 1.53                                                         |
| 2320.186                      | 1.53                                                         |
| 2329.916                      | 1.47                                                         |
| 2339.729                      | 1.53                                                         |
| 2350.176                      | 1.40                                                         |
| 2360.16                       | 1.53                                                         |
| 2370.23                       | 1.59                                                         |
| 2379.819                      | 1.53                                                         |
| 2390.057                      | 1.53                                                         |
| 2399.808                      | 1.47                                                         |
| 2410.219                      | 1.40                                                         |
| 2420.136                      | 1.71                                                         |
| 2430.134                      | 1.34                                                         |
| 2440.215                      | 1.34                                                         |
| 2449.78                       | 1.59                                                         |

|          |      |
|----------|------|
| 2460.025 | 1.83 |
| 2469.746 | 1.65 |
| 2480.159 | 1.65 |
| 2490.04  | 1.77 |
| 2500     | 1.59 |
| 2510.04  | 1.77 |
| 2520.161 | 1.89 |
| 2529.724 | 1.59 |
| 2540.005 | 1.53 |
| 2549.72  | 1.95 |
| 2560.164 | 1.28 |
| 2570.033 | 1.83 |
| 2579.979 | 1.40 |
| 2590.003 | 1.22 |
| 2600.104 | 1.28 |
| 2610.285 | 1.59 |
| 2619.859 | 1.16 |
| 2630.195 | 1.34 |
| 2639.916 | 1.47 |
| 2649.709 | 1.53 |
| 2660.282 | 0.06 |
| 2670.227 | 1.10 |
| 2680.247 | 1.47 |
| 2690.342 | 1.47 |
| 2699.784 | 1.53 |
| 2710.027 | 1.34 |
| 2720.348 | 1.34 |
| 2730.003 | 1.28 |
| 2739.726 | 1.47 |
| 2750.275 | 1.40 |
| 2760.144 | 1.53 |
| 2770.083 | 1.53 |
| 2780.095 | 1.59 |
| 2790.179 | 1.65 |
| 2800.336 | 1.59 |
| 2809.778 | 1.83 |
| 2820.079 | 1.77 |
| 2829.655 | 1.65 |
| 2840.102 | 1.89 |
| 2849.815 | 2.08 |
| 2859.594 | 2.26 |
| 2870.264 | 1.95 |
| 2880.184 | 2.69 |
| 2890.173 | 2.81 |
| 2900.232 | 2.87 |



|          |       |
|----------|-------|
| 2910.361 | 3.17  |
| 2919.708 | 3.48  |
| 2929.974 | 3.91  |
| 2940.312 | 4.40  |
| 2949.853 | 4.58  |
| 2960.332 | 5.31  |
| 2970.003 | 5.62  |
| 2979.738 | 6.35  |
| 2990.431 | 7.82  |
| 3000.3   | 8.30  |
| 3010.235 | 9.59  |
| 3020.236 | 10.99 |
| 3030.303 | 12.52 |
| 3040.438 | 13.92 |
| 3049.71  | 15.32 |
| 3059.976 | 16.18 |
| 3070.31  | 17.52 |
| 3079.766 | 18.86 |
| 3090.235 | 20.45 |
| 3099.814 | 21.30 |
| 3110.42  | 22.35 |
| 3120.125 | 23.69 |
| 3129.89  | 25.27 |
| 3139.717 | 27.84 |
| 3149.606 | 28.93 |
| 3159.558 | 30.46 |
| 3169.572 | 36.99 |
| 3179.65  | 40.35 |
| 3189.793 | 43.04 |
| 3200     | 48.59 |
| 3210.273 | 52.87 |
| 3219.575 | 57.13 |
| 3229.974 | 55.74 |
| 3240.441 | 54.04 |
| 3249.919 | 52.13 |
| 3260.515 | 49.46 |
| 3270.111 | 45.48 |
| 3279.764 | 43.95 |
| 3289.474 | 45.54 |
| 3300.33  | 45.49 |
| 3310.162 | 45.67 |
| 3320.053 | 47.37 |
| 3330.003 | 45.79 |
| 3340.013 | 46.34 |
| 3350.084 | 48.29 |

|          |       |
|----------|-------|
| 3360.215 | 46.09 |
| 3370.408 | 50.98 |
| 3379.52  | 53.17 |
| 3389.831 | 52.80 |
| 3400.204 | 56.23 |
| 3409.478 | 56.10 |
| 3419.973 | 57.93 |
| 3430.532 | 64.60 |
| 3439.972 | 68.86 |
| 3449.465 | 68.12 |
| 3460.208 | 71.13 |
| 3469.813 | 64.46 |
| 3479.471 | 65.37 |
| 3490.401 | 69.54 |
| 3500.175 | 61.72 |
| 3510.004 | 57.81 |
| 3519.887 | 45.85 |
| 3529.827 | 52.19 |
| 3539.823 | 52.13 |
| 3549.876 | 45.30 |
| 3559.986 | 38.22 |
| 3570.154 | 34.56 |
| 3580.38  | 33.89 |
| 3589.375 | 32.23 |
| 3599.712 | 28.51 |
| 3610.108 | 23.81 |
| 3620.565 | 17.65 |
| 3629.764 | 13.86 |
| 3640.335 | 11.54 |
| 3649.635 | 8.67  |
| 3660.322 | 7.20  |
| 3669.725 | 8.00  |
| 3680.53  | 13.13 |
| 3690.037 | 40.72 |
| 3699.593 | 43.28 |
| 3710.575 | 27.78 |
| 3720.238 | 29.49 |
| 3729.952 | 16.12 |
| 3739.716 | 9.22  |
| 3749.531 | 6.53  |
| 3759.399 | 4.58  |
| 3769.318 | 4.09  |
| 3779.289 | 2.69  |
| 3789.314 | 2.44  |
| 3799.392 | 1.89  |

|          |      |
|----------|------|
| 3809.524 | 1.77 |
| 3819.71  | 1.71 |
| 3829.95  | 1.59 |
| 3840.246 | 1.59 |
| 3850.597 | 1.77 |
| 3859.514 | 1.46 |
| 3869.969 | 1.71 |
| 3880.481 | 0.06 |
| 3889.537 | 0.06 |
| 3900.156 | 0.06 |
| 3909.304 | 0.06 |
| 3920.031 | 0.06 |
| 3929.273 | 0.06 |
| 3940.11  | 0.06 |
| 3949.447 | 0.06 |
| 3960.396 | 0.06 |
| 3969.829 | 0.06 |
| 3979.308 | 0.06 |
| 3990.423 | 0.06 |
| 4000     | 1.22 |

**Zn<sup>2+</sup>(H<sub>2</sub>O)<sub>20</sub>**

| Wavenumber / cm <sup>-1</sup> | Calculated Cross Section / 10 <sup>-21</sup> cm <sup>2</sup> |
|-------------------------------|--------------------------------------------------------------|
| 2250.225                      | 3.79                                                         |
| 2259.887                      | 4.15                                                         |
| 2270.148                      | 4.09                                                         |
| 2279.982                      | 4.09                                                         |
| 2289.902                      | 3.72                                                         |
| 2299.908                      | 3.91                                                         |
| 2310.002                      | 3.17                                                         |
| 2320.186                      | 3.30                                                         |
| 2329.916                      | 3.54                                                         |
| 2339.729                      | 3.60                                                         |
| 2350.176                      | 3.85                                                         |
| 2360.16                       | 3.85                                                         |
| 2370.23                       | 3.85                                                         |
| 2379.819                      | 3.54                                                         |
| 2390.057                      | 3.97                                                         |
| 2399.808                      | 4.03                                                         |
| 2410.219                      | 2.38                                                         |
| 2420.136                      | 3.48                                                         |
| 2430.134                      | 3.79                                                         |
| 2440.215                      | 3.91                                                         |

|          |      |
|----------|------|
| 2449.78  | 3.78 |
| 2460.025 | 3.85 |
| 2469.746 | 3.66 |
| 2480.159 | 4.09 |
| 2490.04  | 3.48 |
| 2500     | 3.42 |
| 2510.04  | 3.60 |
| 2520.161 | 3.72 |
| 2529.724 | 3.48 |
| 2540.005 | 3.24 |
| 2549.72  | 3.66 |
| 2560.164 | 3.79 |
| 2570.033 | 3.48 |
| 2579.979 | 2.20 |
| 2590.003 | 3.60 |
| 2600.104 | 3.72 |
| 2610.285 | 3.54 |
| 2619.859 | 3.11 |
| 2630.195 | 3.05 |
| 2639.916 | 3.17 |
| 2649.709 | 3.48 |
| 2660.282 | 3.17 |
| 2670.227 | 3.17 |
| 2680.247 | 2.01 |
| 2690.342 | 2.81 |
| 2699.784 | 2.93 |
| 2710.027 | 3.11 |
| 2720.348 | 3.60 |
| 2730.003 | 3.42 |
| 2739.726 | 3.48 |
| 2750.275 | 2.99 |
| 2760.144 | 3.36 |
| 2770.083 | 3.30 |
| 2780.095 | 3.05 |
| 2790.179 | 2.93 |
| 2800.336 | 3.97 |
| 2809.778 | 3.42 |
| 2820.079 | 3.79 |
| 2829.655 | 3.78 |
| 2840.102 | 4.64 |
| 2849.815 | 3.60 |
| 2859.594 | 4.39 |
| 2870.264 | 4.88 |
| 2880.184 | 4.95 |
| 2890.173 | 6.29 |

|          |       |
|----------|-------|
| 2900.232 | 5.92  |
| 2910.361 | 6.96  |
| 2919.708 | 7.63  |
| 2929.974 | 9.46  |
| 2940.312 | 8.98  |
| 2949.853 | 10.44 |
| 2960.332 | 10.62 |
| 2970.003 | 11.72 |
| 2979.738 | 11.96 |
| 2990.431 | 13.37 |
| 3000.3   | 14.71 |
| 3010.235 | 17.22 |
| 3020.236 | 18.62 |
| 3030.303 | 21.19 |
| 3040.438 | 23.26 |
| 3049.71  | 23.87 |
| 3059.976 | 25.34 |
| 3070.31  | 27.29 |
| 3079.766 | 28.39 |
| 3090.235 | 29.00 |
| 3099.814 | 32.23 |
| 3110.42  | 32.85 |
| 3120.125 | 35.35 |
| 3129.89  | 35.59 |
| 3139.717 | 37.85 |
| 3149.606 | 42.24 |
| 3159.558 | 44.93 |
| 3169.572 | 48.10 |
| 3179.65  | 50.66 |
| 3189.793 | 55.61 |
| 3200     | 58.97 |
| 3210.273 | 57.57 |
| 3219.575 | 63.91 |
| 3229.974 | 61.23 |
| 3240.441 | 58.07 |
| 3249.919 | 54.45 |
| 3260.515 | 54.34 |
| 3270.111 | 52.75 |
| 3279.764 | 50.73 |
| 3289.474 | 53.59 |
| 3300.33  | 54.16 |
| 3310.162 | 52.57 |
| 3320.053 | 53.91 |
| 3330.003 | 50.30 |
| 3340.013 | 53.85 |

|          |       |
|----------|-------|
| 3350.084 | 57.39 |
| 3360.215 | 56.11 |
| 3370.408 | 58.61 |
| 3379.52  | 60.80 |
| 3389.831 | 61.47 |
| 3400.204 | 64.65 |
| 3409.478 | 66.84 |
| 3419.973 | 67.76 |
| 3430.532 | 68.69 |
| 3439.972 | 72.46 |
| 3449.465 | 70.68 |
| 3460.208 | 72.77 |
| 3469.813 | 70.51 |
| 3479.471 | 72.51 |
| 3490.401 | 70.76 |
| 3500.175 | 68.26 |
| 3510.004 | 58.67 |
| 3519.887 | 48.65 |
| 3529.827 | 55.37 |
| 3539.823 | 56.04 |
| 3549.876 | 51.34 |
| 3559.986 | 47.56 |
| 3570.154 | 50.12 |
| 3580.38  | 49.64 |
| 3589.375 | 44.99 |
| 3599.712 | 37.30 |
| 3610.108 | 29.12 |
| 3620.565 | 21.37 |
| 3629.764 | 17.95 |
| 3640.335 | 11.84 |
| 3649.635 | 10.74 |
| 3660.322 | 10.56 |
| 3669.725 | 7.75  |
| 3680.53  | 11.30 |
| 3690.037 | 38.52 |
| 3699.593 | 49.44 |
| 3710.575 | 26.80 |
| 3720.238 | 22.35 |
| 3729.952 | 14.04 |
| 3739.716 | 8.49  |
| 3749.531 | 5.01  |
| 3759.399 | 4.03  |
| 3769.318 | 4.15  |
| 3779.289 | 4.39  |
| 3789.314 | 3.72  |

|          |      |
|----------|------|
| 3799.392 | 3.66 |
| 3809.524 | 2.44 |
| 3819.71  | 1.65 |
| 3829.95  | 1.59 |
| 3840.246 | 2.20 |
| 3850.597 | 3.72 |
| 3859.514 | 3.17 |
| 3869.969 | 1.47 |
| 3880.481 | 0.06 |
| 3889.537 | 1.53 |
| 3900.156 | 2.93 |
| 3909.304 | 1.46 |
| 3920.031 | 2.75 |
| 3929.273 | 2.50 |
| 3940.11  | 1.77 |
| 3949.447 | 0.06 |
| 3960.396 | 1.47 |
| 3969.829 | 1.59 |
| 3979.308 | 2.14 |
| 3990.423 | 3.24 |
| 4000     | 1.65 |

## References

1. Bersenkovitsch, N. K.; Ončák, M.; Heller, J.; van der Linde, C.; Beyer, M. K. Photodissociation of Sodium Iodide Clusters Doped with Small Hydrocarbons *Chem. Eur. J.* **2018**, *24*, 12433.
2. Heller, J.; Ončák, M.; Bersenkovitsch, N.K.; van der Linde, C.; Beyer, M. K. Infrared multiple photon dissociation of cesium iodide clusters doped with mono-, di- and triglycine *Eur. J. Mass Spectrom.* **2019**, *25*, 122–132.
3. Cunningham, E. M.; Taxer, T.; Heller, J.; Ončák, M.; van der Linde, C.; Beyer, M. K. Microsolvation of Zn cations: infrared multiple photon dissociation spectroscopy of  $\text{Zn}^+(\text{H}_2\text{O})_n$  ( $n = 2\text{--}35$ )<sup>†</sup> *Phys. Chem. Chem. Phys.* **2021**, *23*, 3627.
